# Supplementary material for: Photothermal conversion triggered thermal asymmetric catalysis within metal nanoparticles loaded homochiral covalent organic framework
Source: PubMed Central journal article supplement (PMC6662712; doi:10.1038/s41467-019-11355-x), 2019-07-29
Supplement: 41467_2019_11355_MOESM1_ESM.pdf [file 41467_2019_11355_MOESM1_ESM.pdf]

**Supporting Information for**  
**Photothermal conversion triggered thermal asymmetric catalysis within metal**  
**nanoparticles loaded homochiral covalent organic framework**

Ma et al.

## Supplementary Methods

**Materials and instruments.** The reagents and solvents employed were commercially available and used without further purification. TBrPP (tetra(4-bromophenyl)porphyrin) was prepared according to reported method.<sup>1</sup> The powder diffractometer (XRD) patterns were collected by a D8 ADVANCEX-ray with Cu K $\alpha$  radiation ( $\lambda = 1.5405 \text{ \AA}$ ). The total surface areas of the catalysts were measured by the BET (Brunauer–Emmer–Teller) method using N<sub>2</sub> adsorption at 77 K, this was done by the Micromeritics ASAP 2000 sorption/desorption analyzer. Inductively coupled plasma (ICP) measurement was conducted on an IRIS Intrepid (II) XSP and NU AttoM spectrometer. HRTEM (High resolution transmission electron microscopy) analysis was performed on a JEOL 2100 Electron Microscope at an operating voltage of 200 kV. Scanning electron microscopy (SEM) images were taken on a SUB010 scanning electron microscope with acceleration voltage of 20 kV. Elemental analyses for C, H and N were obtained on a Perkin-Elmer analyzer model 240. Infrared (IR) samples were prepared as KBr pellets, and spectra were obtained in the 400-4000cm<sup>-1</sup> range using a Perkin-Elmer 1600 FTIR spectrometer. <sup>13</sup>C NMR spectra were recorded on a MERCURY plus 400 spectrometer operating at resonance frequencies of 400 MHz. Thermogravimetric analyses (TGA) were carried out under flowing nitrogen at a heating rate of 10 °C·min<sup>-1</sup> on a TA Instrument Q5 analyzer. The solid-state CD spectra were recorded on a J-815 spectropolarimeter (Jasco, Japan). XPS spectra were obtained from PHI Versaprobe II. UV-vis spectrum was recorded on a Cary 5000 UV-vis spectrophotometer (Varian, USA). Gas chromatography (GC) analysis was performed on an Agilent 7890B GC. Enantiomer ratios were determined by chiral HPLC analysis using a Shimadzu LC-10AT VP series and a Shimadzu LC-10A VP UV-vis. Photocatalytic performances were evaluated by xenon lamp (300W with the intensities 2.5W cm<sup>-2</sup>).

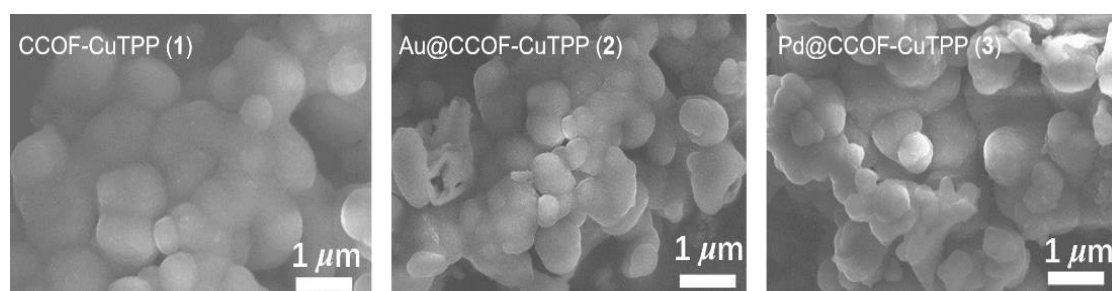

**Supplementary Figure 1.** SEM images of **1 - 3**.

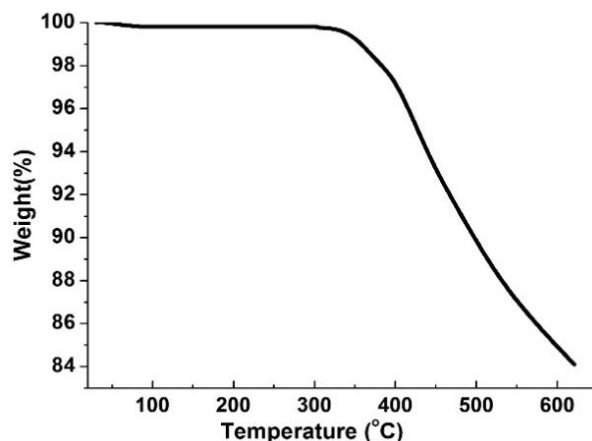

**Supplementary Figure 2.** TGA trace for the activated sample of **1**. No weight loss of **1** was observed up to ca. 350 °C.

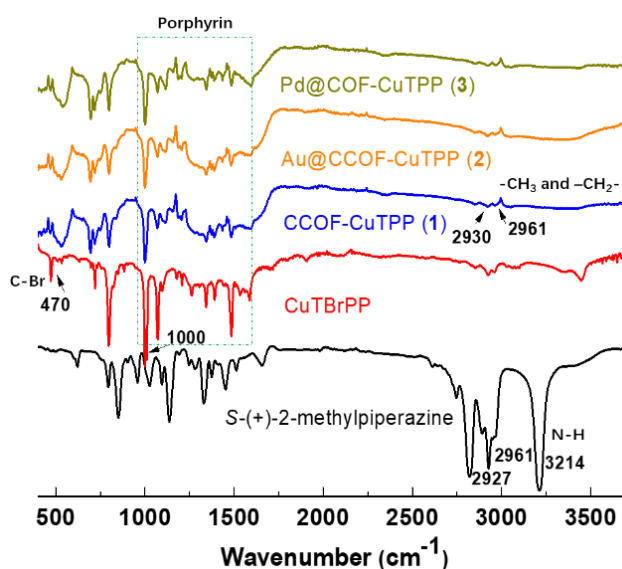

**Supplementary Figure 3.** IR spectra of CuTBPP, *S*-(+)-methylpiperazine, and **1** - **3**. The IR spectrum of **1** showed that the characteristic N-H stretching vibration at 3214 cm<sup>-1</sup> of *S*-MP and C-Br stretching vibration of TBrPP at 470 cm<sup>-1</sup> disappeared after the reaction. Meanwhile the C-H stretching vibrations (2961 and 2927 cm<sup>-1</sup> for methylpiperaziny C-H bonds) and characteristic porphyrin stretching vibrations (1340, 1390, 1490 and 1590 cm<sup>-1</sup> for porphyrin C=N bonds and 1000 cm<sup>-1</sup> for porphyrin skeleton vibration) indicated that both the methylpiperaziny and porphyrin units existed in **1**. In addition, **1-3** were characterized by elemental analysis or ICP. Elemental Analysis (%) calcd for C<sub>54</sub>H<sub>48</sub>CuN<sub>8</sub> (**1**): C, 74.33; N, 12.84; H, 5.54. Found (%): C, 74.04; N, 12.65; H, 6.02. ICP measurement indicated that the amount of Cu in **1** is 6.9 wt % (calcd. 7.2 wt %). The Au amount in **2** based on ICP is 17.9 wt %. The Pd amount in **3** based on ICP is 24.8 wt %.

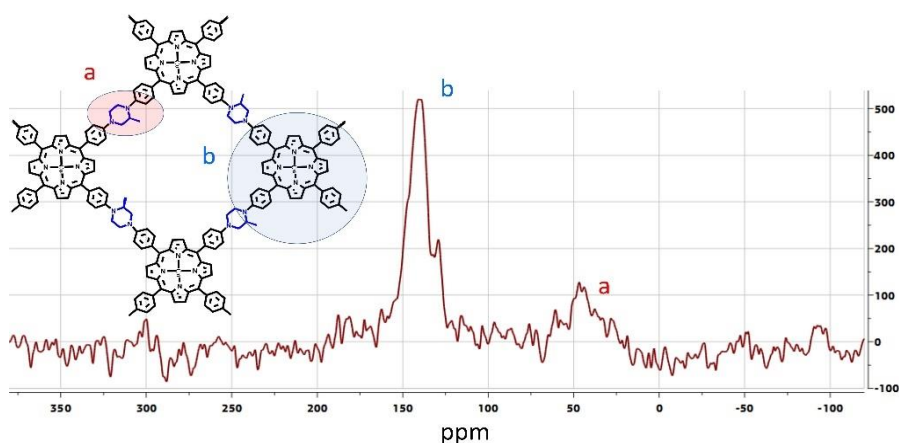

**Supplementary Figure 4.** Solid-state  $^{13}\text{C}$  NMR of **1**. The existence of both methylpiperazinyl and porphyrin units in **1** was evidenced by the characteristic resonances at 50 and 148 ppm, respectively.

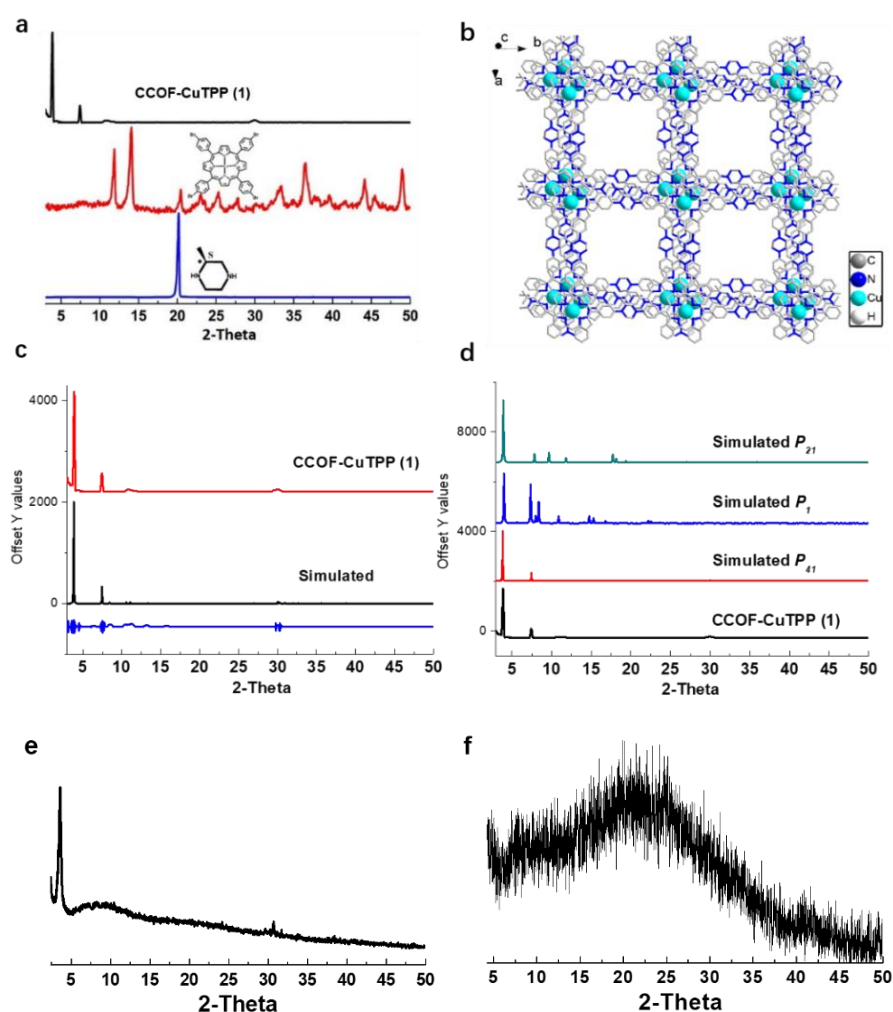

**Supplementary Figure 5.** **a**, PXRD patterns of **1**, *S*-(+)-2-methylpiperazine and Cu(II)-TBrPP. **b**, View of the ABCD-layered **1** (down the crystallographic *c* axis). Hydrogen atoms are omitted for clarity. **c**, The difference plot between measured and Rietveld-refined PXRD pattern of **1**. **d**, Simulated PXRD patterns of  $P_{21}$ ,  $P_1$  and  $P_{41}$  modes and the measured PXRD pattern of **1**. Compared to  $P_{21}$  and  $P_1$  modes, the  $P_{41}$  mode is more energetic preferential. **e**, The measured PXRD pattern of CCOF TPP without  $\text{Cu}^{2+}$ . **f**, The PXRD of amorphous CCOF (**1**).

### Supplementary Table 1. Simulated structure of **1**.

Structural modeling of **1** was generated using the Materials Studio (ver. 2018) suite of programs. Molecular geometry optimization was performed with MS DMol3 module. The initial lattice was created by starting with the space group  $P_{41}$ . The  $a$  and  $b$  lattice parameters (initially 22.073 Å) were estimated according to the center to center distance between the vertices of the COF. The constructed model was geometry optimized using the Forcite module (Universal force fields, Ewald summations). Then the calculated PXRD pattern was generated with the Reflex Plus module. Finally, Pawley refinement was applied for profile fitting, producing the refined PXRD profile with the lattice parameters of  $a = b = 22.073 (\pm 0.002)$  Å and  $c = 12.000 (\pm 0.002)$  Å.  $R_{wp}$  and  $R_p$  values converged to 3.72% and 2.89%, respectively (Supplementary Table 1).

Reflex Module in Material Studio using data from  $2\theta = 3.0-50^\circ$  (Supplementary Fig. 5). Backgrounds were first refined applying a 2nd order Chebyshev Polynomial. The profile was calculated starting with the unit cell parameters from the crystal models and the space group  $P_{41}$ . The integrated intensities ( $I_{obs}$ ) were extracted by a full pattern decomposition using a Thomson-Cox-Hastings pseudo Voigt peak profile, followed by refinement of peak asymmetry using Finger et al. asymmetry function (2 parameters). Unit cells and zero-shift were then refined with peak asymmetry. Once this was achieved, the background was refined with 20th-order polynomial. Refinement of unit cell parameters, zero shift, peak asymmetry, crystallite size and strain were used for the final profile.

Based on the measured and the simulated PXRD patterns (Supplementary Fig. 5), it is not possible to assign the CCOF-CuTPP (**1**) to  $P_1$  or  $P_{21}$  mode (Supplementary Table 2 and Table 3). The preferable structure of CCOF-CuTPP (**1**) is the  $P_{41}$  mode.

The total energies were calculated from fully optimized structures (Materials Studio Forcite molecular geometry optimization module, universal force fields using charges  $Q_{eq\_neutral}$  1.0, Ewald summations method). The total crystal stacking energy per layer has been obtained from the expression:  $E_{tot}$  (crystal stacking energy per layer) =  $[N \times E_{tot}(\text{monolayer}) - E_{tot}(\text{bulk})]/N$ , where  $E_{tot}$  (bulk) and  $E_{tot}$  (monolayer) are the total energies of the fully optimized crystal bulks and isolated monolayers, respectively, and  $N$  is the number of layers considered in the crystal bulk calculations. Monolayer energy is 394.05 kcal/mol,  $P_{41}$  space group (**1**) with ABCD stacking mode possessed the highest total crystal stacking energy per layer (338.57 kcal/mol) among other types of possible simulated space groups ( $P_{21}$  251.30 kcal/mol,  $P_1$  49.31 kcal/mol) with different stacking modes.

**Supplementary Table 1.** The structure model of CCOF-CuTPP (**1**) with  $P_{41}$  mode.

| CCOF-CuTPP ( <b>1</b> ) Space group: $P_{41}$                            |          |          |          |
|--------------------------------------------------------------------------|----------|----------|----------|
| $a = 22.073 \text{ \AA}, b = 22.073 \text{ \AA}, c = 12.000 \text{ \AA}$ |          |          |          |
| $\alpha = 90.0^\circ, \beta = 90.0^\circ, \gamma = 90.0^\circ$           |          |          |          |
| Atom                                                                     | x        | y        | z        |
| C1                                                                       | 0.36981  | -1.85856 | 0.00699  |
| C2                                                                       | 0.33488  | -1.80544 | 0.00645  |
| C3                                                                       | 0.27144  | -1.80529 | 0.00623  |
| C4                                                                       | 0.23640  | -1.85839 | 0.00662  |
| C5                                                                       | 0.27122  | -1.91154 | 0.00750  |
| C6                                                                       | 0.33464  | -1.91164 | 0.00779  |
| C7                                                                       | -0.11873 | -1.69060 | -0.00431 |
| C8                                                                       | -0.16726 | -1.73905 | 0.00144  |
| C9                                                                       | -0.13368 | -1.79983 | 0.00336  |
| N10                                                                      | -0.06509 | -1.79275 | -0.00069 |
| C11                                                                      | -0.05793 | -1.72420 | -0.00559 |
| C12                                                                      | 0.00040  | -1.68945 | -0.00835 |
| C13                                                                      | -0.16838 | -1.85777 | 0.00597  |
| C14                                                                      | 0.11859  | -2.02528 | 0.00042  |
| C15                                                                      | 0.16712  | -1.97675 | 0.00298  |
| C16                                                                      | 0.13364  | -1.91594 | 0.00329  |
| N17                                                                      | 0.06504  | -1.92306 | 0.00125  |
| C18                                                                      | 0.05784  | -1.99168 | -0.00016 |
| C19                                                                      | 0.16847  | -1.85803 | 0.00388  |
| C20                                                                      | -0.00021 | -2.02631 | 0.00053  |
| C21                                                                      | -0.16736 | -1.97647 | 0.00662  |
| C22                                                                      | -0.11894 | -2.02509 | 0.00394  |
| C23                                                                      | -0.05808 | -1.99157 | 0.00189  |
| N24                                                                      | -0.06516 | -1.92295 | 0.00275  |
| C25                                                                      | -0.13372 | -1.91570 | 0.00560  |
| C26                                                                      | 0.16744  | -1.73916 | -0.00071 |
| C27                                                                      | 0.11893  | -1.69060 | -0.00626 |
| C28                                                                      | 0.05807  | -1.72411 | -0.00623 |
| N29                                                                      | 0.06524  | -1.79274 | -0.00122 |
| C30                                                                      | 0.13388  | -1.79997 | 0.00183  |
| Cu31                                                                     | 0.00004  | -1.85788 | 0.00051  |
| C32                                                                      | -0.23635 | -1.85767 | 0.00696  |
| C33                                                                      | -0.27128 | -1.80454 | 0.00643  |
| C34                                                                      | -0.33472 | -1.80439 | 0.00620  |
| C35                                                                      | -0.36976 | -1.85750 | 0.00659  |
| C36                                                                      | -0.33494 | -1.91065 | 0.00747  |
| C37                                                                      | -0.27151 | -1.91074 | 0.00777  |

|     |          |          |          |
|-----|----------|----------|----------|
| N38 | 0.43407  | -1.85954 | -0.03098 |
| C39 | 0.46804  | -1.91871 | -0.04082 |
| C40 | 0.52765  | -1.91577 | 0.02563  |
| N41 | 0.56285  | -1.85994 | -0.00743 |
| C42 | 0.52779  | -1.80438 | 0.02776  |
| C43 | 0.46799  | -1.80024 | -0.03794 |
| C44 | -0.00007 | -2.09413 | 0.00848  |
| C45 | -0.05319 | -2.12905 | 0.00852  |
| C46 | -0.05334 | -2.19249 | 0.00870  |
| C47 | -0.00023 | -2.22753 | 0.00898  |
| C48 | 0.05292  | -2.19271 | 0.00930  |
| C49 | 0.05301  | -2.12928 | 0.00918  |
| C50 | 0.00018  | -1.48844 | 0.00460  |
| C51 | -0.05303 | -1.52353 | 0.00463  |
| C52 | -0.05296 | -1.58697 | 0.00482  |
| C53 | 0.00026  | -1.62182 | 0.00509  |
| C54 | 0.05330  | -1.58682 | 0.00541  |
| C55 | 0.05317  | -1.52339 | 0.00529  |
| N56 | -0.00073 | -1.42434 | -0.03379 |
| C57 | 0.05835  | -1.39029 | -0.04423 |
| C58 | 0.05544  | -1.33056 | 0.02185  |
| N59 | -0.00052 | -1.29552 | -0.01108 |
| C60 | -0.05595 | -1.33060 | 0.02470  |
| C61 | -0.06010 | -1.39054 | -0.04059 |
| C62 | -0.05375 | -1.19318 | 0.00229  |
| C63 | -0.00070 | -1.22832 | 0.00257  |
| C64 | 0.05251  | -1.19359 | 0.00288  |
| C65 | 0.56561  | 0.25270  | 0.00073  |
| C66 | 0.88708  | 0.70735  | 0.02185  |
| H67 | 0.56608  | 0.26037  | -0.09321 |
| H68 | 0.61398  | 0.24612  | 0.03175  |
| H69 | 0.54466  | 0.29372  | 0.04372  |
| H70 | 0.84705  | 0.67899  | 0.05157  |
| H71 | 0.87840  | 0.72342  | -0.06701 |
| H72 | 0.89281  | 0.74827  | 0.07885  |
| H73 | 0.35806  | 0.24071  | 0.00618  |
| H74 | 0.24572  | 0.23950  | 0.00571  |
| H75 | 0.24795  | 0.04235  | 0.00801  |
| H76 | 0.36040  | 0.04360  | 0.00873  |
| H77 | 0.21700  | 0.00988  | 0.00421  |
| H78 | 0.21733  | 0.27419  | 0.00072  |
| H79 | 0.13235  | 0.35924  | -0.00941 |

|      |         |         |          |
|------|---------|---------|----------|
| H80  | 0.47861 | 0.07208 | -0.13225 |
| H81  | 0.43890 | 0.04296 | -0.00649 |
| H82  | 0.55589 | 0.04216 | 0.00722  |
| H83  | 0.51709 | 0.08621 | 0.11855  |
| H84  | 0.51793 | 0.19362 | 0.12094  |
| H85  | 0.47831 | 0.21045 | -0.12892 |
| H86  | 0.43864 | 0.23732 | -0.00140 |
| H87  | 0.09949 | 0.39008 | 0.00578  |
| H88  | 0.09784 | 0.50252 | 0.00578  |
| H89  | 0.06737 | 0.62012 | -0.13579 |
| H90  | 0.09681 | 0.58070 | -0.00995 |
| H91  | 0.09742 | 0.69772 | 0.00299  |
| H92  | 0.05365 | 0.65905 | 0.11485  |
| H93  | 0.09757 | 0.78159 | 0.01133  |
| H94  | 0.86792 | 0.35927 | -0.00671 |
| H95  | 0.78288 | 0.27437 | 0.00340  |
| H96  | 0.78275 | 0.01025 | 0.00882  |
| H97  | 0.75191 | 0.24161 | 0.00615  |
| H98  | 0.63956 | 0.24040 | 0.00568  |
| H99  | 0.64179 | 0.04324 | 0.00799  |
| H100 | 0.75424 | 0.04449 | 0.00870  |
| H101 | 0.90078 | 0.49959 | 0.00450  |
| H102 | 0.90234 | 0.38716 | 0.00475  |
| H103 | 0.95160 | 0.65652 | 0.11564  |
| H104 | 0.92902 | 0.61959 | -0.13157 |
| H105 | 0.90245 | 0.58011 | -0.00362 |
| H106 | 0.13197 | 0.92484 | -0.00064 |
| H107 | 0.86760 | 0.92505 | 0.00381  |

**Supplementary Table 2.** The structure model of CCOF-CuTPP (1) with  $P_1$  mode.

|                                                                                |          |          |          |
|--------------------------------------------------------------------------------|----------|----------|----------|
| CCOF-CuTPP (1) Space group: $P_1$                                              |          |          |          |
| $a = 22.073 \text{ \AA}$ , $b = 22.073 \text{ \AA}$ , $c = 12.000 \text{ \AA}$ |          |          |          |
| $\alpha = 90.0^\circ$ , $\beta = 90.0^\circ$ , $\gamma = 90.0^\circ$           |          |          |          |
| C1                                                                             | 0.36981  | -1.85856 | 0.00699  |
| C2                                                                             | 0.33488  | -1.80544 | 0.00645  |
| C3                                                                             | 0.27144  | -1.80529 | 0.00623  |
| C4                                                                             | 0.23640  | -1.85839 | 0.00662  |
| C5                                                                             | 0.27122  | -1.91154 | 0.00750  |
| C6                                                                             | 0.33464  | -1.91164 | 0.00779  |
| C7                                                                             | -0.11873 | -1.69060 | -0.00431 |
| C8                                                                             | -0.16726 | -1.73905 | 0.00144  |
| C9                                                                             | -0.13368 | -1.79983 | 0.00336  |



|      |          |          |          |
|------|----------|----------|----------|
| N10  | -0.06509 | -1.79275 | -0.00069 |
| C11  | -0.05793 | -1.72420 | -0.00559 |
| C12  | 0.00040  | -1.68945 | -0.00835 |
| C13  | -0.16838 | -1.85777 | 0.00597  |
| C14  | 0.11859  | -2.02528 | 0.00042  |
| C15  | 0.16712  | -1.97675 | 0.00298  |
| C16  | 0.13364  | -1.91594 | 0.00329  |
| N17  | 0.06504  | -1.92306 | 0.00125  |
| C18  | 0.05784  | -1.99168 | -0.00016 |
| C19  | 0.16847  | -1.85803 | 0.00388  |
| C20  | -0.00021 | -2.02631 | 0.00053  |
| C21  | -0.16736 | -1.97647 | 0.00662  |
| C22  | -0.11894 | -2.02509 | 0.00394  |
| C23  | -0.05808 | -1.99157 | 0.00189  |
| N24  | -0.06516 | -1.92295 | 0.00275  |
| C25  | -0.13372 | -1.91570 | 0.00560  |
| C26  | 0.16744  | -1.73916 | -0.00071 |
| C27  | 0.11893  | -1.69060 | -0.00626 |
| C28  | 0.05807  | -1.72411 | -0.00623 |
| N29  | 0.06524  | -1.79274 | -0.00122 |
| C30  | 0.13388  | -1.79997 | 0.00183  |
| Cu31 | 0.00004  | -1.85788 | 0.00051  |
| C32  | -0.23635 | -1.85767 | 0.00696  |
| C33  | -0.27128 | -1.80454 | 0.00643  |
| C34  | -0.33472 | -1.80439 | 0.00620  |
| C35  | -0.36976 | -1.85750 | 0.00659  |
| C36  | -0.33494 | -1.91065 | 0.00747  |
| C37  | -0.27151 | -1.91074 | 0.00777  |
| N38  | 0.43407  | -1.85954 | -0.03098 |
| C39  | 0.46804  | -1.91871 | -0.04082 |
| C40  | 0.52765  | -1.91577 | 0.02563  |
| N41  | 0.56285  | -1.85994 | -0.00743 |
| C42  | 0.52779  | -1.80438 | 0.02776  |
| C43  | 0.46799  | -1.80024 | -0.03794 |
| C44  | -0.00007 | -2.09413 | 0.00848  |
| C45  | -0.05319 | -2.12905 | 0.00852  |
| C46  | -0.05334 | -2.19249 | 0.00870  |
| C47  | -0.00023 | -2.22753 | 0.00898  |
| C48  | 0.05292  | -2.19271 | 0.00930  |
| C49  | 0.05301  | -2.12928 | 0.00918  |
| C50  | 0.00018  | -1.48844 | 0.00460  |
| C51  | -0.05303 | -1.52353 | 0.00463  |

|     |          |          |          |
|-----|----------|----------|----------|
| C52 | -0.05296 | -1.58697 | 0.00482  |
| C53 | 0.00026  | -1.62182 | 0.00509  |
| C54 | 0.05330  | -1.58682 | 0.00541  |
| C55 | 0.05317  | -1.52339 | 0.00529  |
| N56 | -0.00073 | -1.42434 | -0.03379 |
| C57 | 0.05835  | -1.39029 | -0.04423 |
| C58 | 0.05544  | -1.33056 | 0.02185  |
| N59 | -0.00052 | -1.29552 | -0.01108 |
| C60 | -0.05595 | -1.33060 | 0.02470  |
| C61 | -0.06010 | -1.39054 | -0.04059 |
| C62 | -0.05375 | -1.19318 | 0.00229  |
| C63 | -0.00070 | -1.22832 | 0.00257  |
| C64 | 0.05251  | -1.19359 | 0.00288  |
| C65 | 0.56561  | 0.25270  | 0.00073  |
| C66 | 0.88708  | 0.70735  | 0.02185  |
| H67 | 0.35806  | -1.75929 | 0.00618  |
| H68 | 0.24572  | -1.76050 | 0.00571  |
| H69 | 0.24795  | -1.95765 | 0.00801  |
| H70 | 0.36040  | -1.95640 | 0.00873  |
| H71 | -0.13208 | -1.64073 | -0.00671 |
| H72 | -0.21712 | -1.72563 | 0.00340  |
| H73 | 0.13197  | -2.07516 | -0.00064 |
| H74 | 0.21700  | -1.99012 | 0.00421  |
| H75 | -0.21725 | -1.98975 | 0.00882  |
| H76 | -0.13240 | -2.07495 | 0.00381  |
| H77 | 0.21733  | -1.72581 | 0.00072  |
| H78 | 0.13235  | -1.64076 | -0.00941 |
| H79 | -0.24809 | -1.75839 | 0.00615  |
| H80 | -0.36044 | -1.75960 | 0.00568  |
| H81 | -0.35821 | -1.95676 | 0.00799  |
| H82 | -0.24576 | -1.95551 | 0.00870  |
| H83 | 0.47861  | -1.92792 | -0.13225 |
| H84 | 0.43890  | -1.95704 | -0.00649 |
| H85 | 0.55589  | -1.95784 | 0.00722  |
| H86 | 0.51709  | -1.91379 | 0.11855  |
| H87 | 0.51793  | -1.80638 | 0.12094  |
| H88 | 0.47831  | -1.78955 | -0.12892 |
| H89 | 0.43864  | -1.76268 | -0.00140 |
| H90 | -0.09922 | -1.50041 | 0.00450  |
| H91 | -0.09766 | -1.61284 | 0.00475  |
| H92 | 0.09949  | -1.60992 | 0.00578  |
| H93 | 0.09784  | -1.49748 | 0.00578  |

|      |          |          |          |
|------|----------|----------|----------|
| H94  | 0.06737  | -1.37988 | -0.13579 |
| H95  | 0.09681  | -1.41930 | -0.00995 |
| H96  | 0.09742  | -1.30228 | 0.00299  |
| H97  | 0.05365  | -1.34095 | 0.11485  |
| H98  | -0.04840 | -1.34348 | 0.11564  |
| H99  | -0.07098 | -1.38041 | -0.13157 |
| H100 | -0.09755 | -1.41989 | -0.00362 |
| H101 | 0.09757  | -1.21841 | 0.01133  |
| H102 | 0.56608  | 0.26037  | -0.09321 |
| H103 | 0.61398  | 0.24612  | 0.03175  |
| H104 | 0.54466  | 0.29372  | 0.04372  |
| H105 | 0.84705  | 0.67899  | 0.05157  |
| H106 | 0.87840  | 0.72342  | -0.06701 |
| H107 | 0.89281  | 0.74827  | 0.07885  |

**Supplementary Table 3.** The structure model of CCOF-CuTPP (**1**) with  $P_{21}$  mode.

|                                                                             |          |          |         |
|-----------------------------------------------------------------------------|----------|----------|---------|
| CCOF-CuTPP ( <b>1</b> )    Space group: $P_{21}$                            |          |          |         |
| $a = 22.5300 \text{ \AA}, b = 10.0000 \text{ \AA}, c = 22.5300 \text{ \AA}$ |          |          |         |
| $\alpha = 90.0^\circ, \beta = 90.0^\circ, \gamma = 90.0^\circ$              |          |          |         |
| N1                                                                          | -1.26833 | -2.97246 | 0.49756 |
| C2                                                                          | -1.29862 | -3.02948 | 0.55163 |
| C3                                                                          | -1.36375 | -2.98280 | 0.55329 |
| N4                                                                          | -1.39435 | -3.03346 | 0.49812 |
| C5                                                                          | -1.36533 | -2.97252 | 0.44419 |
| C6                                                                          | -1.30007 | -3.01807 | 0.44215 |
| C7                                                                          | -1.26568 | -2.98225 | 0.60767 |
| H8                                                                          | -1.29725 | -3.14333 | 0.54940 |
| C9                                                                          | -1.49518 | -3.00148 | 0.43978 |
| C10                                                                         | -1.46083 | -3.01172 | 0.49870 |
| C11                                                                         | -1.49465 | -3.00144 | 0.55798 |
| C12                                                                         | -0.99545 | -2.99994 | 0.38369 |
| C13                                                                         | -0.94779 | -2.99993 | 0.33626 |
| C14                                                                         | -0.88829 | -2.99994 | 0.36928 |
| N15                                                                         | -0.89543 | -2.99991 | 0.43648 |
| C16                                                                         | -0.96269 | -2.99992 | 0.44332 |
| C17                                                                         | -0.99687 | -2.99989 | 0.49997 |
| C18                                                                         | -0.83149 | -3.00013 | 0.33536 |
| C19                                                                         | -0.77469 | -3.00032 | 0.36940 |
| C20                                                                         | -0.83168 | -3.00001 | 0.26684 |
| C21                                                                         | -0.96300 | -2.99979 | 0.55684 |
| C22                                                                         | -1.06542 | -2.99995 | 0.49963 |
| C23                                                                         | -0.71510 | -3.00031 | 0.33656 |

|      |          |          |          |
|------|----------|----------|----------|
| C24  | -0.66755 | -2.99942 | 0.38416  |
| C25  | -0.70041 | -2.99889 | 0.44378  |
| N26  | -0.76771 | -2.99975 | 0.43668  |
| C27  | -0.66637 | -2.99749 | 0.50066  |
| C28  | -0.70062 | -2.99874 | 0.55743  |
| C29  | -0.66798 | -2.99933 | 0.61714  |
| C30  | -0.71571 | -3.00032 | 0.66459  |
| C31  | -0.77523 | -3.00042 | 0.63160  |
| N32  | -0.76797 | -2.99966 | 0.56433  |
| N33  | -0.89574 | -2.99993 | 0.56403  |
| C34  | -0.88890 | -3.00025 | 0.63130  |
| C35  | -0.94860 | -3.00004 | 0.66400  |
| C36  | -0.99605 | -2.99979 | 0.61632  |
| C37  | -0.83220 | -3.00092 | 0.66551  |
| C38  | -0.83266 | -3.00192 | 0.73413  |
| C39  | -0.59765 | -2.99581 | 0.50064  |
| C40  | -1.10015 | -2.99995 | 0.55854  |
| C41  | -1.16852 | -2.99997 | 0.55809  |
| C42  | -1.20234 | -2.99998 | 0.49871  |
| C43  | -1.16774 | -2.99997 | 0.43978  |
| C44  | -1.09939 | -2.99996 | 0.44028  |
| C45  | -0.77386 | -3.00136 | 0.76906  |
| C46  | -0.77451 | -3.00030 | 0.83748  |
| C47  | -0.83398 | -2.99886 | 0.87121  |
| C48  | -0.89278 | -3.00287 | 0.83639  |
| C49  | -0.89209 | -3.00374 | 0.76800  |
| C50  | -0.56335 | -2.99510 | 0.44144  |
| C51  | -0.56290 | -2.99496 | 0.55963  |
| C52  | -0.89099 | -2.99996 | 0.23282  |
| C53  | -0.89140 | -3.00005 | 0.16448  |
| C54  | -0.83242 | -3.00007 | 0.12998  |
| C55  | -0.77307 | -3.00001 | 0.16387  |
| C56  | -0.77271 | -2.99996 | 0.23223  |
| Cu57 | -0.83169 | -2.99988 | 0.50039  |
| H58  | -0.73824 | -3.00591 | 0.05988  |
| N59  | -0.83337 | -2.97266 | 0.06393  |
| C60  | -0.88753 | -3.03045 | 0.03416  |
| C61  | -0.89184 | -2.98340 | -0.03077 |
| N62  | -0.83321 | -2.98908 | -0.06334 |
| C63  | -0.77534 | -2.97983 | -0.02966 |
| C64  | -0.78002 | -3.03362 | 0.03413  |
| H65  | -1.36552 | -2.86890 | 0.55434  |

|      |          |          |          |
|------|----------|----------|----------|
| H66  | -1.38635 | -3.02491 | 0.59452  |
| H67  | -1.36739 | -2.85883 | 0.44730  |
| H68  | -1.38948 | -3.00735 | 0.40250  |
| H69  | -1.27750 | -2.97286 | 0.40155  |
| H70  | -1.29814 | -3.13179 | 0.43925  |
| H71  | -1.22937 | -2.90848 | 0.59464  |
| H72  | -1.24490 | -3.07203 | 0.63092  |
| H73  | -1.29836 | -2.93124 | 0.63897  |
| H74  | -1.47006 | -2.99875 | 0.39587  |
| H75  | -1.46912 | -2.99850 | 0.60164  |
| H76  | -1.04429 | -2.99997 | 0.37047  |
| H77  | -0.96077 | -2.99992 | 0.28735  |
| H78  | -0.71409 | -3.00091 | 0.28597  |
| H79  | -0.61866 | -2.99927 | 0.37110  |
| H80  | -0.61739 | -2.99899 | 0.61832  |
| H81  | -0.70276 | -3.00081 | 0.71350  |
| H82  | -0.94973 | -3.00010 | 0.71459  |
| H83  | -1.04495 | -2.99964 | 0.62930  |
| H84  | -1.07525 | -2.99992 | 0.60259  |
| H85  | -1.19410 | -2.99997 | 0.60175  |
| H86  | -1.19272 | -2.99998 | 0.39578  |
| H87  | -1.07377 | -2.99995 | 0.39665  |
| H88  | -0.72973 | -3.00172 | 0.74431  |
| H89  | -0.73093 | -3.00058 | 0.86319  |
| H90  | -0.93686 | -3.00521 | 0.86121  |
| H91  | -0.93565 | -3.00572 | 0.74226  |
| H92  | -0.58854 | -2.98975 | 0.39762  |
| H93  | -0.58705 | -2.98964 | 0.60403  |
| H94  | -0.93474 | -2.99986 | 0.25824  |
| H95  | -0.93537 | -3.00009 | 0.13944  |
| H96  | -0.72937 | -3.00001 | 0.13837  |
| H97  | -0.72875 | -2.99989 | 0.25730  |
| H98  | -0.76074 | -2.87074 | -0.02801 |
| H99  | -0.73990 | -3.04062 | -0.05367 |
| C100 | 0.94553  | 0.46902  | 0.92966  |
| H101 | -0.87629 | -3.14117 | 0.02986  |
| H102 | -0.90890 | -2.87609 | -0.03151 |
| H103 | -0.92449 | -3.04972 | -0.05582 |
| H104 | -0.78496 | -3.14704 | 0.03298  |
| H105 | 0.93611  | 0.50519  | 0.88261  |
| H106 | 0.96419  | 0.36313  | 0.92803  |
| H107 | 0.97920  | 0.53835  | 0.95156  |

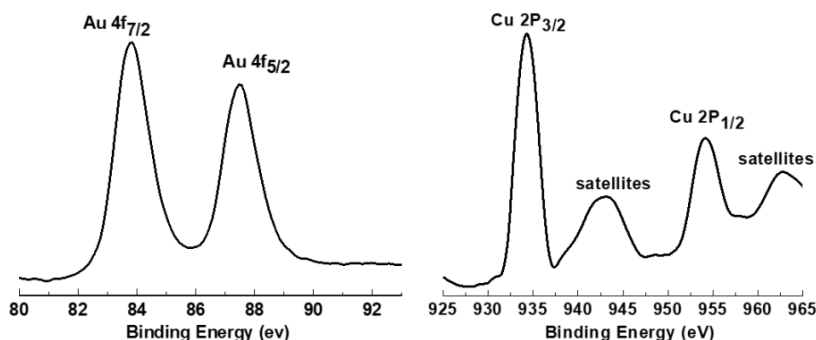

**Supplementary Figure 6.** XPS spectra of Au(0) (left) and Cu(II) (right) species in **2**. The observation of Au 4f<sub>7/2</sub> and 4f<sub>5/2</sub> peaks at 84.0 and 87.5 eV demonstrated the existence of Au(0) in **2**. In addition, the two peaks at 934.5 and 954.8 eV in XPS spectrum were assigned to Cu (2p<sub>3/2</sub>) and Cu(2p<sub>1/2</sub>), indicating that the oxidation state of Cu species in **2** is still bivalent and no valence variation occurred during the Au(III)-reduction process.

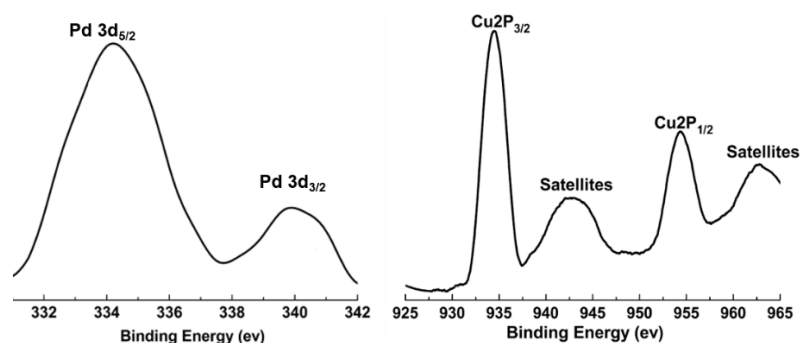

**Supplementary Figure 7.** XPS spectra of Pd(0) (left) and Cu(II) (right) species in **3**. The observation of Pd d<sub>5/2</sub> and d<sub>3/2</sub> peaks at 334.5 and 341.0 eV demonstrated the existence of Pd(0) in **3**. In addition, the two peaks at 934.8 and 954.5 eV in XPS spectrum were assigned to Cu 2p<sub>3/2</sub> and 2p<sub>1/2</sub>, indicating that the oxidation state of Cu species in **3** did not change.

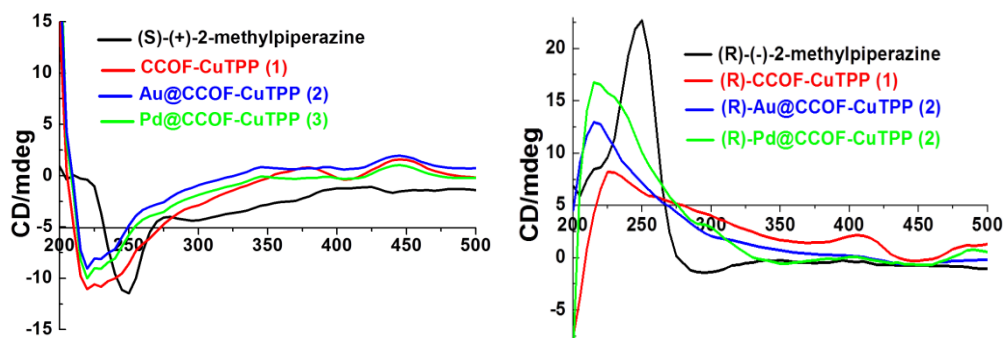

**Supplementary Figure 8.** Left: CD spectra of *S*-(+)-2-methylpiperazine, and **1-3**. Right: For further confirming the chirality of **1-3**, the corresponding *R*-CCOF-based **1-3** from *R*-(-)-2-methylpiperazine, Cu-TBrPP and corresponding M NP were prepared. The positive dichroic signals at 250 nm for (*R*)-methylpiperazine, 225 nm for *R*-CCOF, 220 nm for Au@*R*-CCOF and 220 nm for Pd@*R*-CCOF were observed, while the negative Cotton effect at 445 nm for *R*-CCOF, 455 nm for Au@*R*-CCOF and 460 nm for Pd@*R*-CCOF were also detected in their CD spectra (right).

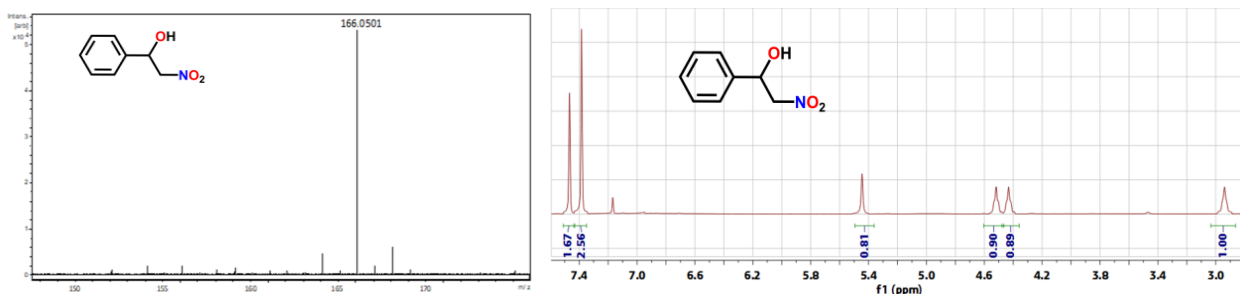

**Supplementary Figure 9.** ESI-MS and <sup>1</sup>H NMR spectra for the nitroaldol product generated from the model one-pot asymmetric Henry reaction. MS (ESI<sup>+</sup>): exact mass calcd for C<sub>8</sub>H<sub>9</sub>NO<sub>3</sub>, 167.0582 ([M+H]<sup>+</sup>). Found: 166.0501.

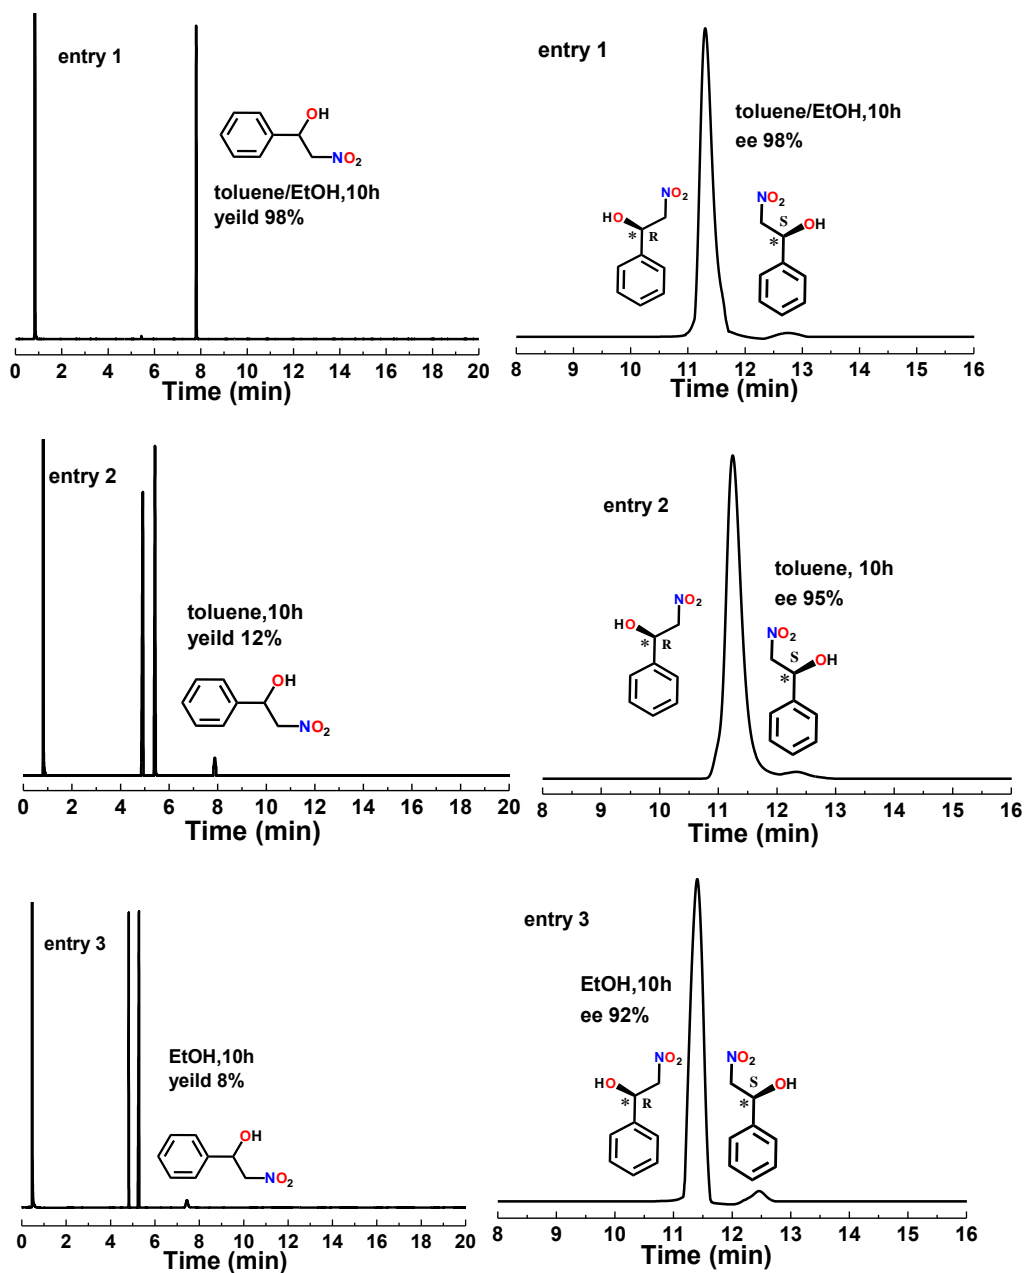

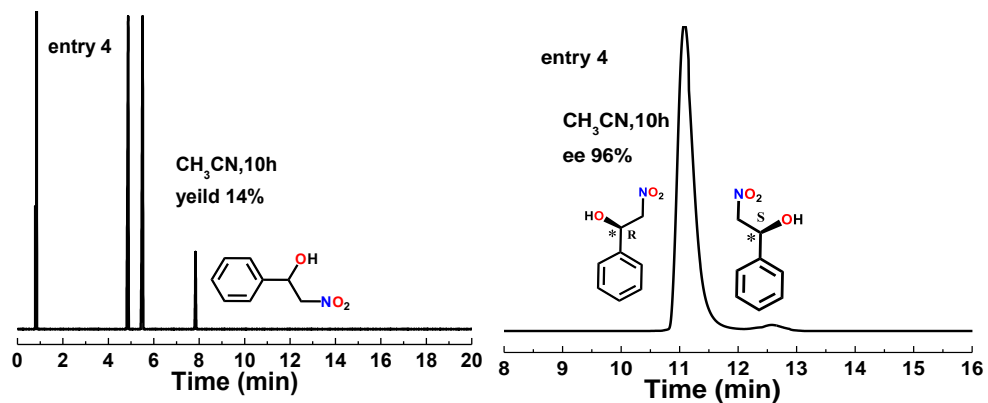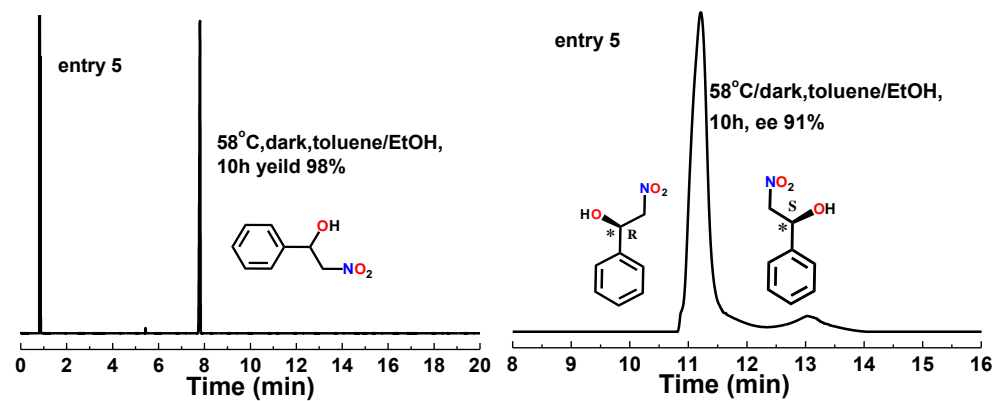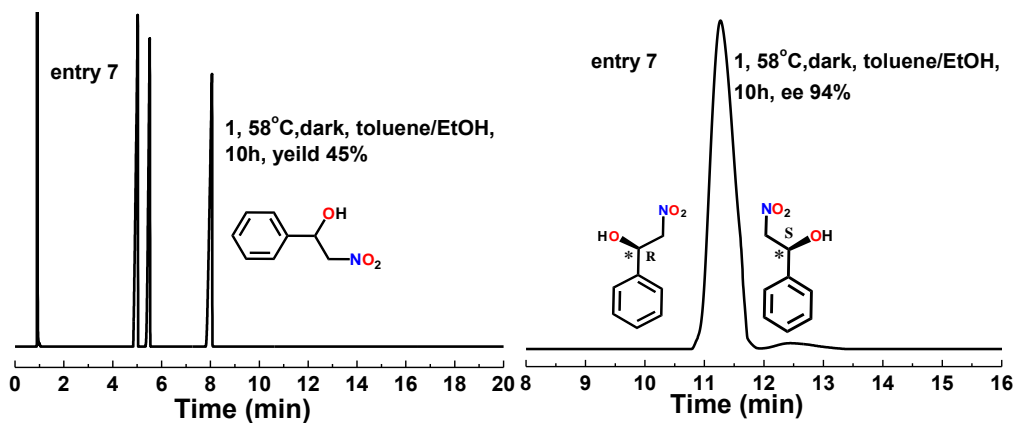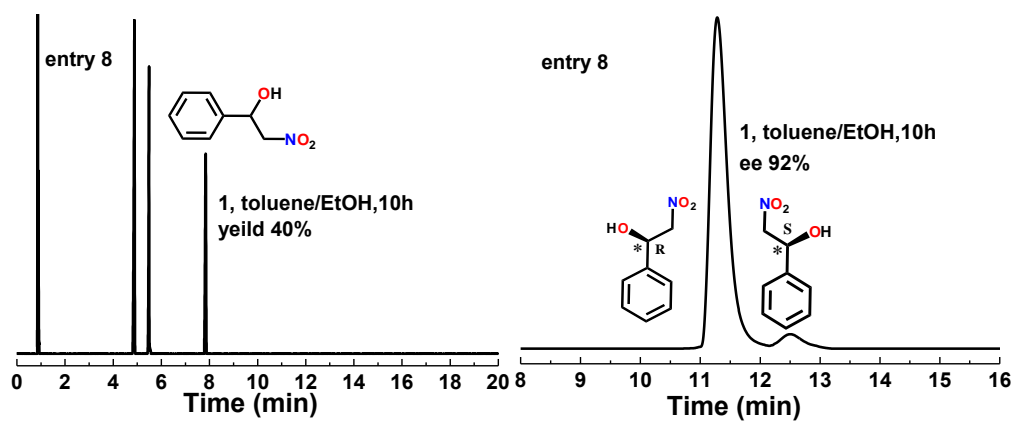



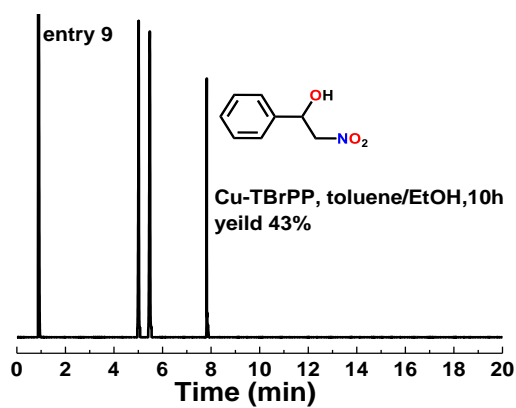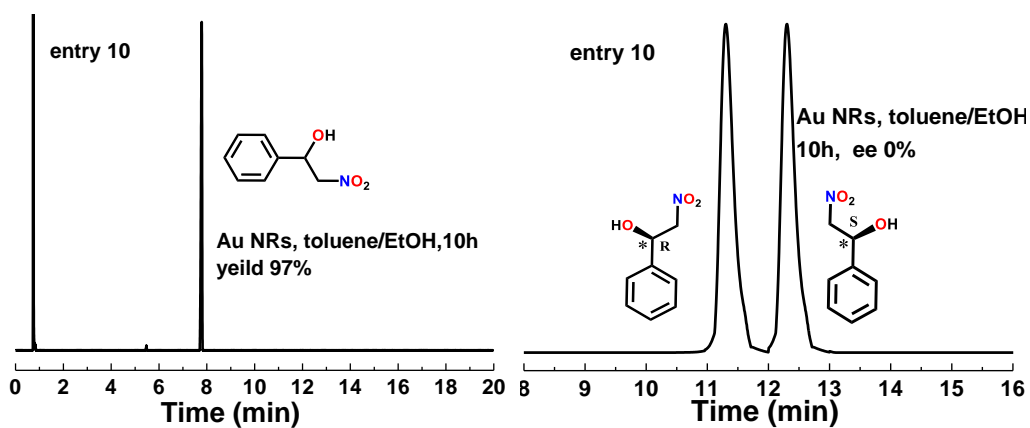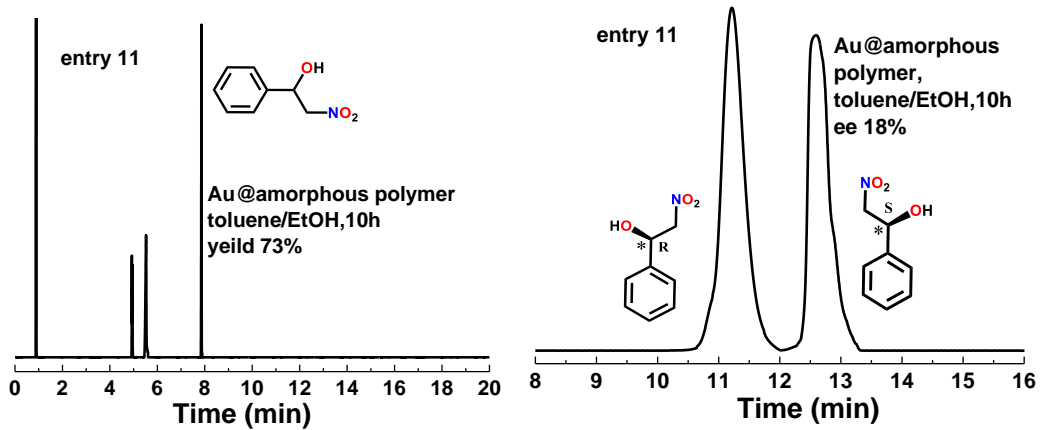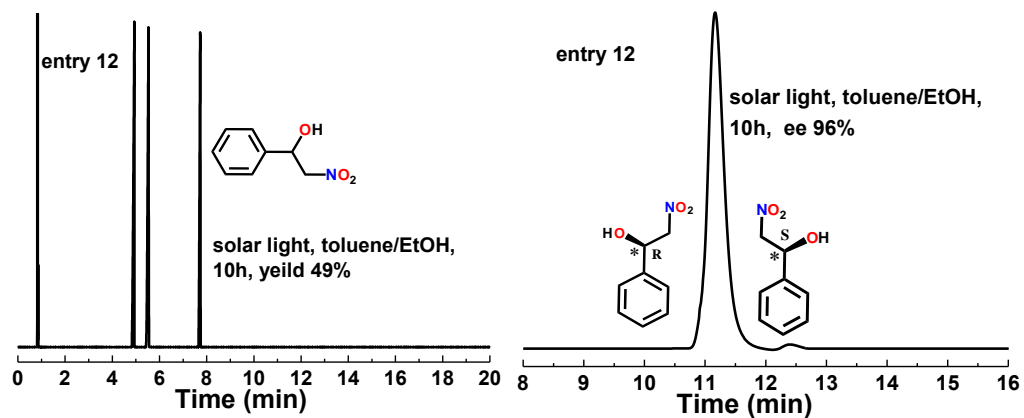

**Supplementary Figure 10.** Yield and enantiomeric excess of the model one-pot asymmetric Henry reaction between benzyl alcohol and nitromethane (for Table 1). Yield was determined by the GC on HP-5 column, enantiomeric excess was determined by HPLC with a Chiralcel OD-H column (90 : 10 = *n*-hexane : isopropanol, 1.0 mL min<sup>-1</sup>, 230 nm), respectively.

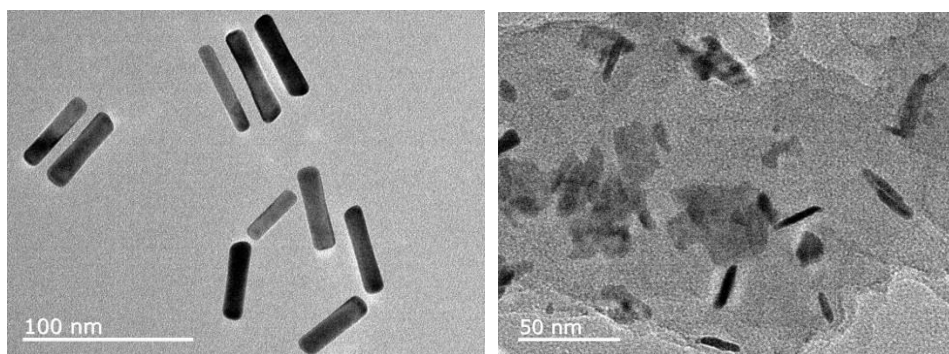

**Supplementary Figure 11.** TEM images of the Au NR (left) and the Au@amorphous polymer (right) which were used to catalyze one-pot asymmetric model Henry reaction between benzyl alcohol and nitromethane.

**Supplementary Table 4.** Summary of the typical asymmetric Henry reactions for PhCHO with CH<sub>3</sub>NO<sub>2</sub>.

| catalyst                                                                                       | conditions                                                                                              | recycle | yield (ee ) | TON  | ref.             |
|------------------------------------------------------------------------------------------------|---------------------------------------------------------------------------------------------------------|---------|-------------|------|------------------|
| silica-supported (SBA-15) copper complex                                                       | EtOH, organic bases(S)/r.t./40 h                                                                        | 3       | 97 (97)     | 9.7  | 2                |
| iPr-bipiperidine/Cu(OAc) <sub>2</sub>                                                          | MeOH/H <sub>2</sub> O/-25 °C/40 h                                                                       | 0       | 93 (94)     | 9.3  | 3                |
| bis(oxazoline)-Cu(OAc) <sub>2</sub>                                                            | EtOH /r.t./22 h                                                                                         | 0       | 76 (94)     | 15.2 | 4                |
| ( <i>R, R</i> )-Cu/Sm/aminophenol sulfonamide                                                  | THF/-30 °C/90 h                                                                                         | 0       | 90 (93)     | 9.0  | 5                |
| sulfolobus tokodaii (ST0779)                                                                   | H <sub>2</sub> O, TBME 1:4/40 °C/90 h                                                                   | 0       | 34 (17)     |      | 6                |
| pH chitosan hydrogel beads (CSHB)                                                              | H <sub>2</sub> O/r.t./24 h                                                                              | 3       | 91 (99)     | 5353 | 7                |
| [(Bisurea-salen)Co]                                                                            | CH <sub>2</sub> Cl <sub>2</sub> , DIEPA/-70 °C/24 h                                                     | 0       | 85 (97)     | 17   | 8                |
| 1,2-amino phosphinamide-Zn(II)                                                                 | C <sub>7</sub> H <sub>8</sub> /-20 °C/48 h                                                              | 0       | 99 (92)     | 9.9  | 9                |
| <i>trans</i> - <i>N, N'</i> -bis-biphenyl-4-ylmethyl-cyclohexane-1,2-diamine-CuCl <sub>2</sub> | AcOEt/Et <sub>3</sub> N/0 °C/24 h                                                                       | 0       | 87 (91)     | 8.7  | 10               |
| bis(thiourea) ( <i>R<sub>p</sub></i> )-1                                                       | THF/ <i>i</i> -Pr <sub>2</sub> NEt/0 °C/24 h                                                            | 0       | 57 (90)     | 11.4 | 11               |
| per-6-ABCD                                                                                     | ACN/H <sub>2</sub> O (1:1)/-20 °C/7 h                                                                   | 6       | 98 (90)     | 0.98 | 12               |
| (CuOTf) <sub>2</sub> (+)-tetrahydrosalen ligand                                                | methanol/40 °C/20 h                                                                                     | 0       | 90 (92)     | 9.0  | 13               |
| Cu(I)-[H <sub>4</sub> ]salen                                                                   | 4 Å MS, MeOH/ 45 °C/60 h                                                                                | 0       | 64 (92)     | 6.4  | 14               |
| amino alcohol-copper(II)                                                                       | Et <sub>2</sub> O/r.t./48 h                                                                             | 0       | 66 (98)     | 26.4 | 15               |
| NA-MgO                                                                                         | THF/25 °C/10 h                                                                                          | 4       | 95 (90)     | 36.5 | 16               |
| bispidine-CuCl <sub>2</sub>                                                                    | NEt <sub>3</sub> , THF, MeNO <sub>2</sub> /-20 °C/42 h                                                  | 0       | 99 (98)     | 49.5 | 17               |
| bisoxazolidine-CuOAc                                                                           | EtOH/-15 °C/16 h                                                                                        | 0       | 93 (89)     | 9.3  | 18               |
| Thiourea compound                                                                              | THF/-20 °C/48 h                                                                                         | 0       | 90 (92)     | 9.0  | 19               |
| Pd@CCOF-MPC                                                                                    | K <sub>2</sub> CO <sub>3</sub> , EtOH /r. t./8 h                                                        | 4       | 97 (95)     | 48.5 | 20               |
| <b>Au@CCOF-CuTPP (2)</b>                                                                       | (reaction starting from benzyl alcohol),<br>K <sub>2</sub> CO <sub>3</sub> /PhMe, EtOH/ <i>hν</i> /10 h | 4       | 98 (98)     | 98   | <b>this work</b> |

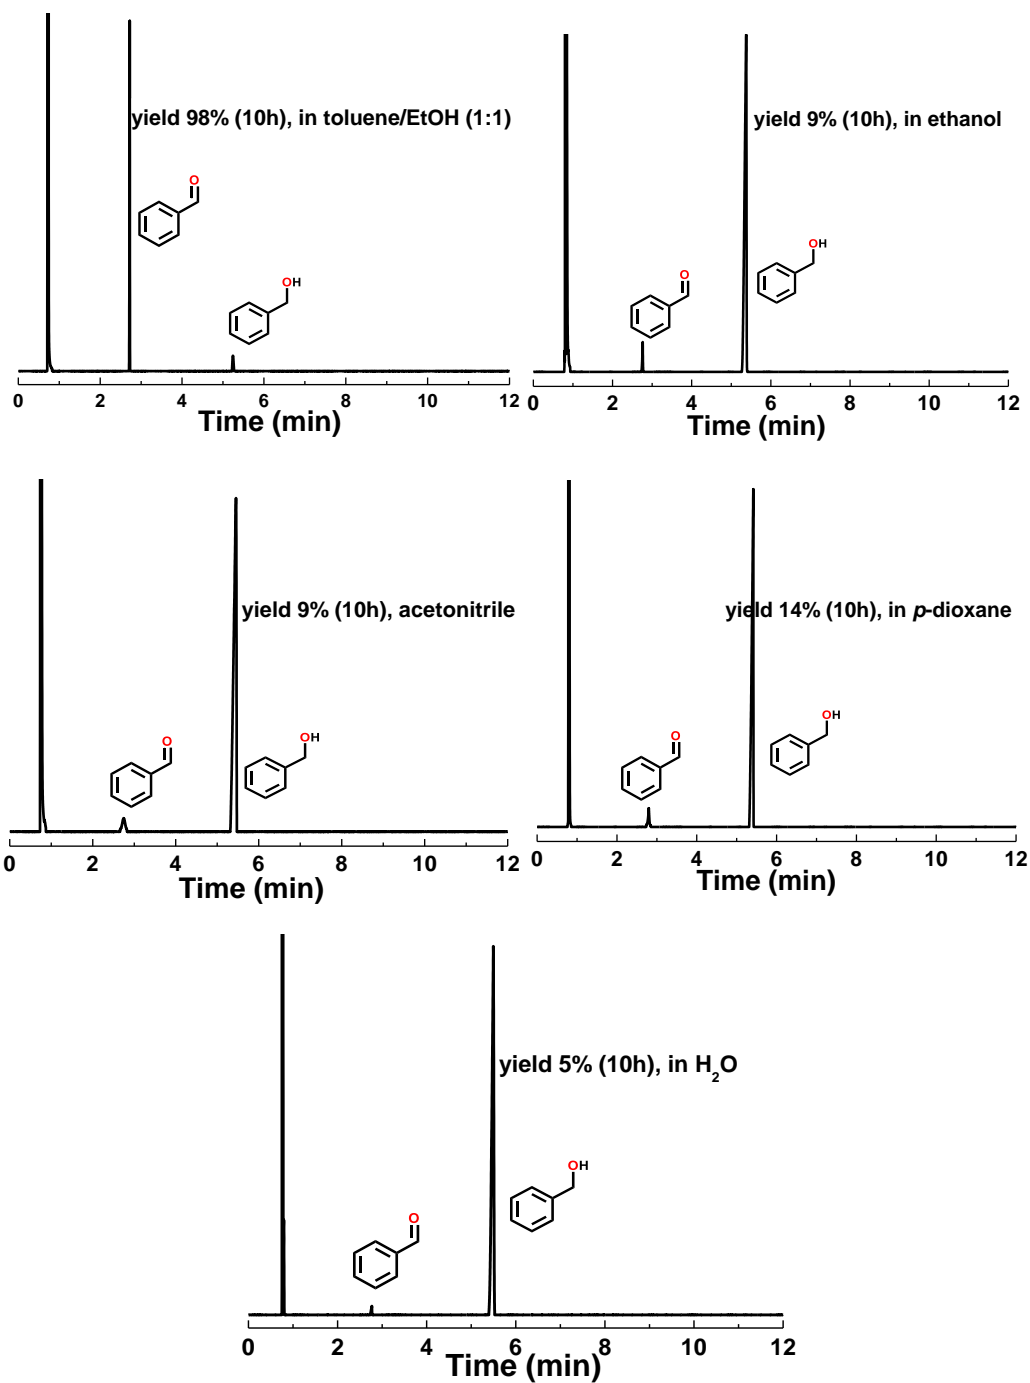

**Supplementary Figure 12.** GC analysis of the 2-catalyzed selective benzyl alcohol oxidation in air using different solvents with light irradiation ( $\lambda > 400$  nm, 300 W xenon with a power density of  $2.5 \text{ W cm}^{-2}$ ).

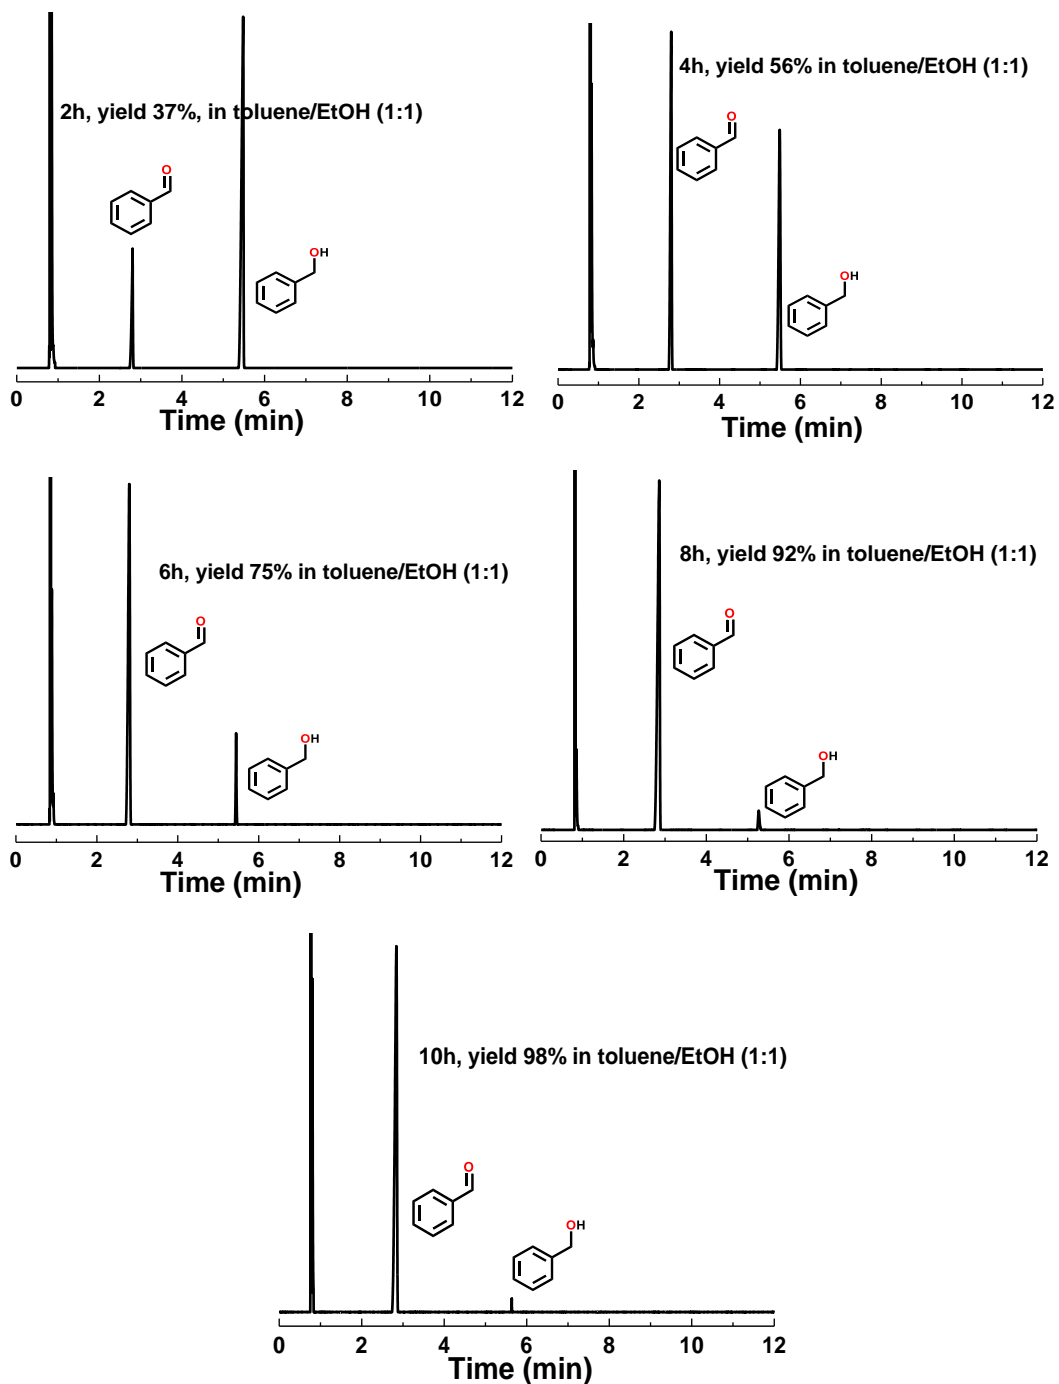

**Supplementary Figure 13.** GC analysis of the selective benzyl alcohol oxidation in air with light irradiation ( $\lambda > 400$  nm, 300 W xenon with a power density of  $2.5 \text{ W cm}^{-2}$ ) catalyzed by **2**: the relationship between time and yield.

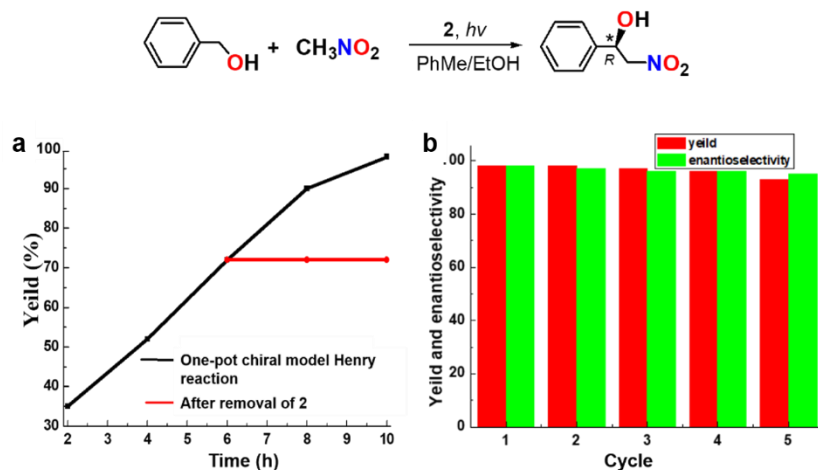

**Supplementary Figure 14.** **a**, Reaction time examination (black line) and leaching test (red line) for model one-pot asymmetric Henry reaction. **b**, Catalytic cycles. After each run, the catalyst was collected by centrifugation, washed with ethanol and dichloromethane, dried at 90 °C in vacuum for the next catalytic run under the same conditions. Reaction conditions: **2** (6 mg, 1 mol % Au equiv), aromatic alcohol (0.5 mmol), nitromethane (1.5 mmol), K<sub>2</sub>CO<sub>3</sub> (1.5 mmol), toluene/EtOH (1:1, 2 mL), room temperature, visible light ( $\lambda > 400$  nm, 300 W xenon with a power density of 2.5 W cm<sup>-2</sup>), 10 h. The solid catalyst was filtrated from the reaction solution after 6 h, whereas the filtrate was transferred to a new vial and the reaction was carried out under the same conditions for an additional 4 h. Yield was determined by the GC measurement on HP-5 column, and enantiomeric excess was determined by HPLC with a Chiralcel OD-H column (90 : 10 = *n*-hexane : isopropanol, 1.0 mL min<sup>-1</sup>, 230 nm), respectively.

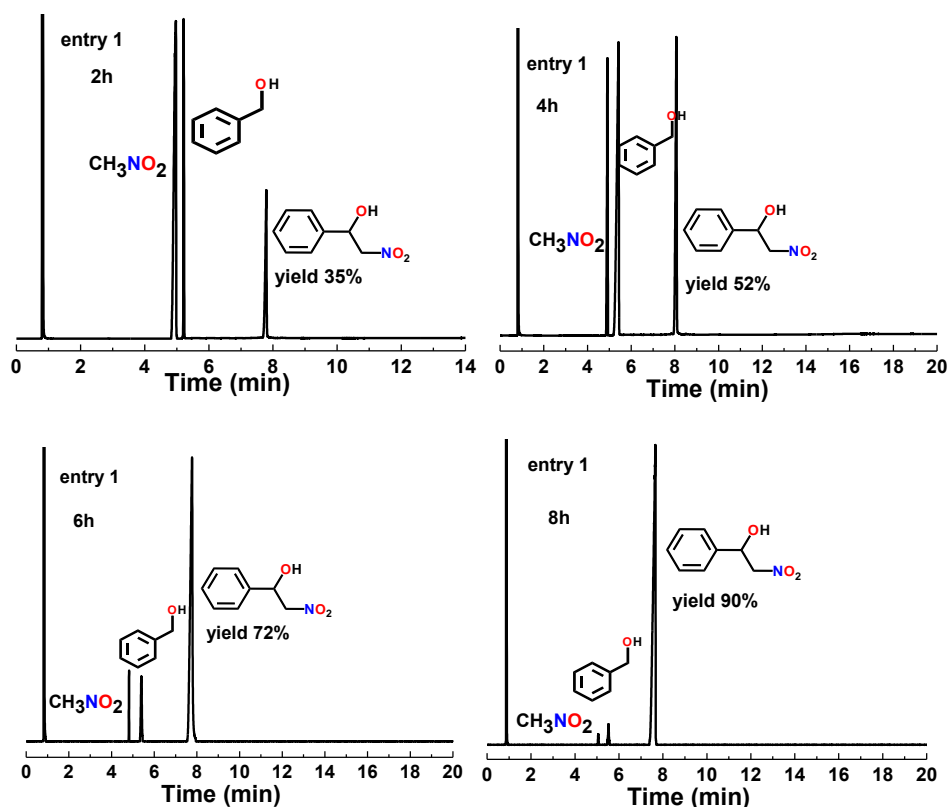

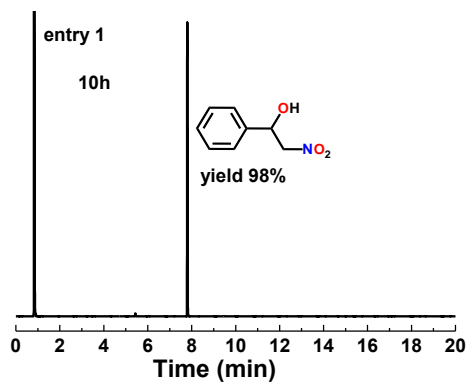

**Supplementary Figure 15.** GC analysis for the model one-pot asymmetric Henry reaction catalyzed by **2**: the relationship between time and yield.

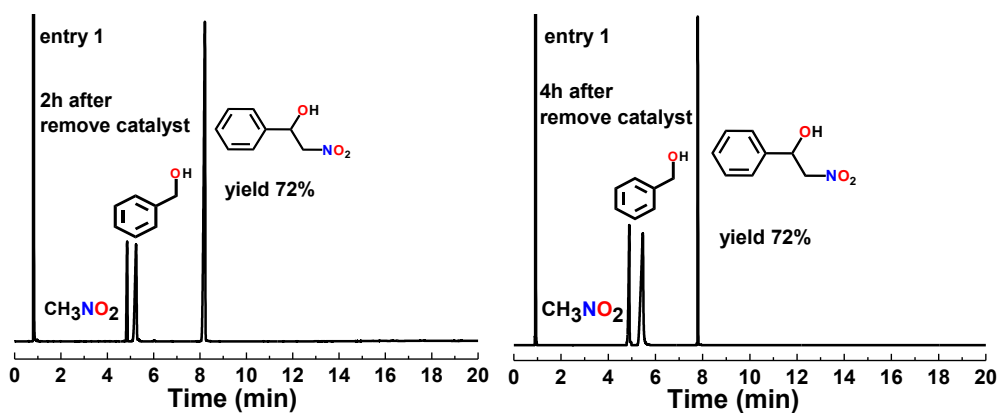

**Supplementary Figure 16.** Hot leaching test. The GC analysis for the model one-pot asymmetric Henry reaction without **2**.

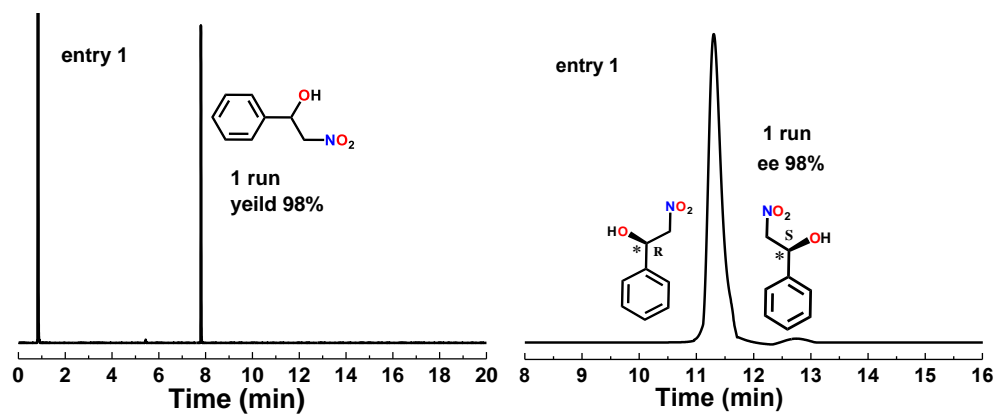

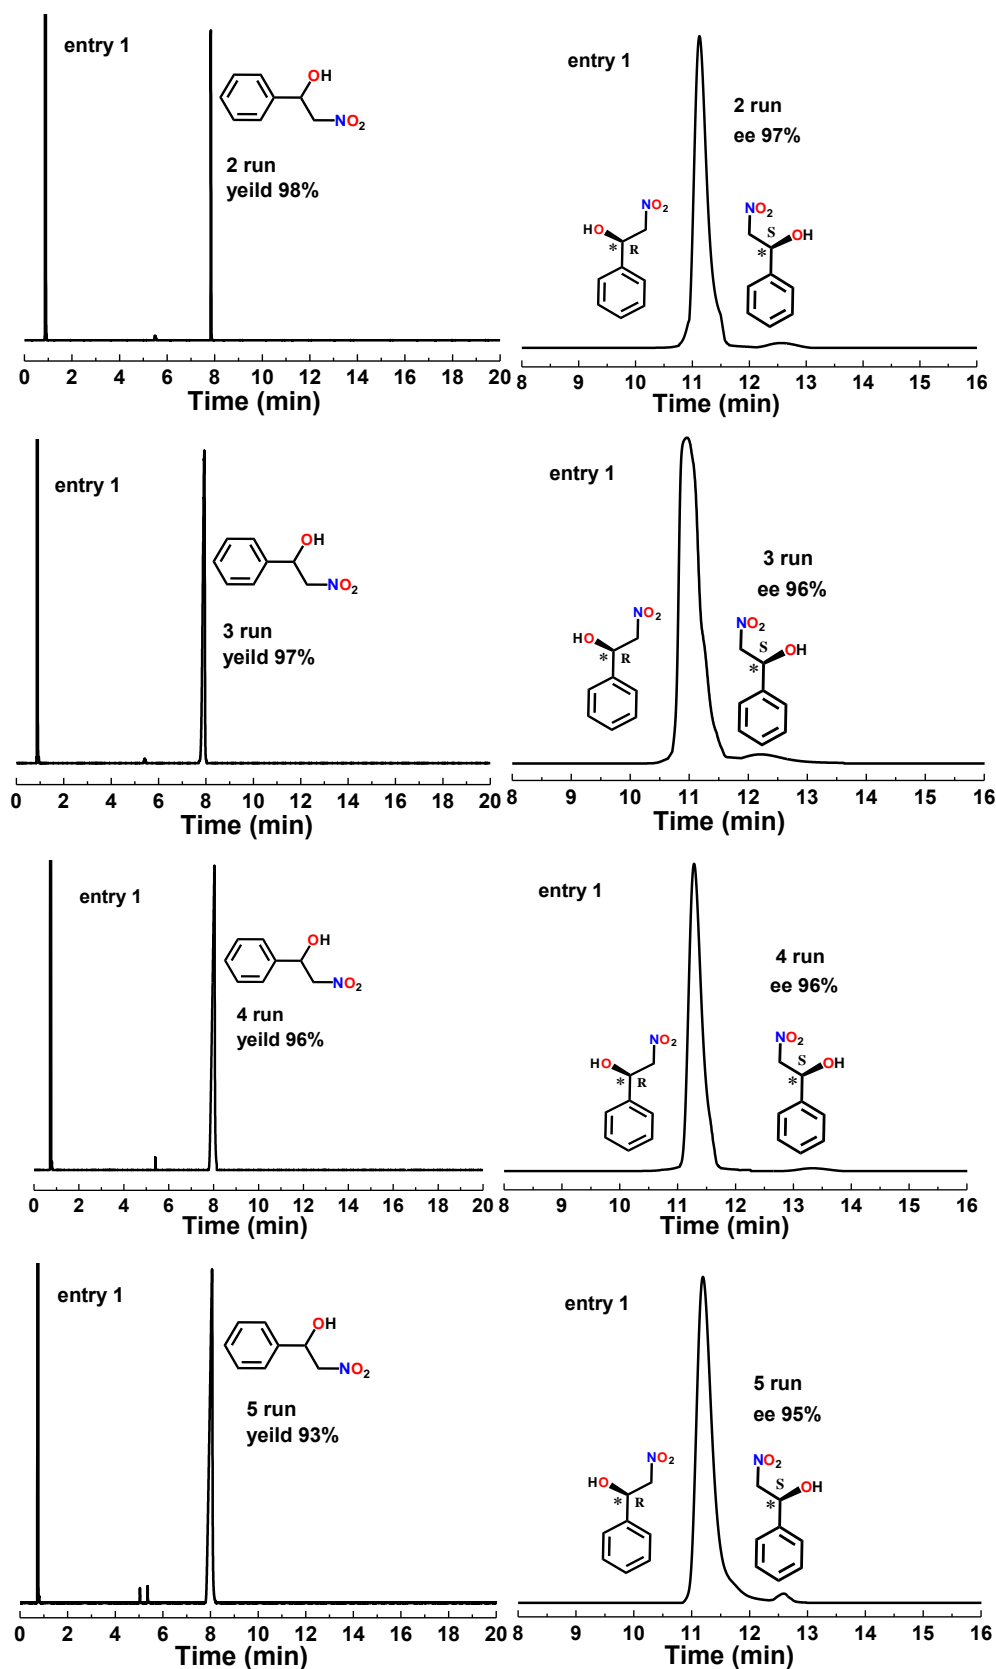

**Supplementary Figure 17.** Catalytic cycles for the model one-pot asymmetric Henry reaction. Yield was determined by the GC on HP-5 column, and enantiomeric excess was determined by HPLC with a Chiralcel OD-H column (90 : 10 = n-hexane : isopropanol, 1.0 mL min<sup>-1</sup>, 230 nm).

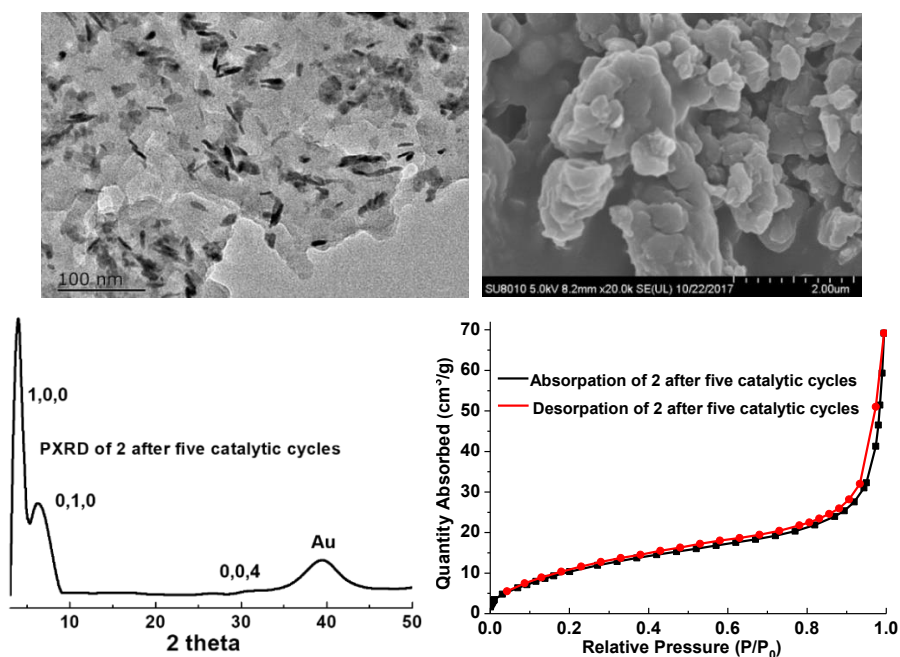

**Supplementary Figure 18.** TEM, SEM, PXRD and the gas adsorption-desorption of **2** after five catalytic cycles. The Au amount in **2** determined by ICP is 15.1 wt% after five catalytic cycles. No structural and morphology changes were observed after five catalytic cycles. The adsorption-desorption value slightly decreased from  $79.4 \text{ cm}^3 \text{ g}^{-1}$  (before catalysis) to  $69.2 \text{ cm}^3 \text{ g}^{-1}$  for **2** after five catalytic cycles.

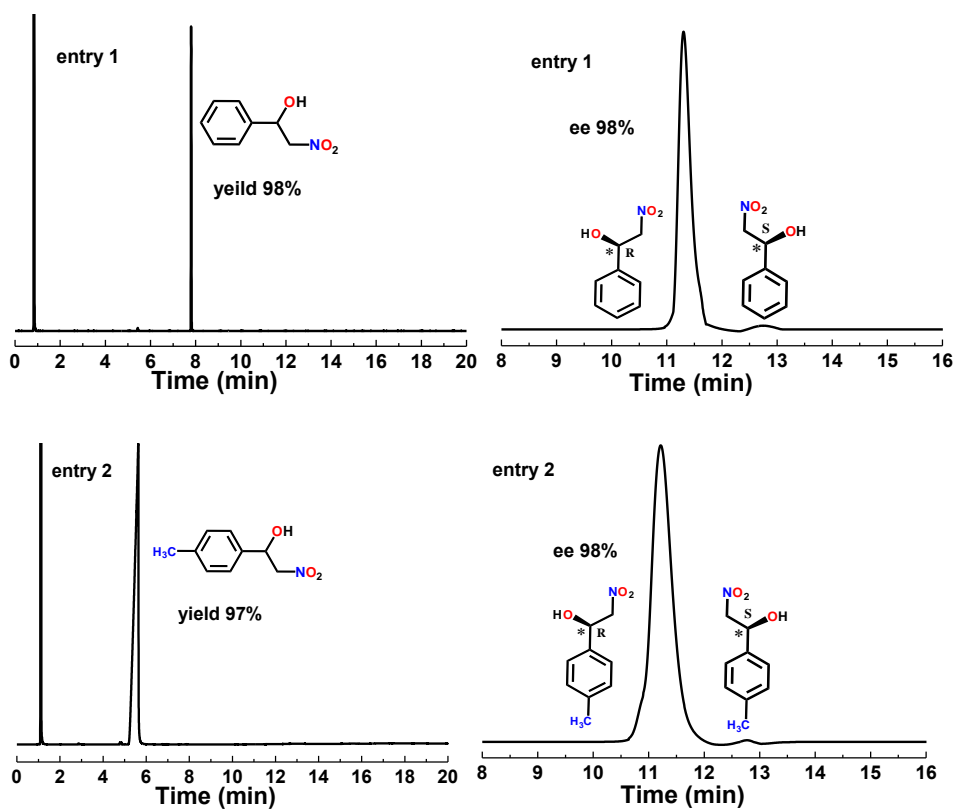



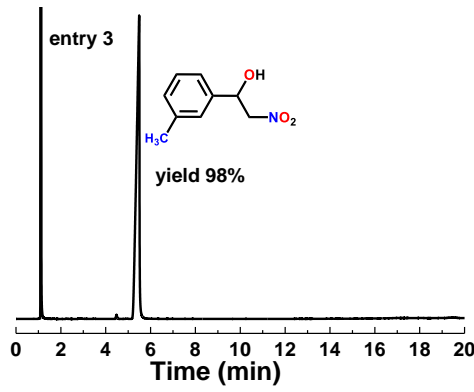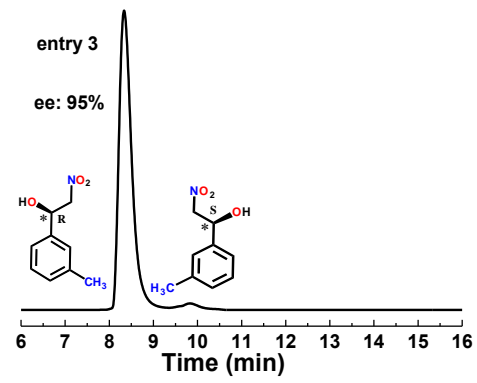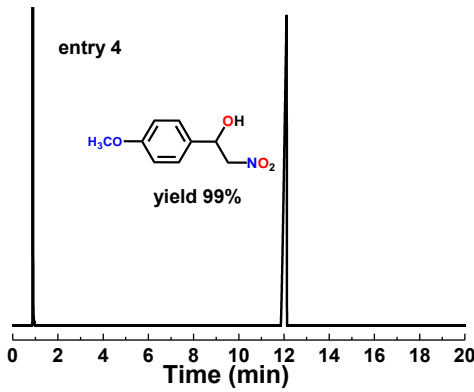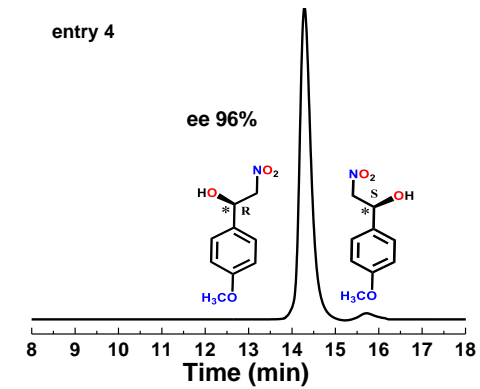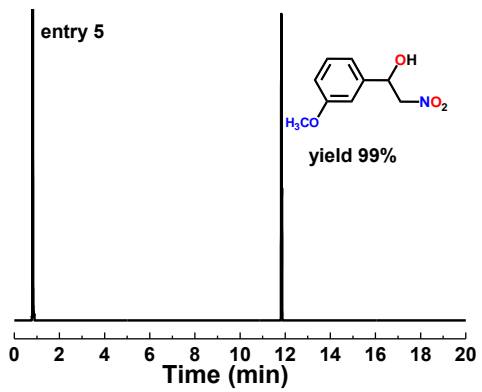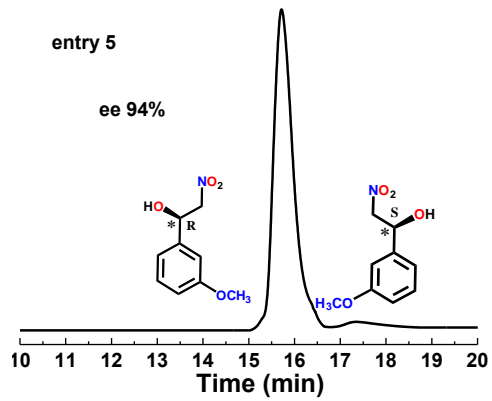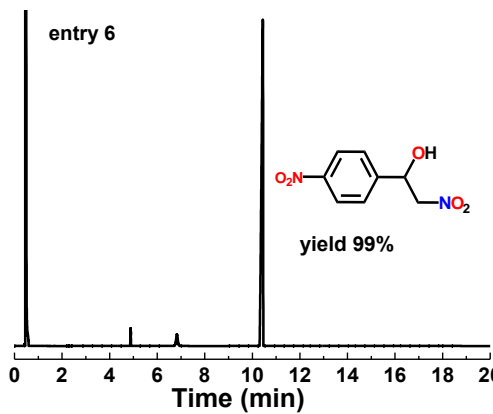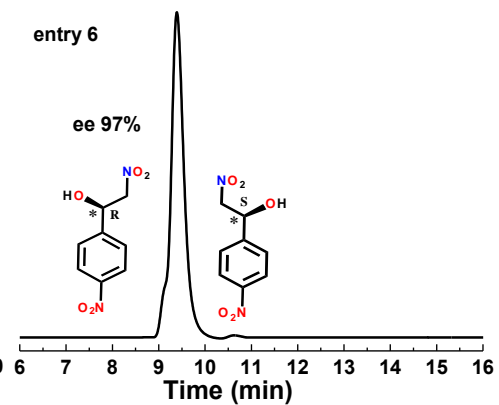

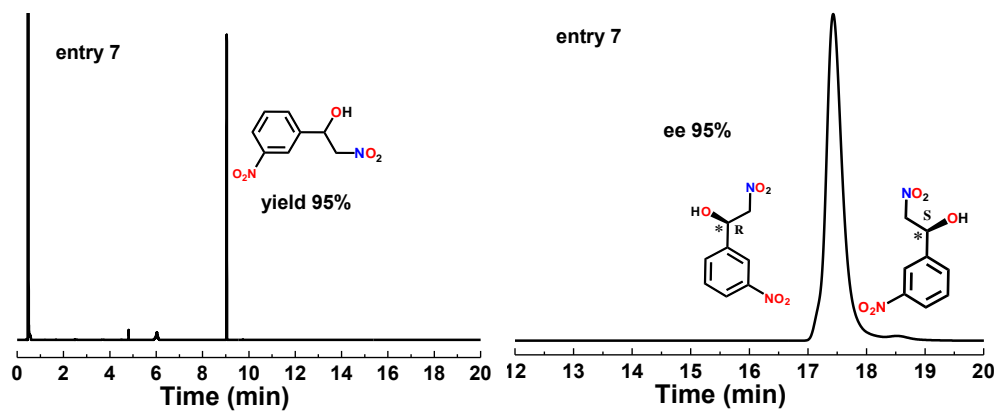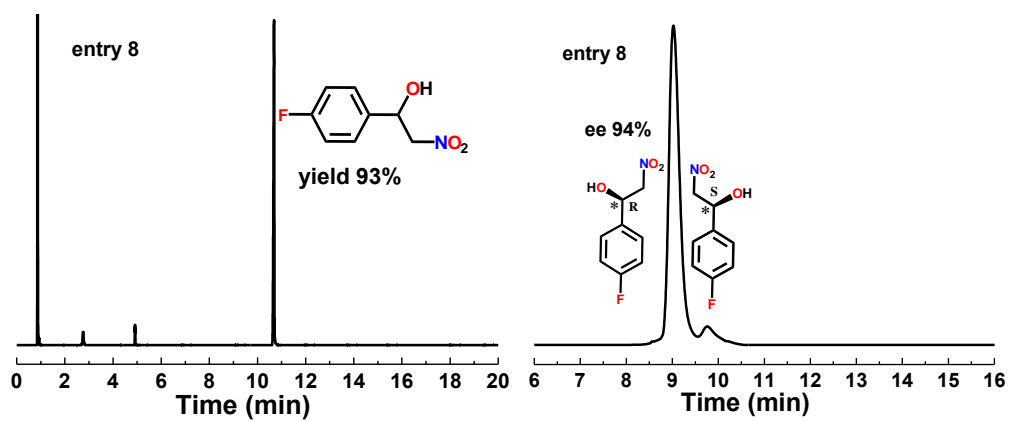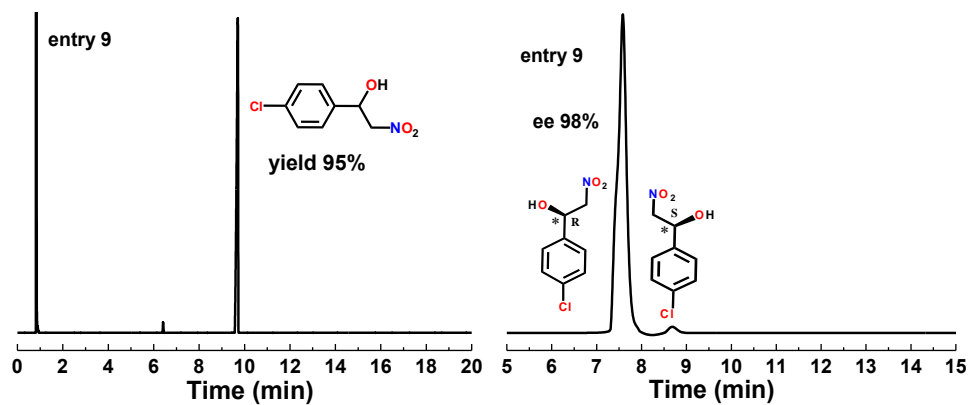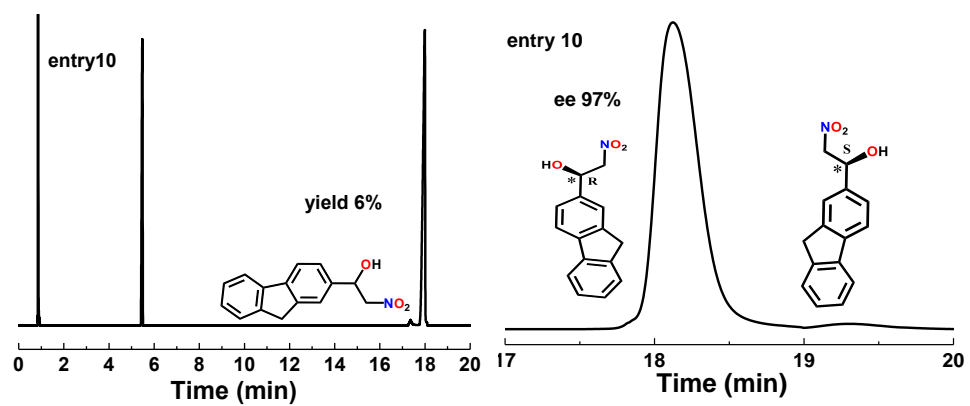

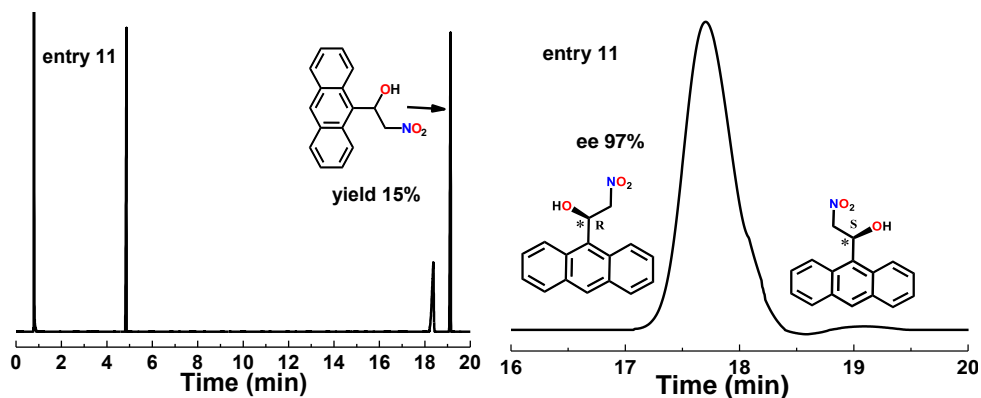

**Supplementary Figure 19.** GC and HPLC analysis for the expanded one-pot asymmetric Henry reactions catalyzed by **2** based on various substituted substrates (for Table 2).

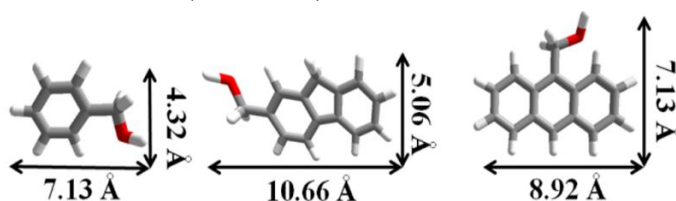

**Supplementary Figure 20.** The size of benzyl alcohol, 9H-fluorene-2-methanol and 9-anthracenemethanol based on their molecular structure.

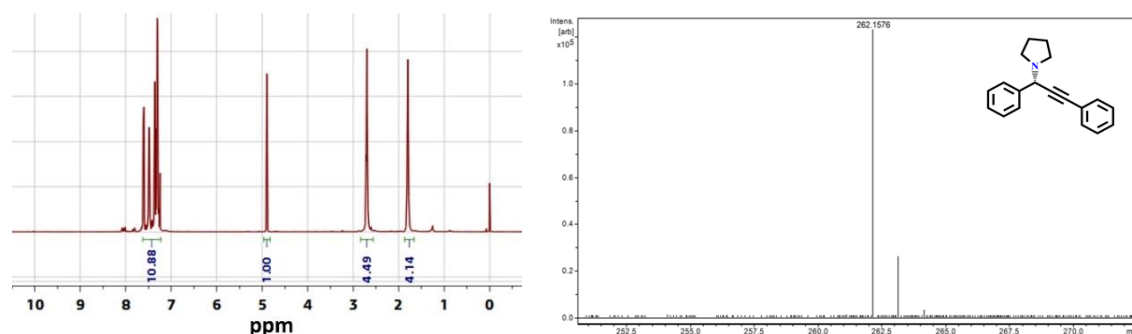

**Supplementary Figure 21.**  $^1\text{H}$  NMR and ESI-MS spectra for the model one-pot asymmetric  $\text{A}^3$ -coupling product. MS (ESI $^+$ ): exact mass calcd for  $\text{C}_{19}\text{H}_{19}\text{N}$ , 261.1517 ( $[\text{M}+\text{H}^+]$ ). Found: 262.1576.

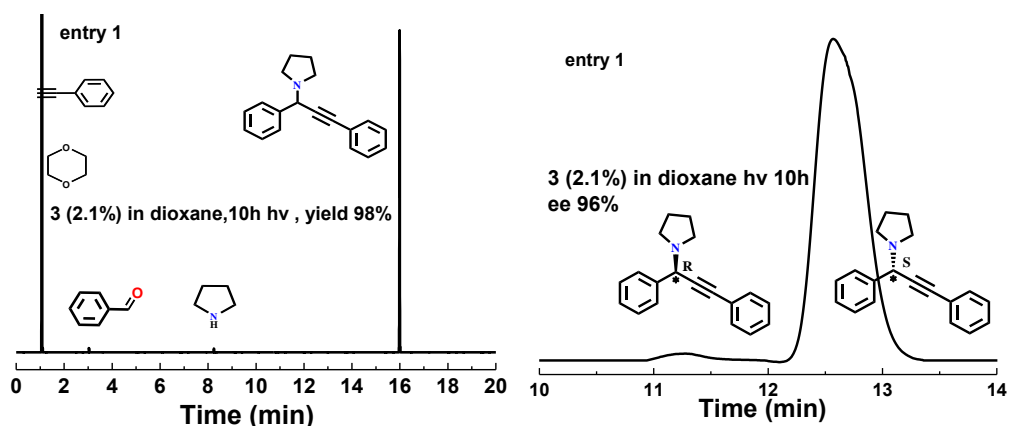

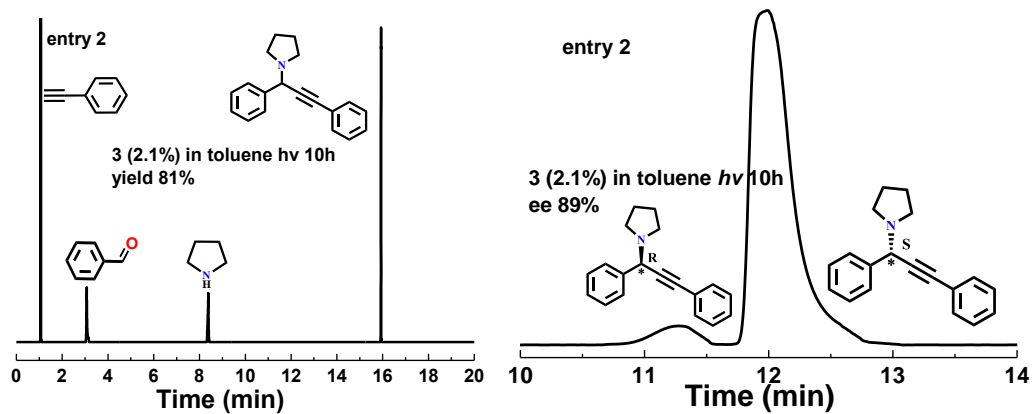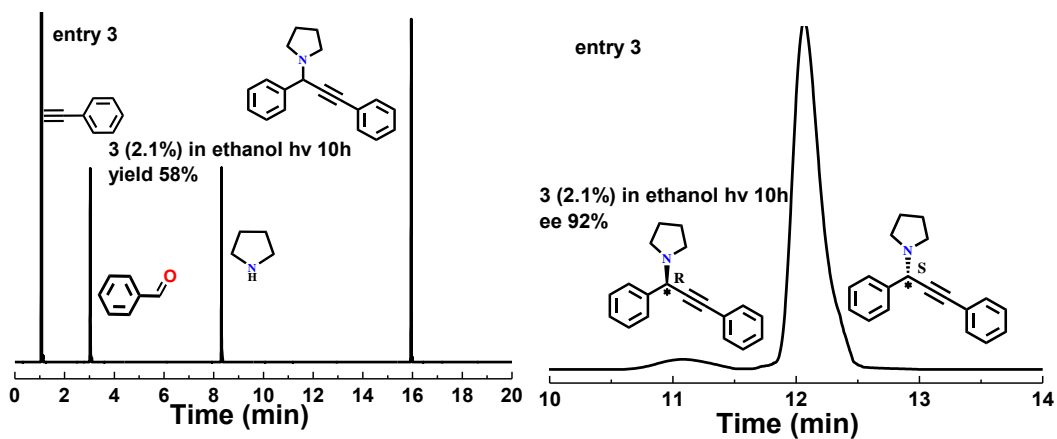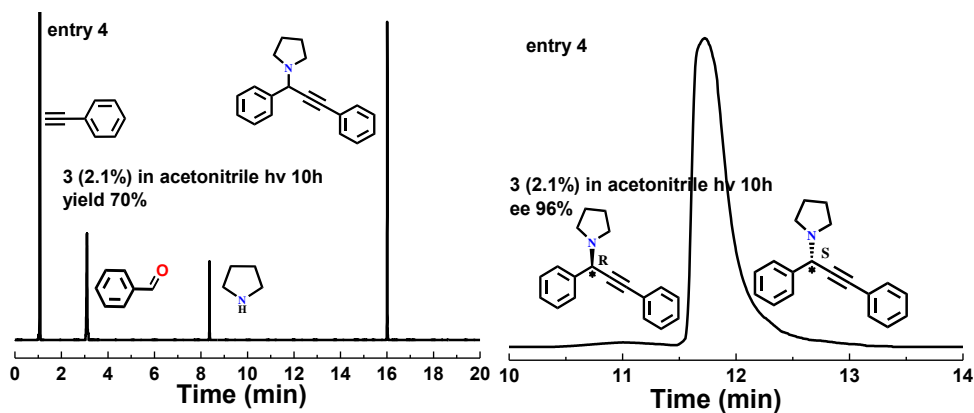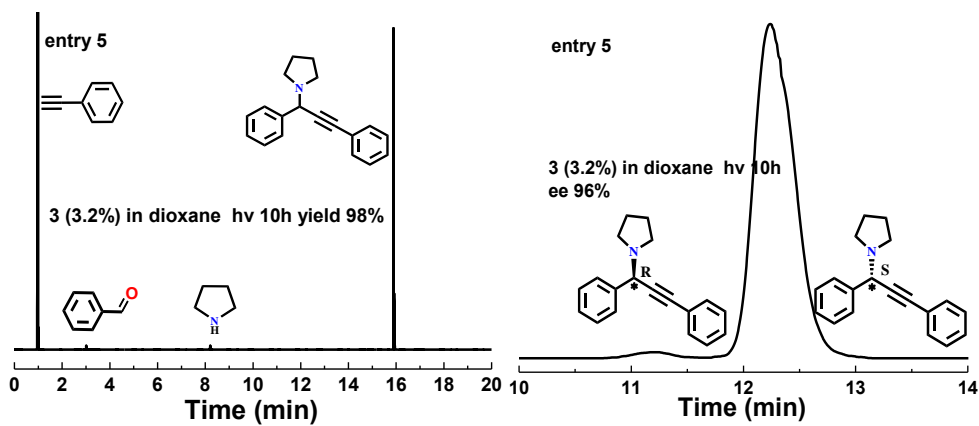

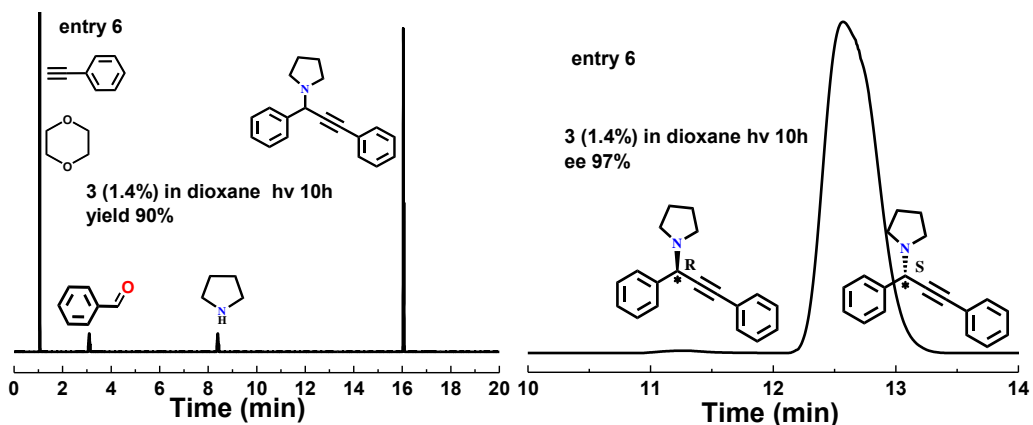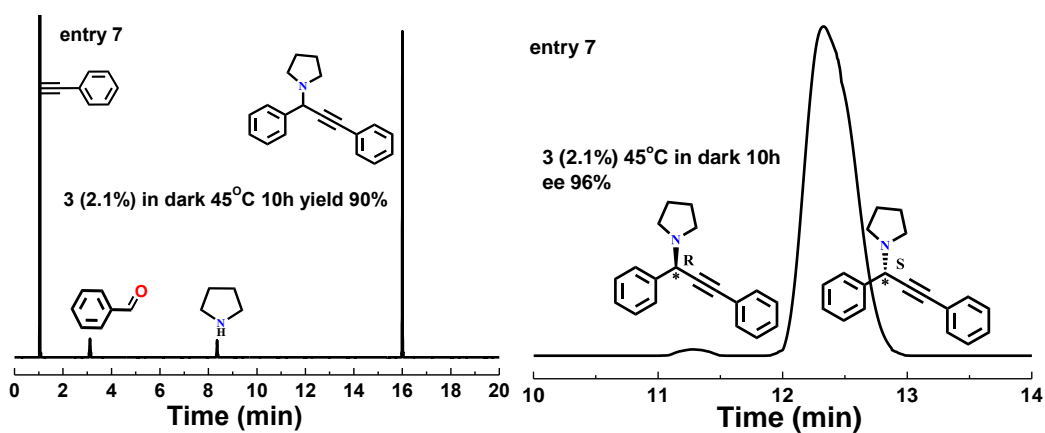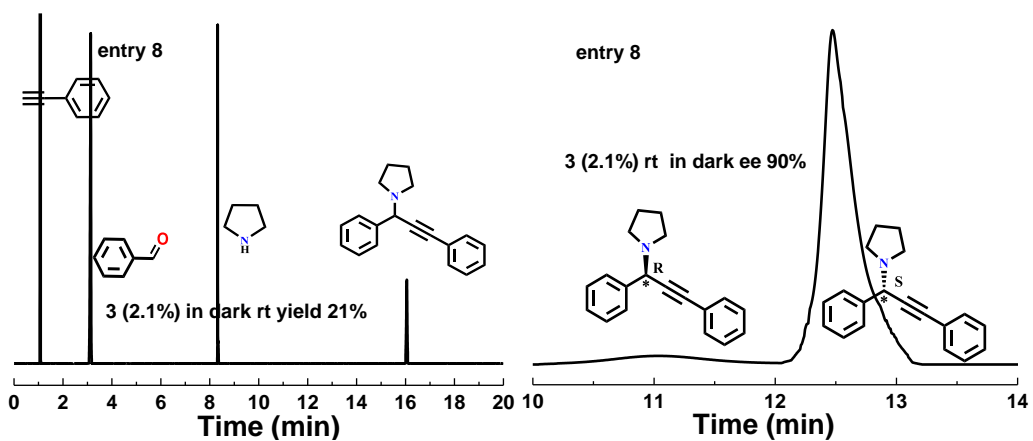

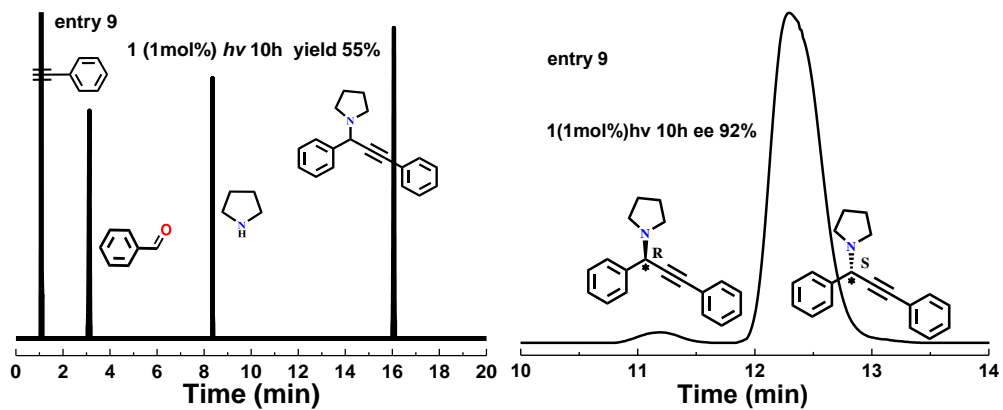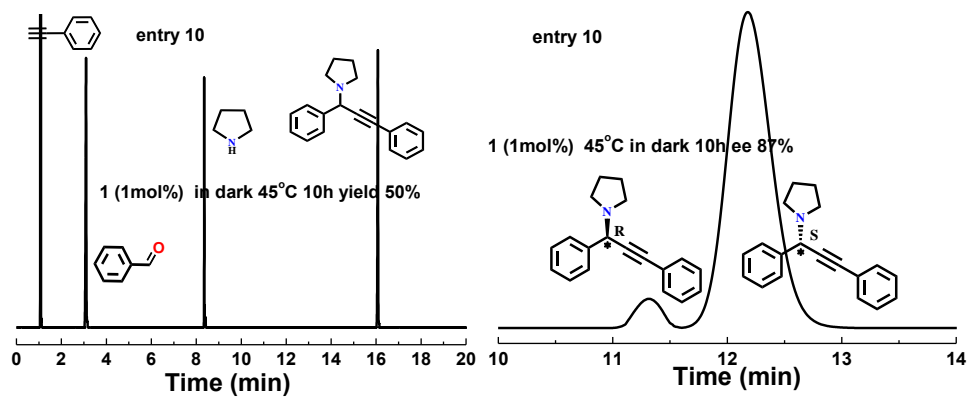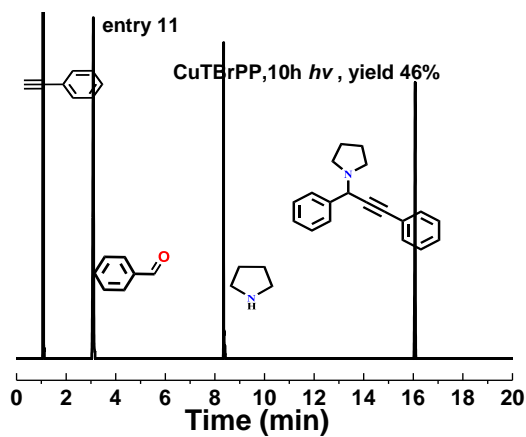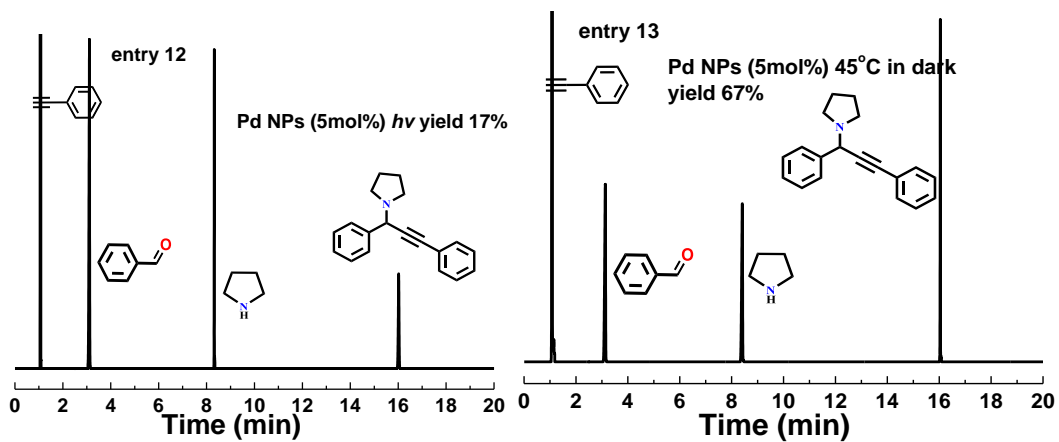

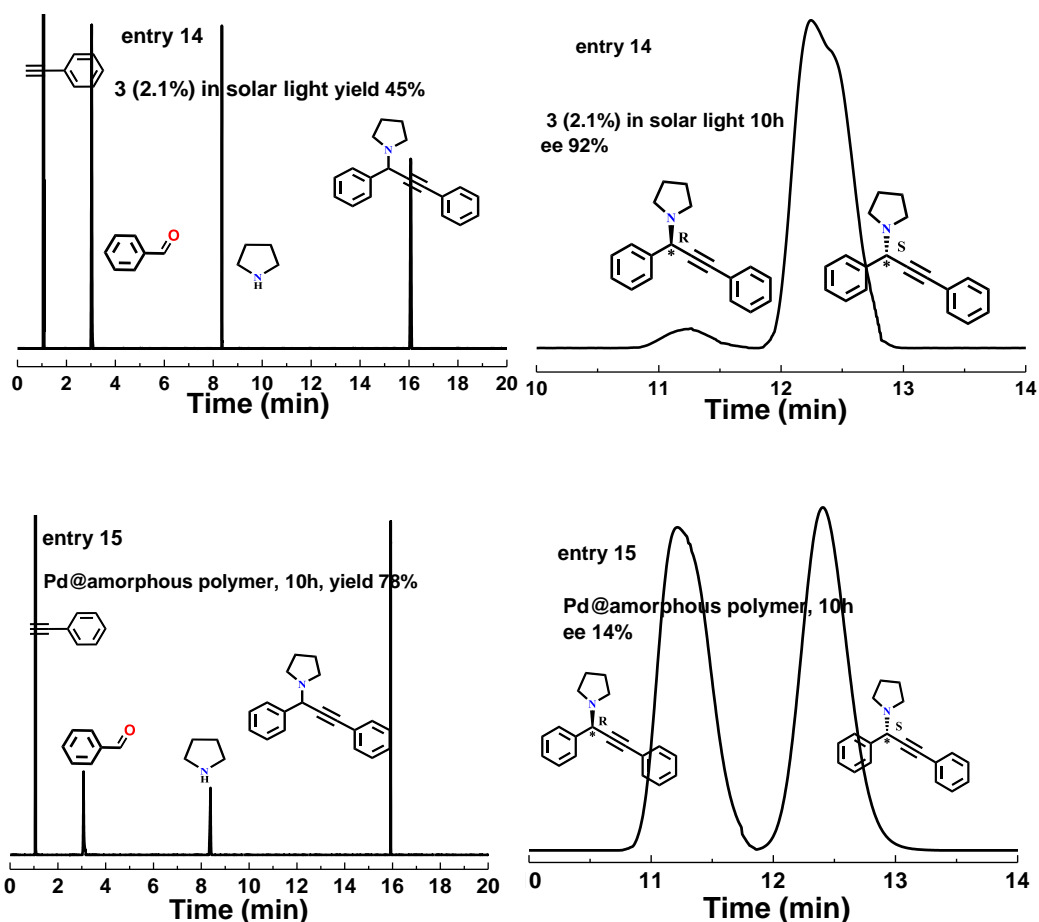

**Supplementary Figure 22.** GC and HPLC analysis of the model one-pot asymmetric A<sup>3</sup>-coupling reaction was carried out under different conditions (for Table 3). Yield was determined by the GC on HP-5 column, and enantiomeric excess was determined by HPLC with a Chiralcel OJ-H column (99 : 1 = *n*-hexane : isopropanol, 1.0 mL min<sup>-1</sup>, 254 nm).

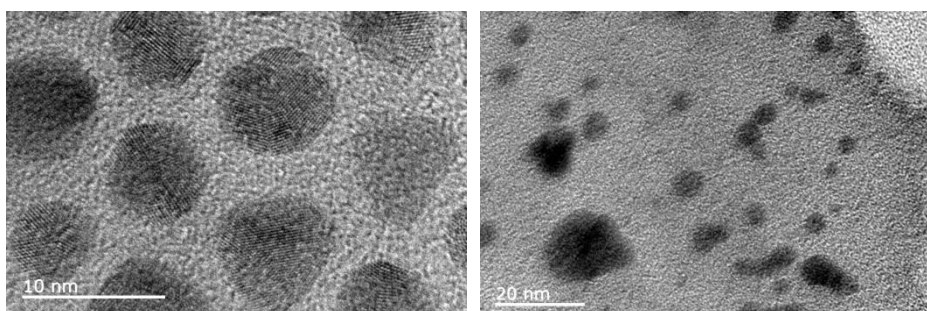

**Supplementary Figure 23.** TEM images of Pd NP (left) and Pd@amorphous polymer (right) used to catalyze the model A<sup>3</sup>-coupling reaction.

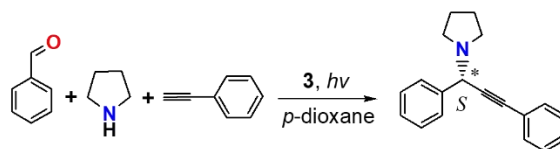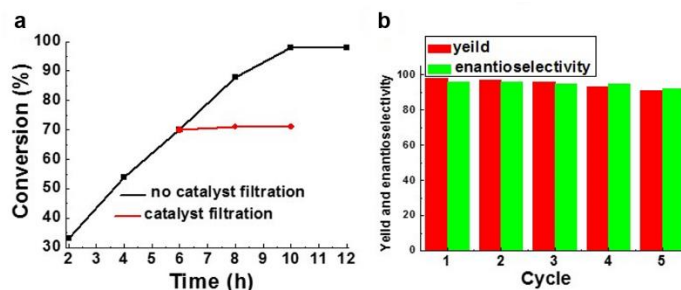

**Supplementary Figure 24.** **a**, Reaction time examination (black line) and leaching test (red line) for the **3**-catalyzed model one-pot chiral A<sup>3</sup>-coupling reaction. **b**, Catalytic cycles for the **3**-catalyzed model one-pot chiral A<sup>3</sup>-coupling reaction. After each run, **3** was collected by centrifugation, washed with ethanol and dichloromethane, dried at 90 °C in vacuum for the next catalytic run under the same conditions. Reaction conditions: under nitrogen, **3** (4.5 mg, 2.1 mol % Pd equiv), benzaldehyde (0.5 mmol), phenylacetylene (0.5 mmol) and pyrrolidine (0.75 mmol) in *p*-dioxane (2 mL) was stirred at room temperature under visible light irradiation ( $\lambda > 400$  nm, 300 W xenon with a power density of 2.5 W cm<sup>-2</sup>). The solid catalyst was filtrated from the reaction solution after 6 h, whereas the filtrate was transferred to a new vial and reaction was carried out under the same conditions for an additional 4 h. Yield was determined by the GC measurement on HP-5 column, and enantiomeric excess was determined by HPLC with a Chiralcel OJ-H column (99 : 1 = *n*-hexane : isopropanol, 1.0 mL min<sup>-1</sup>, 254 nm), respectively.

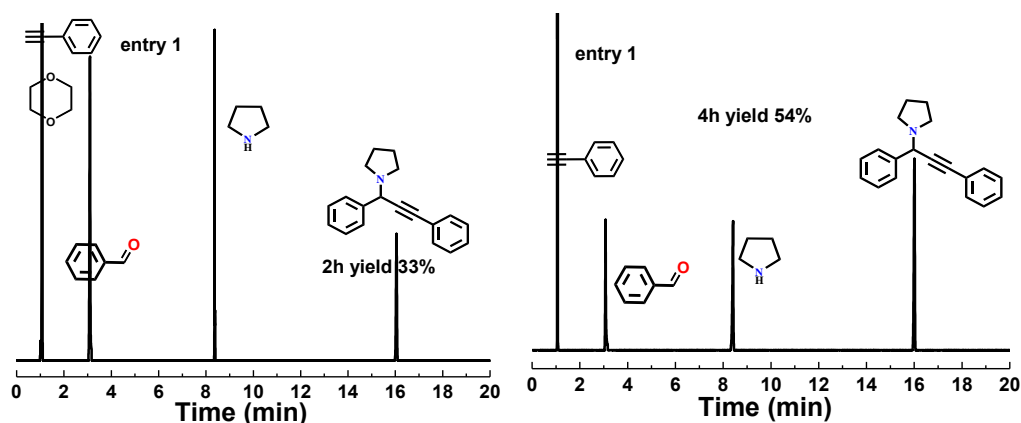



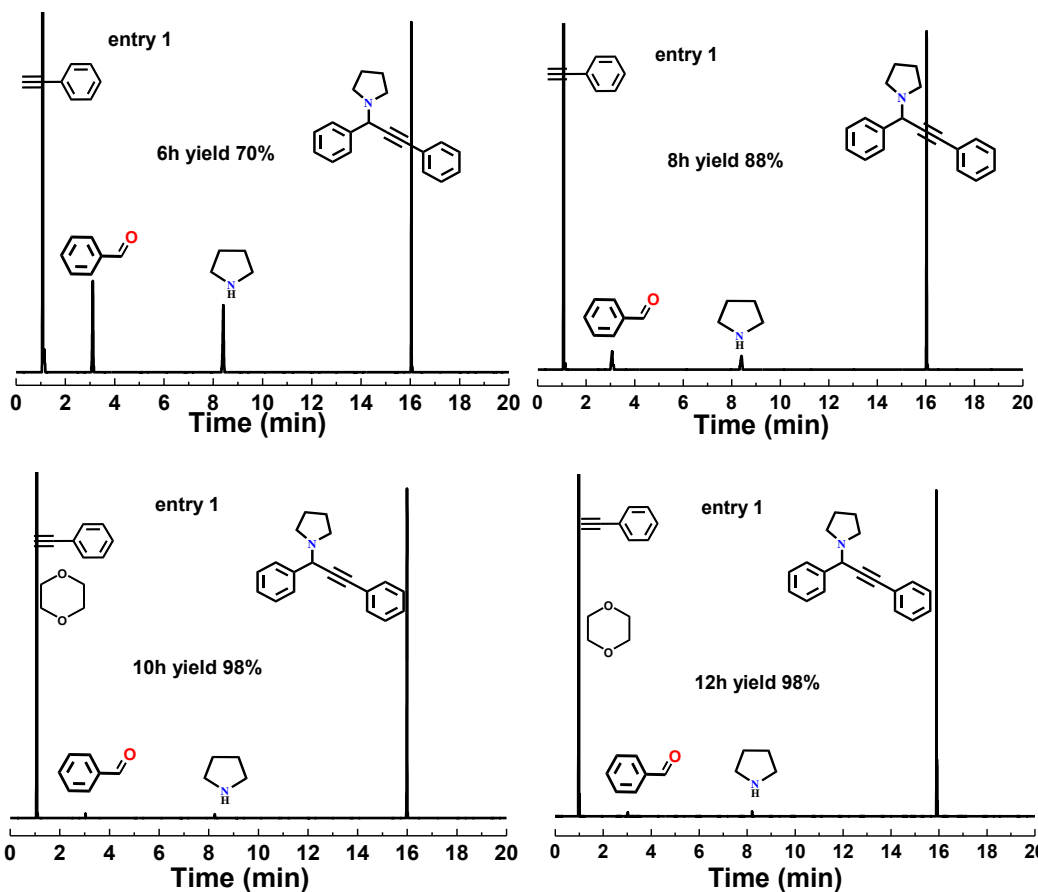

**Supplementary Figure 25.** GC analysis of the model one-pot asymmetric  $A^3$ -coupling reaction catalyzed by **3**: the relationship between time and yield. Yield was determined by the GC on HP-5 column.

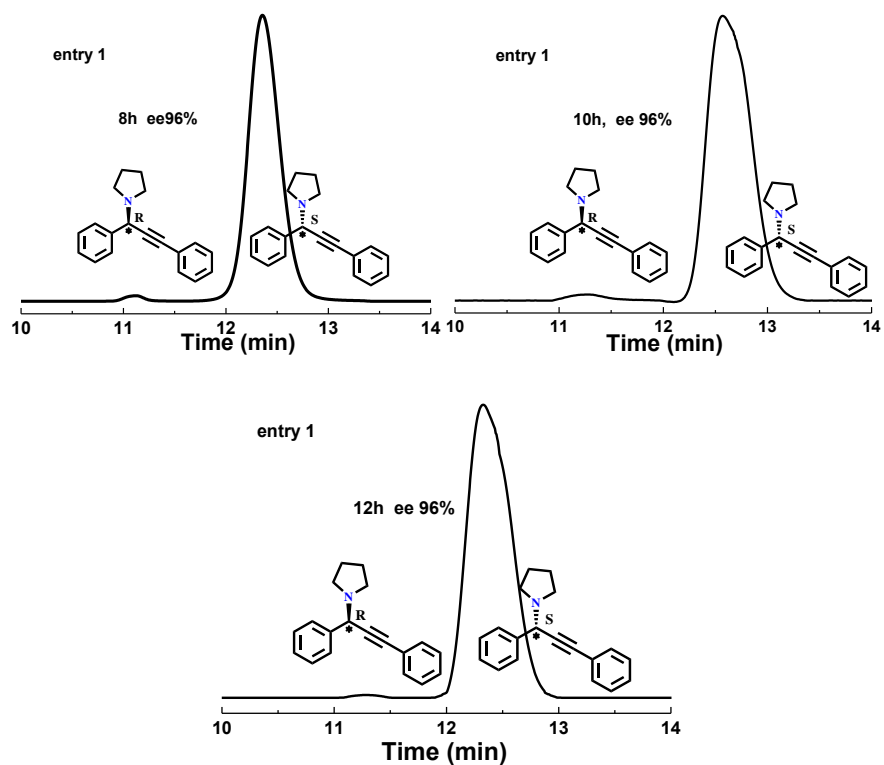

**Supplementary Figure 26.** The corresponding enantiomeric excess of the model one-pot asymmetric  $A^3$ -coupling reaction was monitored by HPLC with a Chiralcel OJ-H column (99 : 1 = *n*-hexane : isopropanol, 1.0 mL min<sup>-1</sup>, 254 nm) at different time.

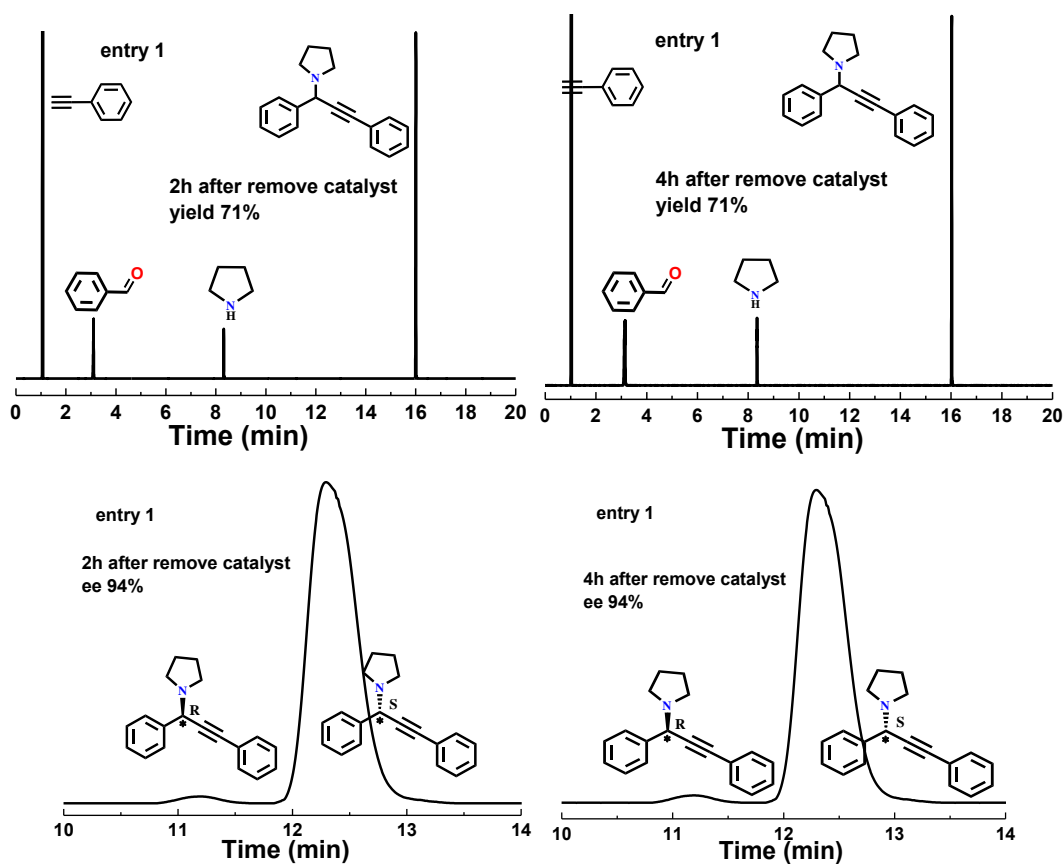

**Supplementary Figure 27.** Hot leaching test. The GC (yield) and HPLC analysis (ee) for the model one-pot asymmetric  $A^3$ -coupling reaction without **3**. Yield was determined by the GC on HP-5 column, and enantiomeric excess was determined by HPLC with a Chiralcel OJ-H column (99 : 1 = *n*-hexane : isopropanol, 1.0 mL min<sup>-1</sup>, 254 nm).

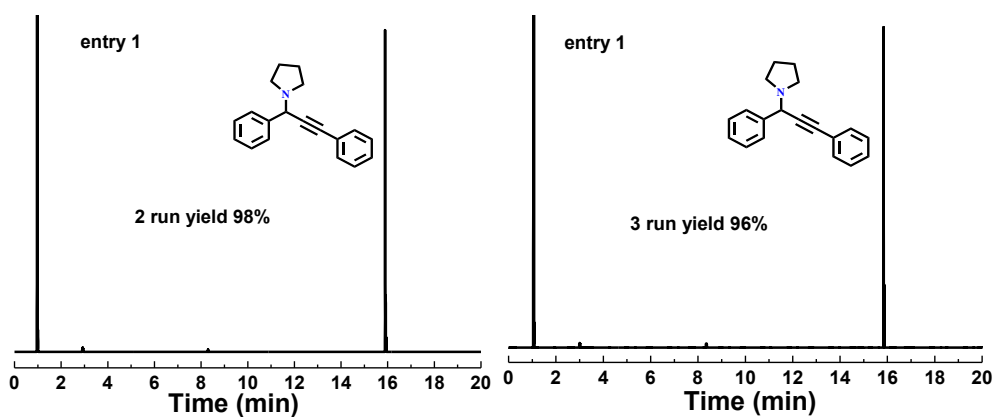

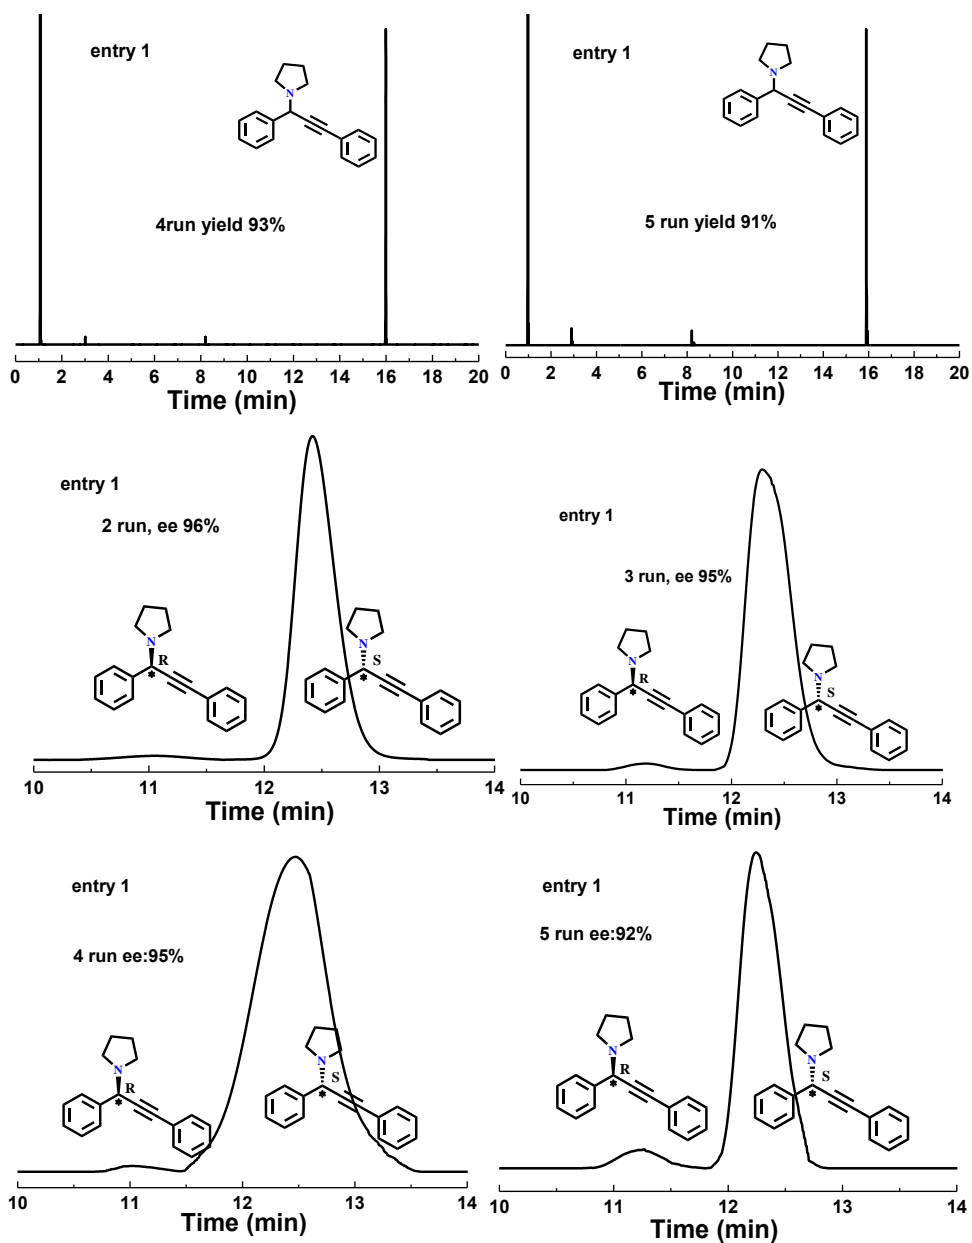

**Supplementary Figure 28.** Catalytic cycle: GC (yield) and HPLC analysis (ee) for the model one-pot asymmetric  $A^3$ -coupling reaction catalyzed by **3**. Yield was determined by the GC on HP-5 column, and enantiomeric excess was determined by HPLC with a Chiralcel OJ-H column (99 : 1 = n-hexane : isopropanol, 1.0 mL min<sup>-1</sup>, 254 nm).

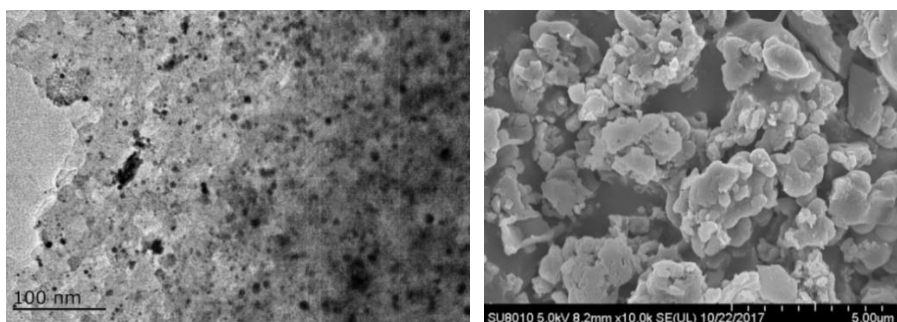

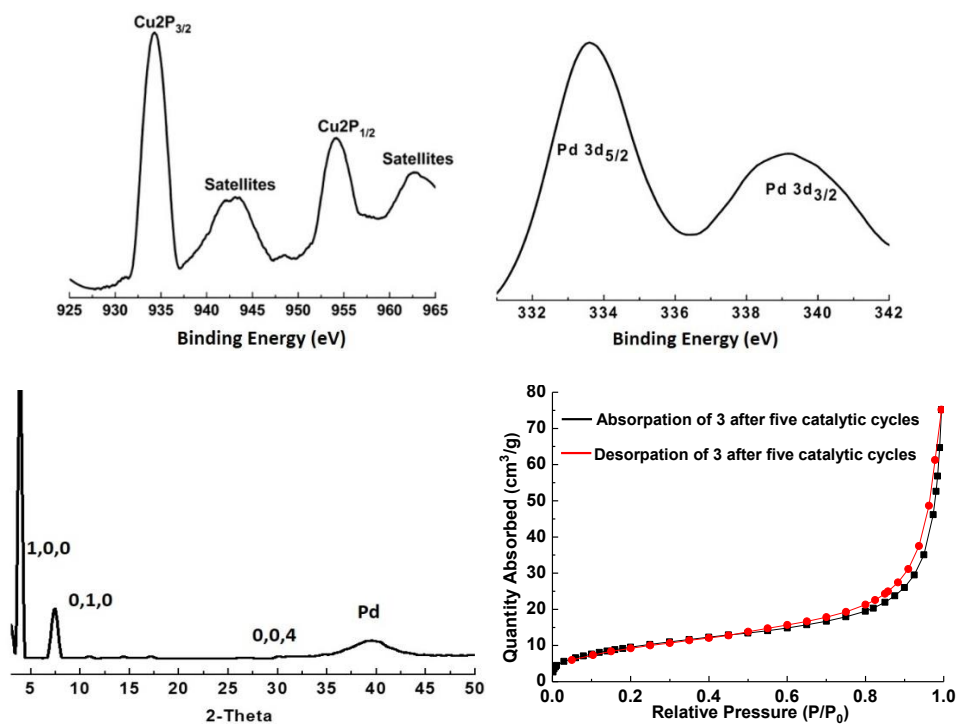

**Supplementary Figure 29.** TEM, SEM, XPS, PXRD and the gas adsorption-desorption of **3** after five catalytic cycles. The Pd amount in **3** determined by ICP analysis after five catalytic cycles is 20.1 wt %. No structural and morphology changes were observed after five catalytic cycles. The adsorption-desorption value slightly decreased from 94.8 cm<sup>3</sup> g<sup>-1</sup> (before catalysis) to 75.2 cm<sup>3</sup> g<sup>-1</sup> for **3** after five cycles.

**Supplementary Table 5.** Comparison of **3** with the reported catalysts for asymmetric A<sup>3</sup>-coupling reactions.

| catalyst                                                                      | conditions                                 | recycle | yield (ee) | TON  | ref.             |
|-------------------------------------------------------------------------------|--------------------------------------------|---------|------------|------|------------------|
| Cu(I)/Acid-Thiourea <sup>a</sup>                                              | CH <sub>2</sub> Cl <sub>2</sub> /0 °C/12 h | 0       | 92 (92)    | 23   | 21               |
| CuBr/(S,S,R <sub>a</sub> )- <b>2a</b> <sup>b</sup>                            | toluene/0 °C/24 h                          | 0       | 89 (98.1)  | 14.8 | 22               |
| Cu(OTf)/tridentate bis(oxazolanyl)Pybox <b>5</b> <sup>c</sup>                 | toluene/35 °C/2 d                          | 0       | 83(93)     | 8.3  | 23               |
| Cu(I)PF <sub>6</sub> /i-Pr-pybox-diPh <sup>d</sup>                            | toluene/rt/ 5 h                            | 0       | 95(85)     | 9.5  | 24               |
| Cu(OTf) <sub>2</sub> /PYBOX ligand <sup>e</sup>                               | DCE/25 °C /15h                             | 0       | 98(94)     | 8.2  | 25               |
| CuBr/(R)-quinap- <b>2</b> <sup>f</sup>                                        | toluene/rt/70 h                            | 0       | 98(86)     | 17.8 | 26               |
| CuBr/(R)-(+)-a-phenethylamine ( <b>5a</b> ) <sup>g</sup>                      | toluene/rt                                 | 0       | 84(98)     | 15.3 | 27               |
| Cu(II)-iPr-pybox-diPh <sup>h</sup>                                            | CHCl <sub>3</sub> /rt/22 h                 | 0       | 89(95)     | 8.9  | 28               |
| CuBr/chiralligand(R)-Quinap <sup>i</sup>                                      | toluene/rt/3 d                             | 3       | 93(82)     | 18.6 | 29               |
| Cu(OTf) <sub>2</sub> /pybox <sup>j</sup>                                      | ball-milling /30 min                       | 5       | 91(96)     | 9.1  | 30               |
| Me <sub>2</sub> Zn/(1R,2S)- <b>22i</b> <sup>k</sup>                           | CH <sub>2</sub> Cl <sub>2</sub> /rt/24 h   | 0       | 85(80)     | 2.1  | 31               |
| (CuOTf) <sub>2</sub> ·toluene/ <i>N</i> -benzoyl pybim <b>1b</b> <sup>l</sup> | CH <sub>2</sub> Cl <sub>2</sub> /rt/36 h   | 0       | 93(98)     | 9.3  | 32               |
| CuBr/rac- <b>7</b> <sup>m</sup>                                               | toluene/0 °C /24 h                         | 0       | 95(97)     | 0.95 | 33               |
| CuBr/rac-StackPhos <sup>n</sup>                                               | CH <sub>2</sub> Cl <sub>2</sub> /rt/24 h   | 0       | 85(94)     | 15.4 | 34               |
| CuBr/(R,R)-1 (PINAP) <sup>o</sup>                                             | toluene/rt/22h                             | 0       | 88(96)     | 16   | 35               |
| <b>Pd@CCOF-CuTPP (3)</b> <sup>p</sup>                                         | dioxane/hv/ 10 h                           | 4       | 98(96)     | 46.7 | <b>this work</b> |

<sup>a</sup> benzaldehyde, pyrrolidine and phenylacetylene

<sup>b</sup> isobutyraldehyde, dibenzylamine and trimethylsilylacetylene

<sup>c</sup> aldehyde, aniline and alkene

- <sup>d</sup> benzaldehyde, aniline and phenylacetylene  
<sup>e</sup> aldehyde, phenylacetylene and aniline  
<sup>f</sup> phenylacetylene, 3-methylbutanal and dibenzylamine  
<sup>g</sup> isobutyraldehyde, HNBN<sub>2</sub> and trimethylsilylacetylene  
<sup>h</sup> methyl 2-formylbenzoate, aniline and alkyne  
<sup>i</sup> benzaldehyde, HNBN<sub>2</sub> and trimethylsilylacetylene  
<sup>j</sup> benzaldehyde, aniline and phenylacetylene  
<sup>k</sup> *p*-chlorobenzaldehyde, *o*-methoxyaniline and phenylacetylene  
<sup>l</sup> PhCHO, *p*-anisidine, 4-phenylbutyne  
<sup>m</sup> cyclohexanecarboxyaldehyde, HNBN<sub>2</sub> and trimethylsilylacetylene  
<sup>n</sup> ynal, dibenzylamine and TMS-acetylene  
<sup>o</sup> isobutyraldehyde, 4-piperidone·HCl and trimethylsilylacetylene  
<sup>p</sup> benzaldehyde, pyrrolidine and phenylacetylene

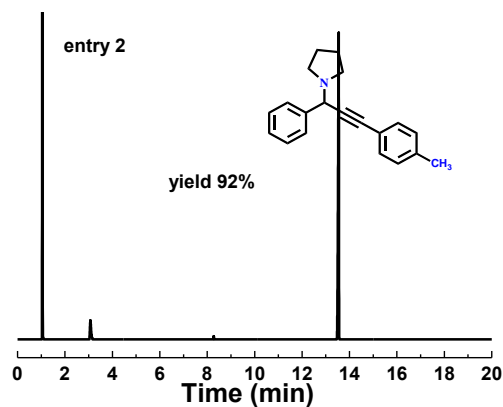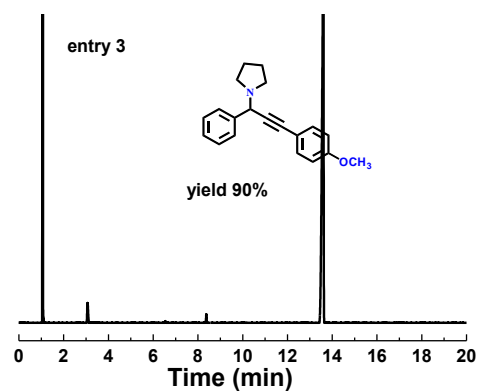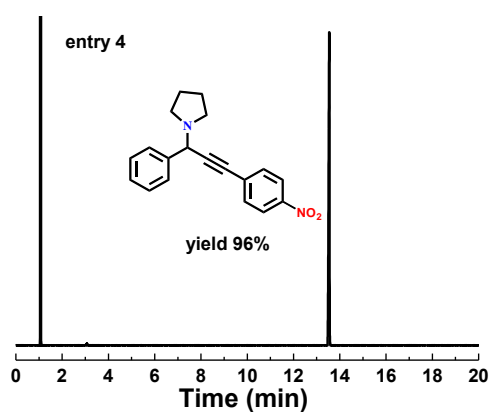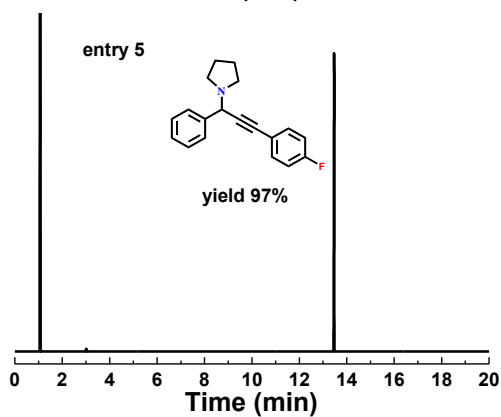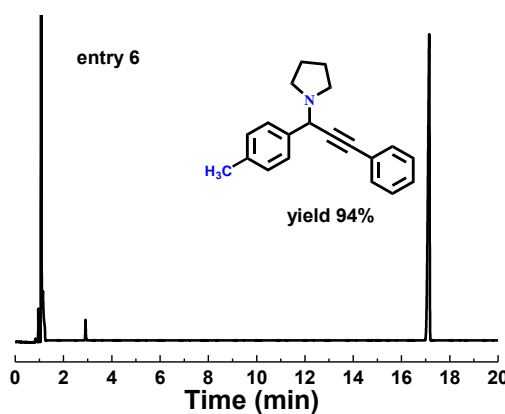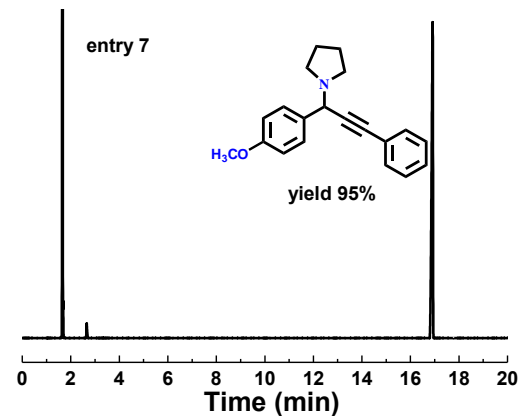

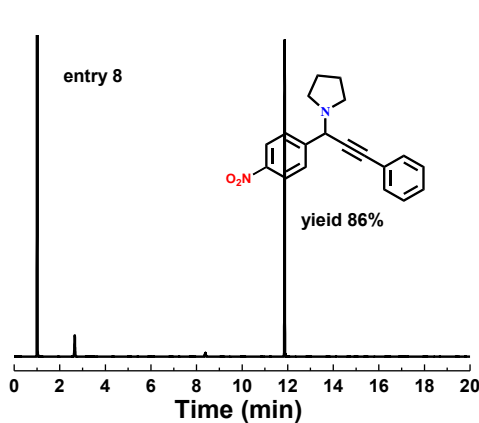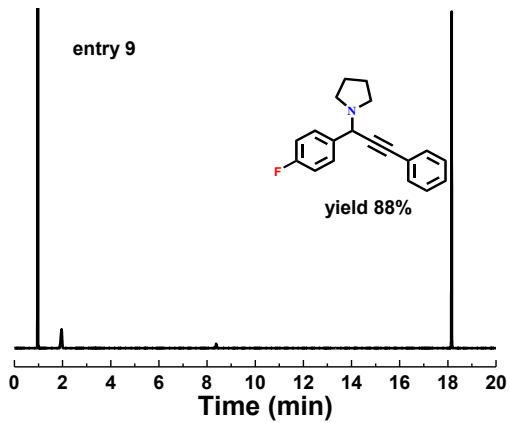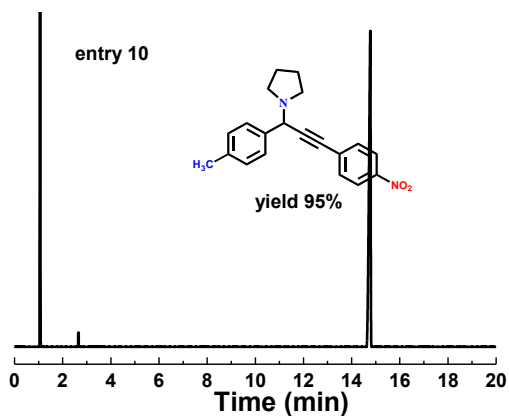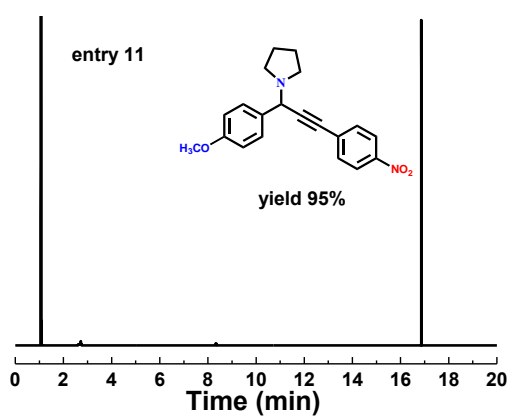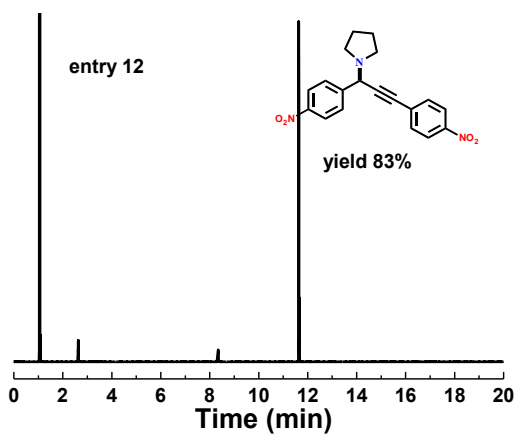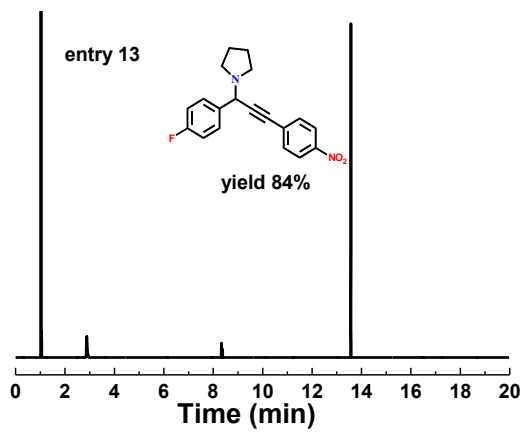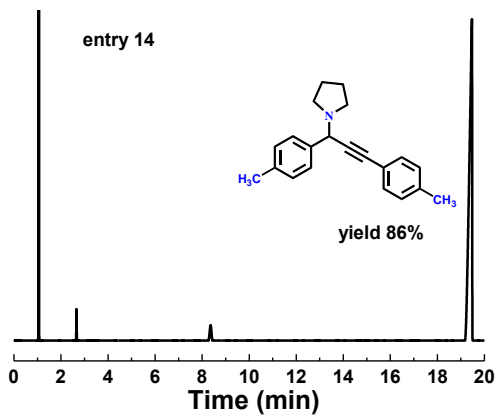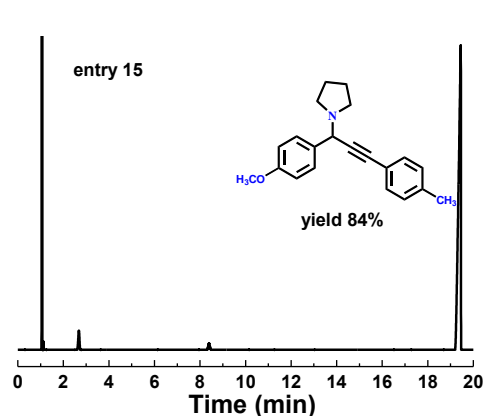

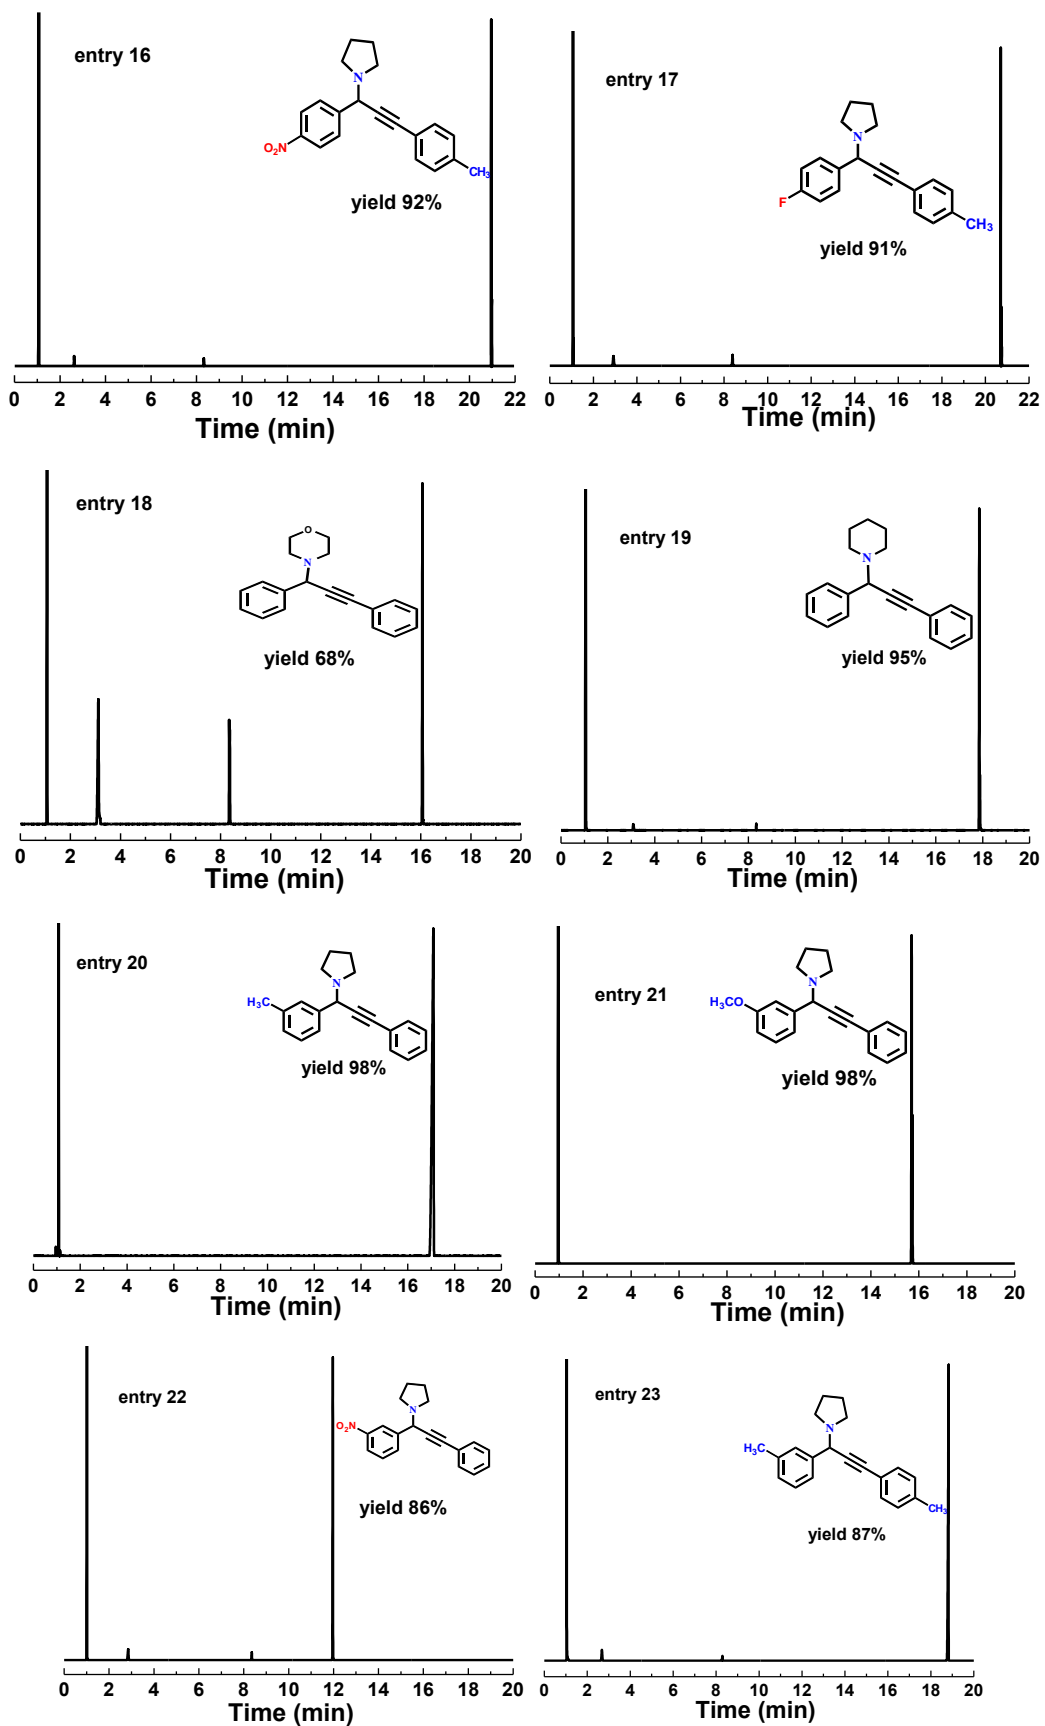

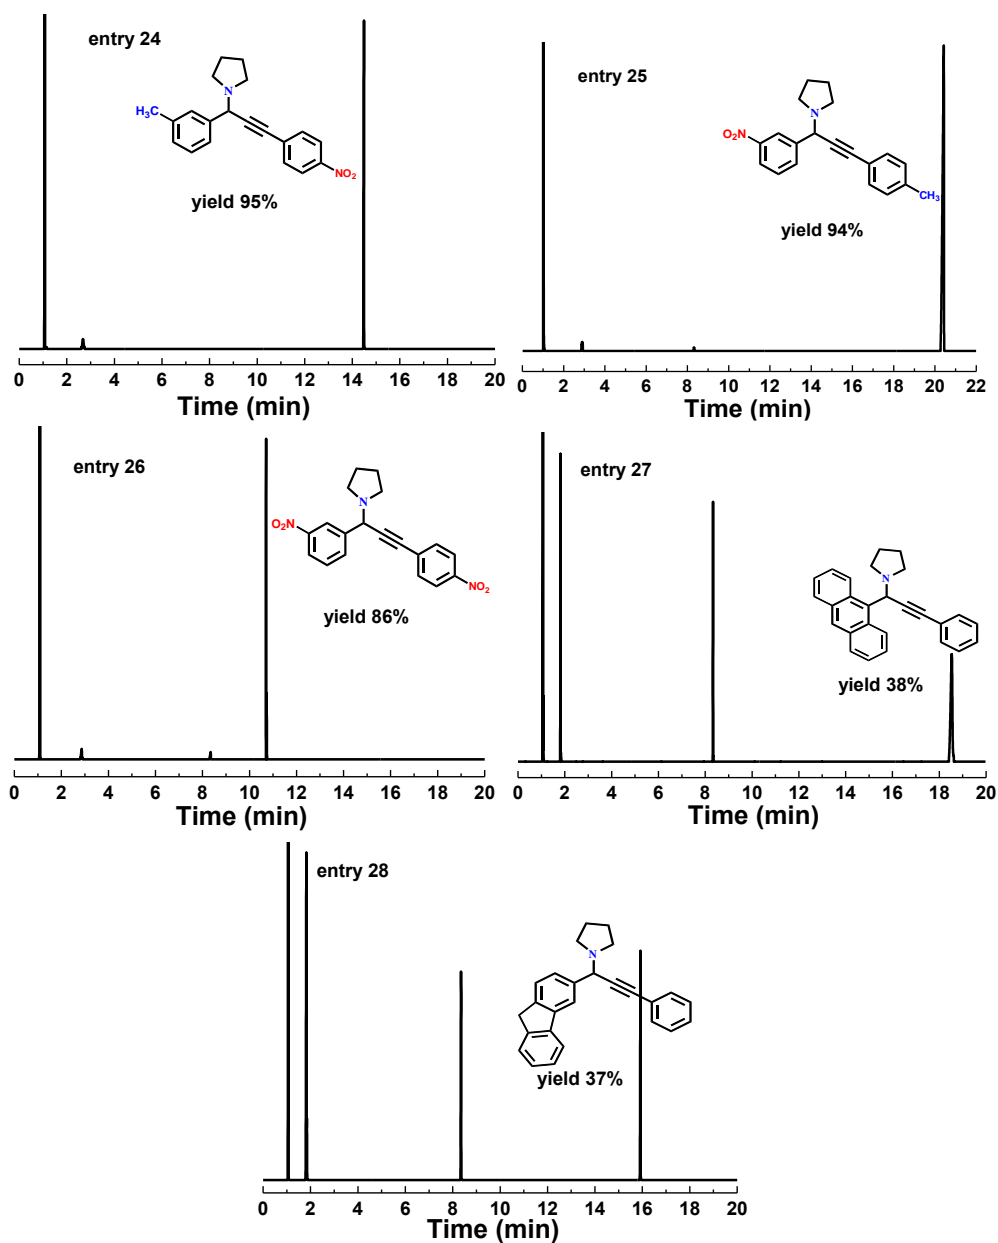

**Supplementary Figure 30.** GC analysis (yield) for the expanded asymmetric  $A^3$ -coupling reactions with various substituted substrates catalyzed by **3** (for Table 4).

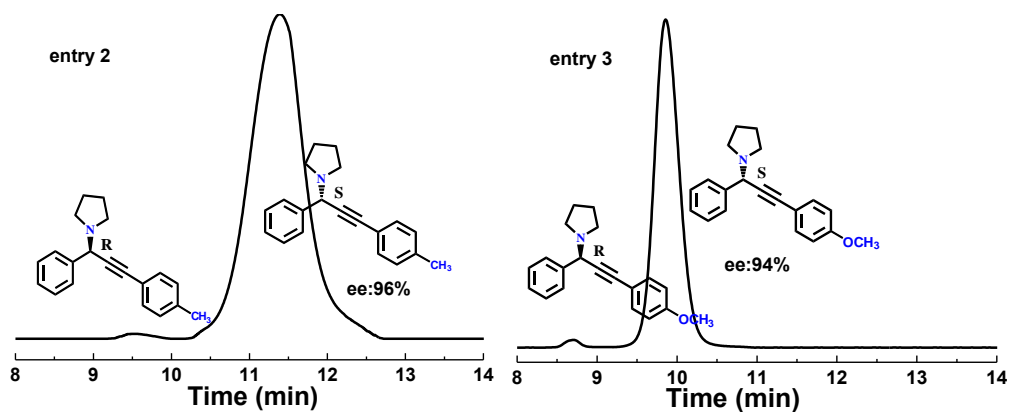



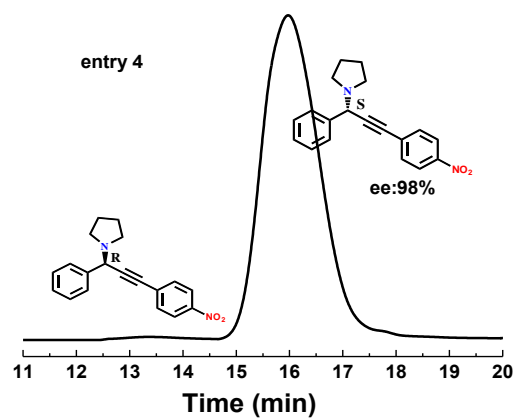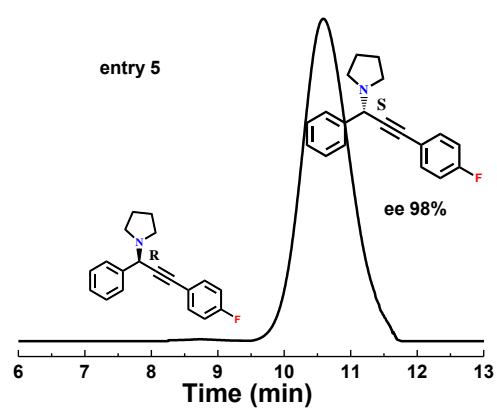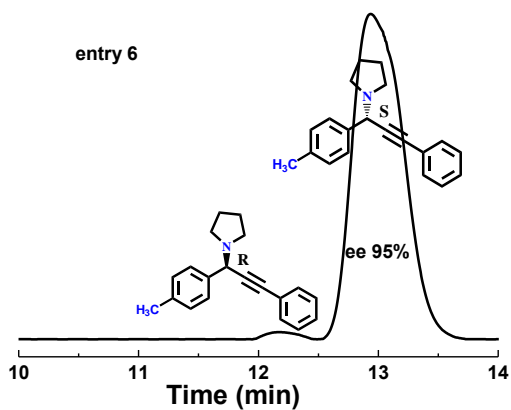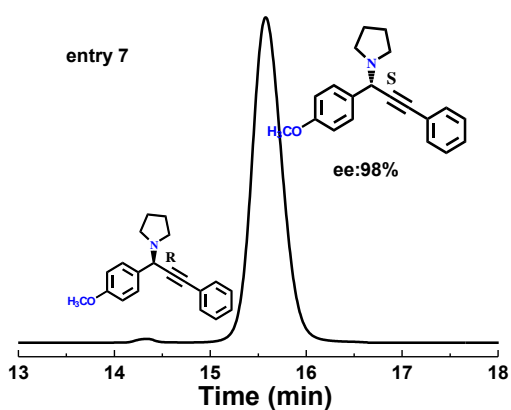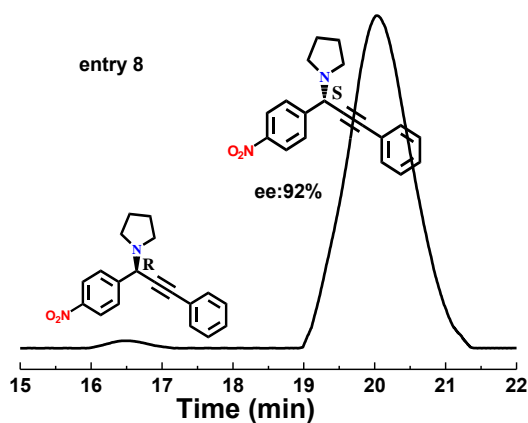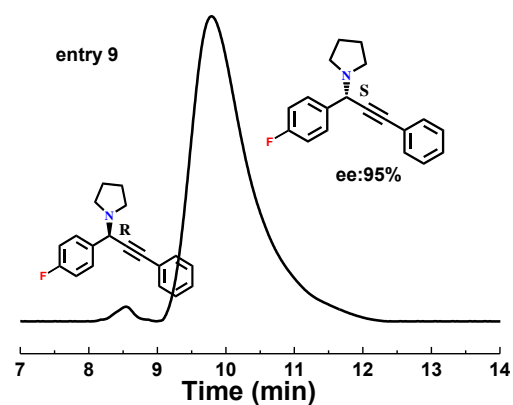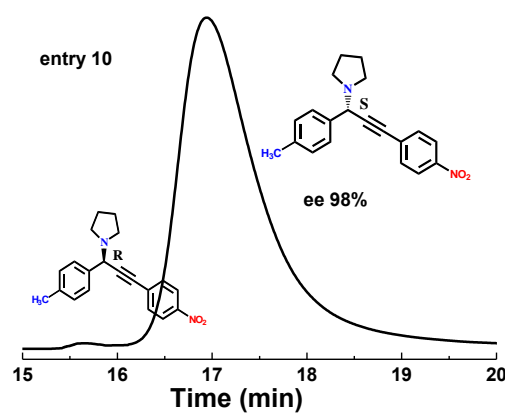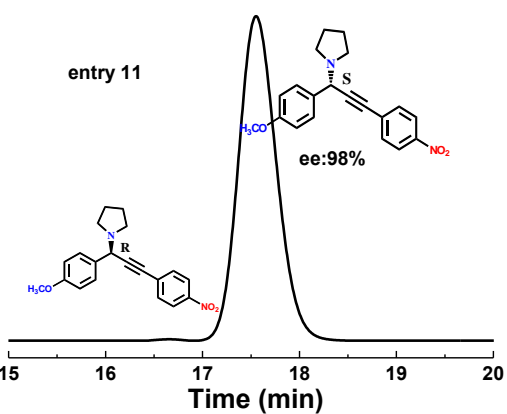

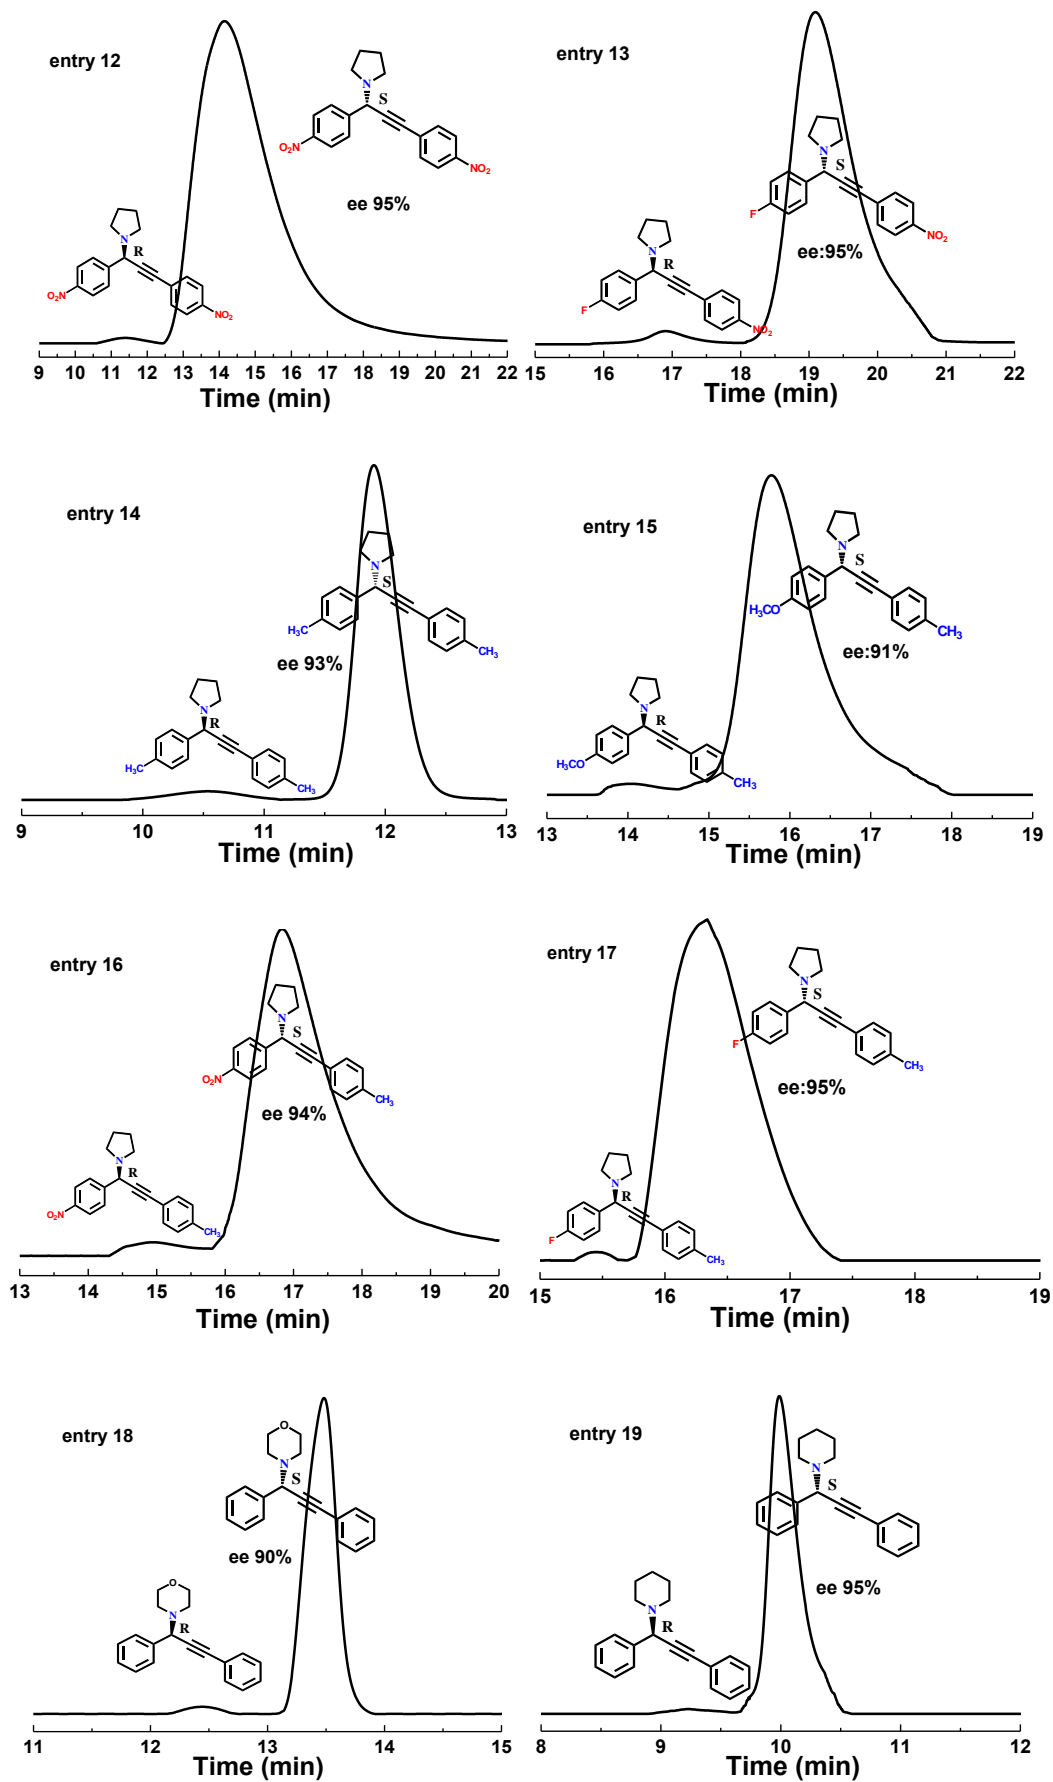

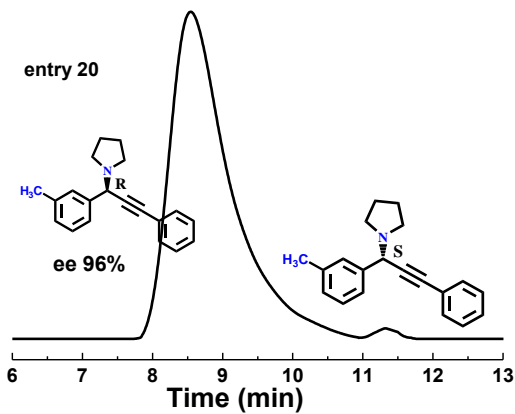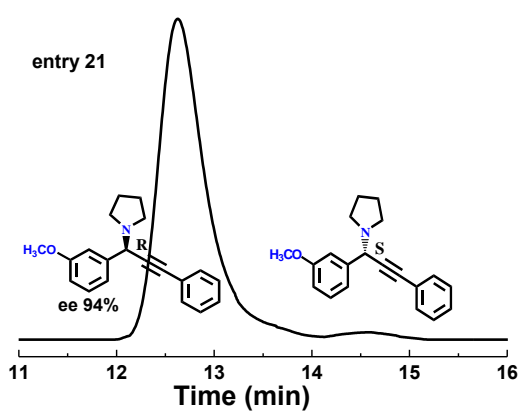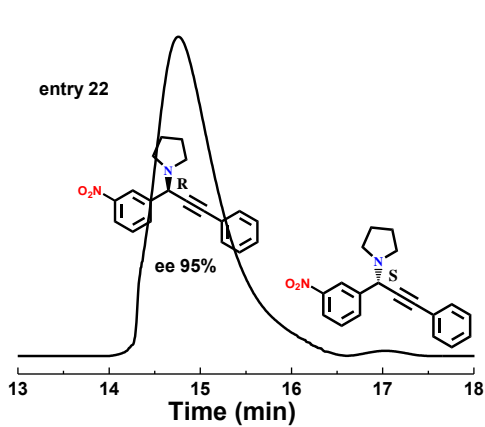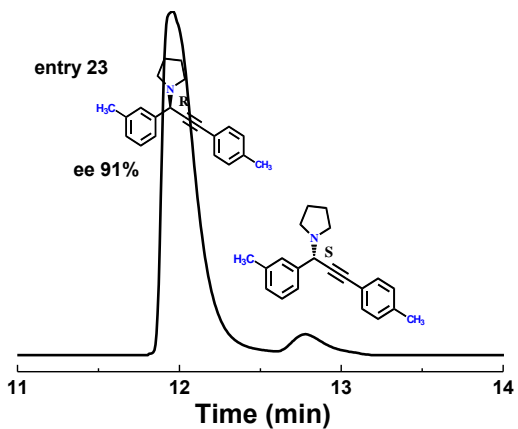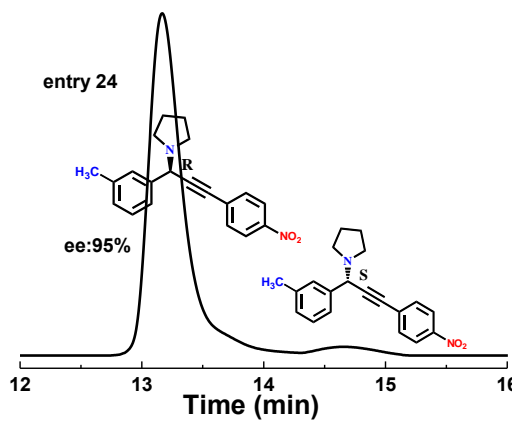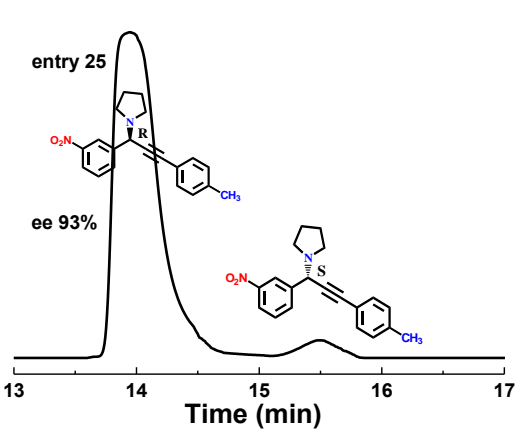

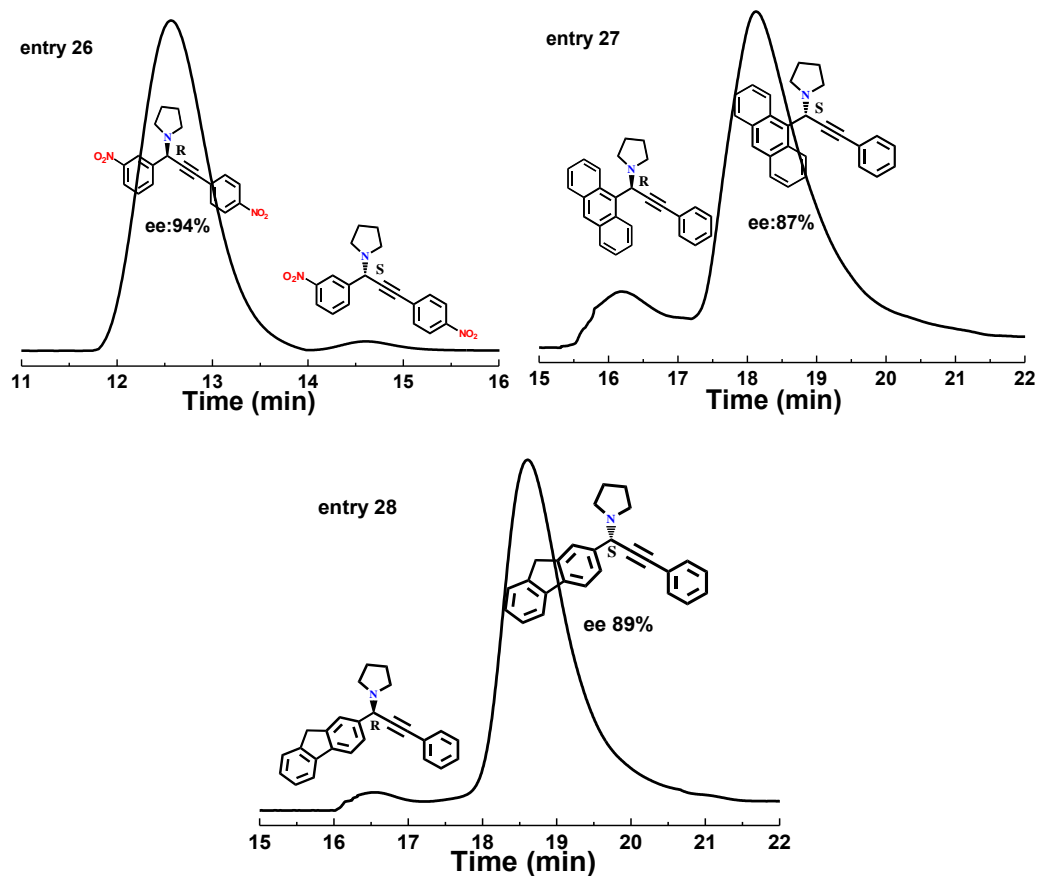

**Supplementary Figure 31.** HPLC (ee) analysis for the expanded asymmetric  $A^3$ -coupling reactions with various substituted substrates catalyzed by **3** (for Table 4). HPLC with a Chiralcel OD-H column was used for the products generated from aromatic aldehyde or aromatic alkyne substrates with electron-withdrawing groups (99 : 1 = *n*-hexane : isopropanol, 1.0 mL min<sup>-1</sup>, 254 nm). HPLC with a Chiralcel OJ-H column was used for the products generated from other types of aromatic aldehyde or aromatic alkyne substrates (99 : 1 = *n*-hexane : isopropanol, 1.0 mL min<sup>-1</sup>, 254 nm).

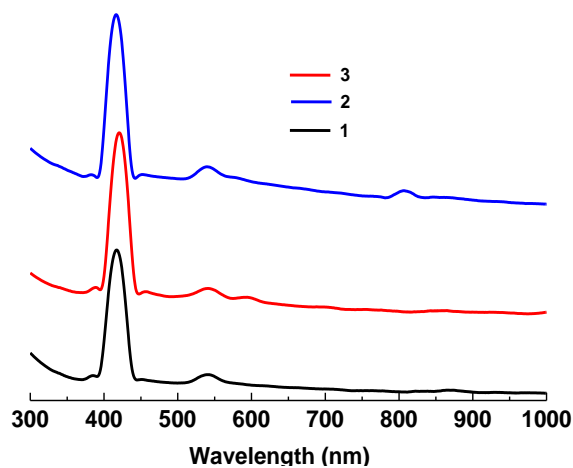

**Supplementary Figure 32.** Absorption spectra of **1**, **2** and **3**. They all displayed the multiple adsorption bands greater than 400 nm, including porphyrin Soret band (ca. 417 nm) and one or two weak Q-bands (540-702 nm).

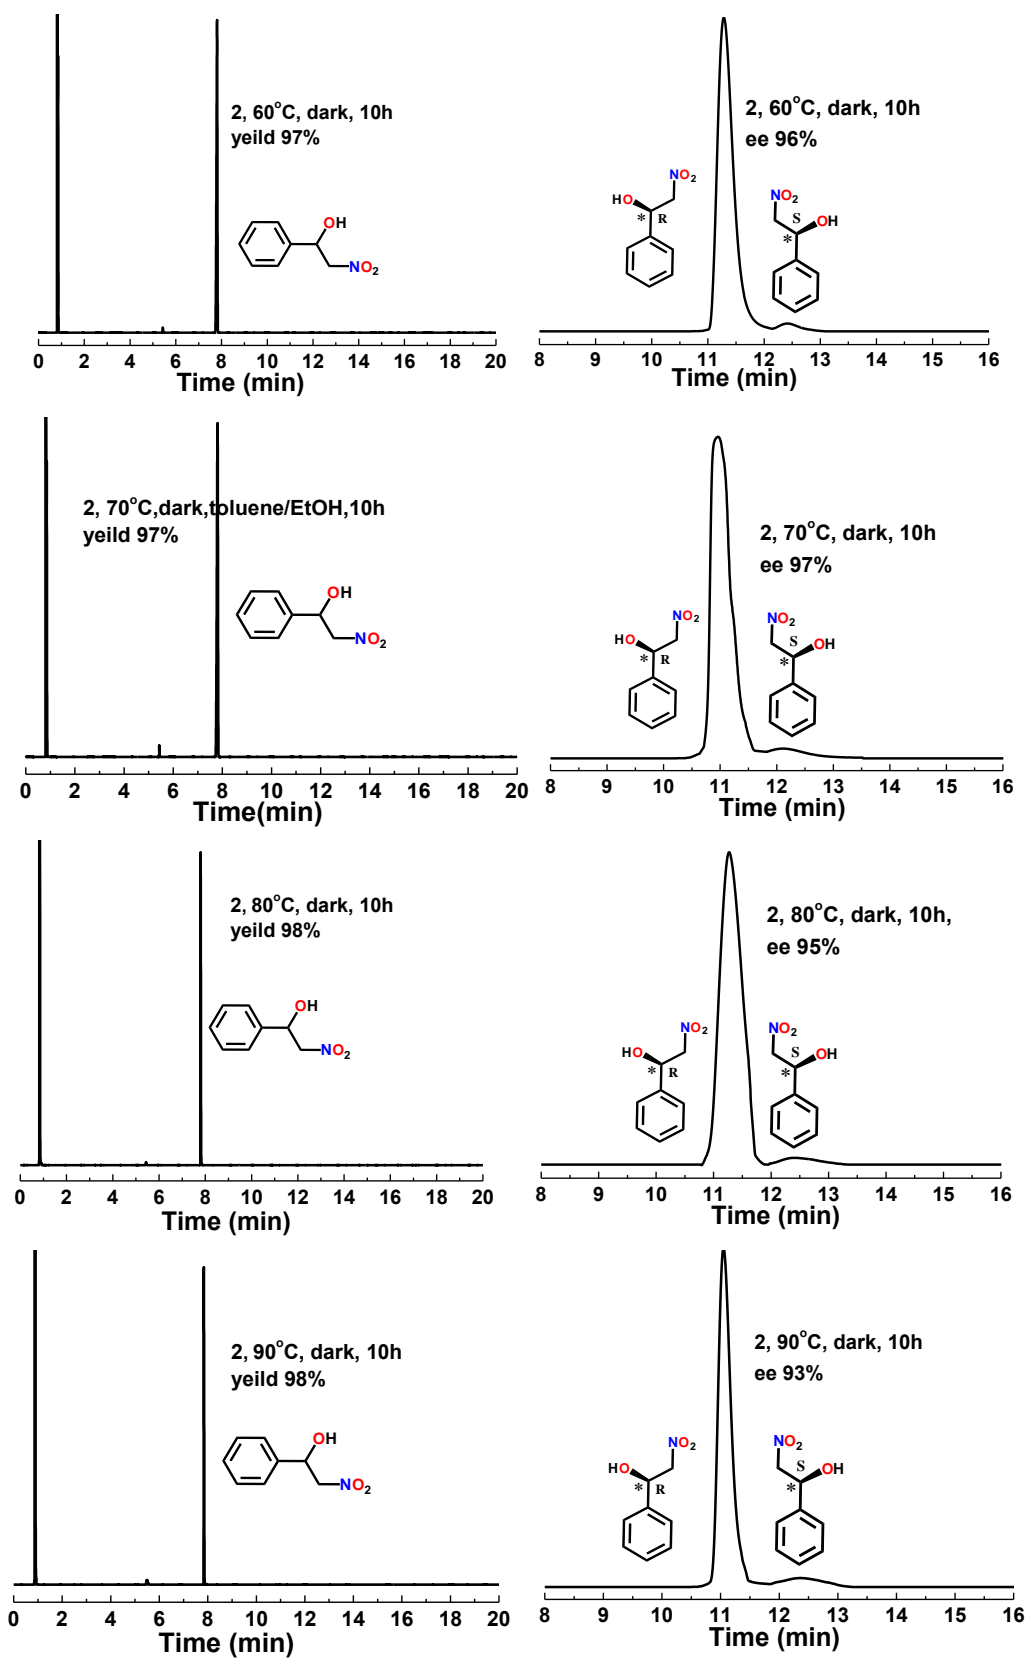

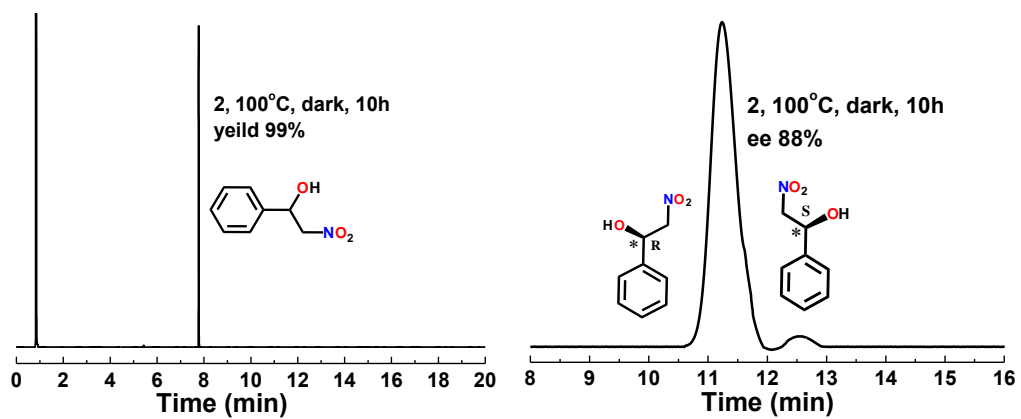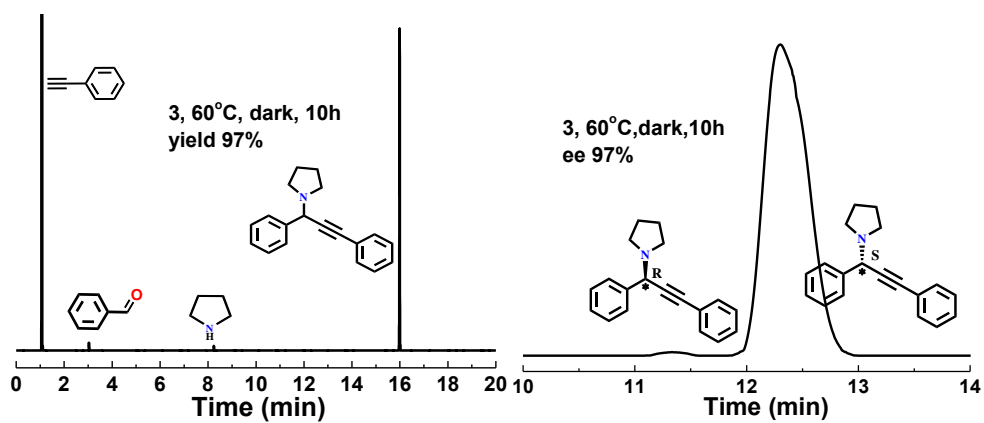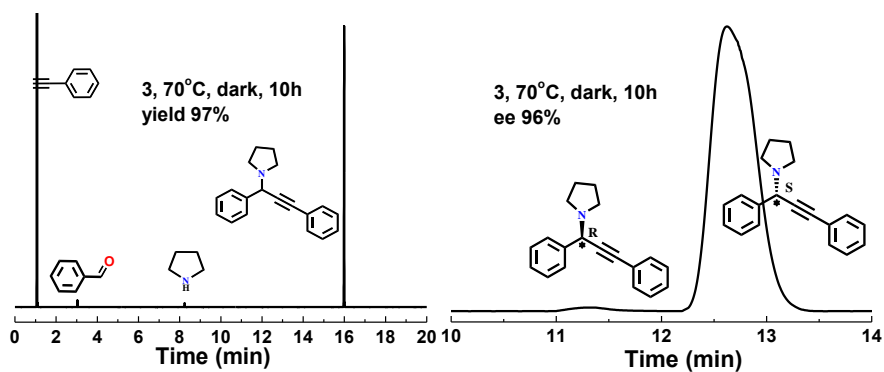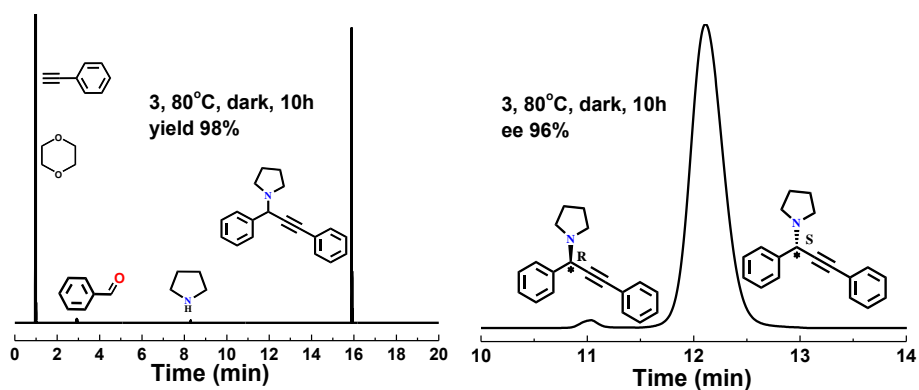

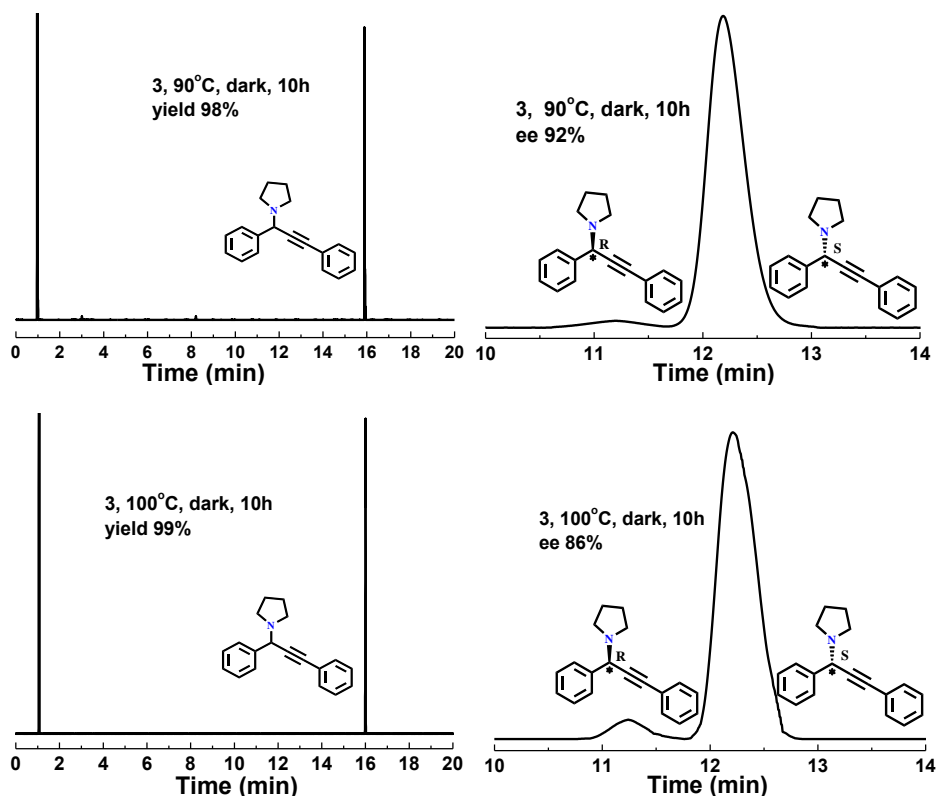

**Supplementary Figure 33.** Yield and ee for the **2**-catalyzed asymmetric model Henry reaction (**2**, 6.0 mg, 1 mol% Au equiv, benzyl alcohol (0.5 mmol), nitromethane (1.5 mmol), K<sub>2</sub>CO<sub>3</sub> (1.5 mmol), PhMe/EtOH (1:1, 2 mL)) and the **3**-catalysed chiral model A<sup>3</sup>-coupling reaction (**3**, 4.5 mg, 2.1 mol Pd% equiv, benzaldehyde (0.5 mmol), phenylacetylene (0.5 mmol), pyrrolidine (0.75 mmol), *p*-dioxane (2 mL)) performed at different temperatures in dark (for Table 5).

#### Supplementary References

- (1) Wang, X., et al. Zinc Tetraphenylporphyrin–Fluorene Branched Copolymers: Synthesis and Light-Emitting Properties. *Macromolecules*. **43**, 709-715 (2010).
- (2) Mayani, V. J., Abdi, S. H. R., Kureshy, R. I., Khan, N. H., Das, A., Bajaj, H. C. Heterogeneous Chiral Copper Complexes of Amino Alcohol for Asymmetric Nitroaldol Reaction. *J. Org. Chem.* **75**, 6191-6195 (2010).
- (3) Noole, A., Lippur, K., Metsala, A., Lopp, M., Kanger, T. Enantioselective Henry Reaction Catalyzed by CuII Salt and Bipiperidine. *J. Org. Chem.* **75**, 1313-1316 (2010).
- (4) Evans, D. A., Seidel, D., Rueping, M., Lam, H. W., Shaw, J. T., Downey, C. W. A New Copper Acetate-Bis(oxazoline)-Catalyzed, Enantioselective Henry Reaction. *J. Am. Chem. Soc.* **125**, 12692-12693 (2003).
- (5) Li, Y., Deng, P., Zeng, Y., Xiong, Y., Zhou, H. anti-Selective Asymmetric Henry Reaction Catalyzed by a Heterobimetallic Cu–Sm–Aminophenol Sulfonamide Complex. *Org. Lett.* **18**, 1578-1581 (2016).
- (6) Yu, X., Pérez, B., Zhang, Z., Gao, R., Guo, Z. Mining catalytic promiscuity from Thermophilic archaea: an acyl-peptide releasing enzyme from *Sulfolobus tokodaii* (ST0779) for nitroaldol reactions. *Green Chem.* **18**, 2753-2761 (2016).
- (7) Kuhbeck, D., Saidulu, G., Reddy, K. R., Diaz, D. D. Critical assessment of the efficiency of chitosan biohydrogel beads as recyclable and heterogeneous organocatalyst for C–C bond formation. *Green Chem.* **14**, 378-392 (2012).
- (8) Lang, K., Park, J., Hong, S. Urea/Transition-Metal Cooperative Catalyst for anti-Selective Asymmetric Nitroaldol Reactions. *Angew. Chem. Int. Ed.* **51**, 1620-1624 (2012).

- (9) Huang, H., Zong, H., Bian, G., Yue, H., Song, L. Correlating the Effects of the N-Substituent Sizes of Chiral 1,2-Amino Phosphinamide Ligands on Enantioselectivities in Catalytic Asymmetric Henry Reaction Using Physical Steric Parameters. *J. Org. Chem.* **79**, 9455-9464 (2014).
- (10) Tanaka, K., Iwashita, T., Yoshida, E.; Ishikawa, T., Otuka, S., Urbanczyk-Lipkowskab, Z., Takahashi, H. Solvent-dependent strong asymmetric amplification in the catalytic enantioselective Henry reaction using the trans-N, N-bis-biphenyl-4-ylmethylcyclohexane-1,2-diamine-CuCl<sub>2</sub> complex. *Chem. Commun.* **51**, 7907-7910 (2015).
- (11) Kitagaki, S., Uedab, T., Mukai, C. Planar chiral [2.2]paracyclophane-based bis(thiourea) catalyst: application to asymmetric Henry reaction. *Chem. Commun.* **49**, 4030-4032 (2013).
- (12) Kanagaraj, K., Suresh, P., Pitchumani, K. Per-6-amino-cyclodextrin as a Reusable Promoter and Chiral Host for Enantioselective Henry Reaction. *Org. Lett.* **12**, 4070-4073 (2010).
- (13) White, D. J., Shaw, S. A New Catalyst for the Asymmetric Henry Reaction: Synthesis of  $\beta$ -Nitroethanols in High Enantiomeric Excess. *Org. Lett.* **14**, 6270-6273 (2012).
- (14) Xiong, Y., Wang, F., Huang, X., Wen, Y., Feng, X. A New Copper(I)-Tetrahydroalolen-Catalyzed Asymmetric Henry Reaction and Its Extension to the Synthesis of (S)-Norphenylephrine. *Chem. Eur. J.* **13**, 829-833 (2007).
- (15) Qin, D. D., et al. Highly Enantioselective Henry Reactions of Aromatic Aldehydes Catalyzed by an Amino Alcohol-Copper(II) Complex. *Chem. Eur. J.* **18**, 10515-10518 (2012).
- (16) Choudary, B. M., Ranganath, K. V. S., Pal, U., Kantam, M. L., Sreedhar, B. Nanocrystalline MgO for Asymmetric Henry and Michael Reactions. *J. Am. Chem. Soc.* **127**, 13167-13171 (2005).
- (17) Scharnagel, D., et al. The First Modular Route to Core-Chiral Bispidine Ligands and Their Application in Enantioselective Copper(II)-Catalyzed Henry Reactions. *Chem. Eur. J.* **21**, 12488-12500 (2015).
- (18) Spangler, K. Y., Wolf, C. Asymmetric Copper(I)-Catalyzed Henry Reaction with an Aminoindanol-Derived Bisoxazolidine Ligand. *Org. Lett.* **11**, 4724-4727 (2009).
- (19) Marcelli, T., Haas, R. N. S., Maarseveen, J. H., Hiemstra, H. Asymmetric Organocatalytic Henry Reaction. *Angew. Chem. Int. Ed.* **45**, 929-931 (2006).
- (20) Ma, H. C., Kan, J. L., Chen, G. J., Chen, C. X., Dong, Y. B. Pd NPs-Loaded Homochiral Covalent Organic Framework for Heterogeneous Asymmetric Catalysis. *Chem. Mater.* **15**, 6518-6524 (2017).
- (21) Zhao, C., Seidel, D. Enantioselective A<sup>3</sup> Reactions of Secondary Amines with a Cu(I)/ Acid-Thiourea Catalyst Combination. *J. Am. Chem. Soc.* **137**, 4650-4653 (2015).
- (22) Rokade, B. V., Guiry, P. J. Diastereofacial  $\pi$ -Stacking as an Approach To Access an Axially Chiral P,N-Ligand for Asymmetric Catalysis. *ACS Catal.* **7**, 2334-2338 (2017).
- (23) Wei, C., Mague, J. T., Li, C. J. Cu(I)-catalyzed direct addition and asymmetric addition of terminal alkynes to imines. *PNAS.* **101**, 5749-5754 (2004).
- (24) Bisai, A., Singh, V. K. Enantioselective One-Pot Three-Component Synthesis of Propargylamines. *Org. Lett.* **8**, 2405-2408 (2006).
- (25) Gao, X. T., Gan, C. C., Liu, S. Y., Zhou, F., Wu, H. H., and Zhou, J. Utilization of CO<sub>2</sub> as a C<sub>1</sub> Building Block in a Tandem Asymmetric A<sup>3</sup> Coupling-Carboxylative Cyclization Sequence to 2-Oxazolidinones. *ACS Catal.* **7**, 8588-8593 (2017).
- (26) Gommermann, N., Koradin, C., Polborn, K., Knochel, P. Enantioselective, Copper(I)-Catalyzed Three-Component Reaction for the Preparation of Propargylamines. *Angew. Chem. Int. Ed.* **42**, 5763-5766 (2003).
- (27) Knöpfel, T. F., Aschwanden, P., Ichikawa, T., Watanabe, T., Carreira, E. M. Readily Available Biaryl P,N Ligands for Asymmetric Catalysis. *Angew. Chem. Int. Ed.* **43**, 5971-5973 (2004).
- (28) Bisai, V., Suneja, A., Singh, V. K. Asymmetric Alkynylation/Lactamization Cascade: An Expedient Entry to Enantiomerically Enriched Isoindolinones. *Angew. Chem. Int. Ed.* **53**, 10737-10741 (2014).
- (29) Gommermann, N., Knochel, P. Practical highly enantioselective synthesis of terminal propargylamines. An expeditious synthesis of (S)-(1)-coniine. *Chem. Commun.* 2324- 2325 (2004).



- (30) Li, Z., Jiang, Z., and Su, W. Fast, solvent-free, highly enantioselective three-component coupling of aldehydes, alkynes, and amines catalysed by the copper( II )pybox complex under high-vibration ball-milling. *Green Chem.* **17**, 2330-2334 (2015).
- (31) Zani, L., Eichhorn, T., Bolm, C. Dimethylzinc-Mediated, Enantioselective Synthesis of Propargylic Amines. *Chem. Eur. J.* **13**, 2587-2600 (2007).
- (32) Nakamura, S., Ohara, M., Nakamura, Y., Shibata, N., Toru, T. Copper-Catalyzed Enantioselective Three-Component Synthesis of Optically Active Propargylamines from Aldehydes, Amines, and Aliphatic Alkynes. *Chem. Eur. J.* **16**, 2360-2362 (2010).
- (33) Cardoso, F. S. P., Abboud, K. A., Aponick, A. Design, Preparation, and Implementation of an Imidazole-Based Chiral Biaryl P,N-Ligand for Asymmetric Catalysis. *J. Am. Chem. Soc.* **135**, 14548-14551 (2013).
- (34) Paioti, P. H. S., Abboud, K. A., Aponick, A. Catalytic Enantioselective Synthesis of Amino Skipped Diynes. *J. Am. Chem. Soc.* **138**, 2150-2153 (2016).
- (35) Aschwanden, P., J. Stephenson, C. R., Carreira, E. M. Highly Enantioselective Access to Primary Propargylamines: 4-Piperidinone as a Convenient Protecting Group. *Org. Lett.* **8**, 2437-2440 (2006).
